# Supplementary material for: Efficient and practical synthesis of enantioenriched 2,3-dihydropyrroles through gold-catalyzed anti-Markovnikov hydroamination of chiral homopropargyl sulfonamides
Source: Royal Society of Chemistry journal article supplement (doi:10.1039/c4cc09245g), 2014-12-17

Supporting Information

**Efficient and practical synthesis of enantioenriched 2,3-dihydropyrroles through  
gold-catalyzed anti-Markovnikov hydroamination of chiral homopropargyl  
sulfonamides**

Yong-Fei Yu, Chao Shu, Bo Zhou, Jian-Qiao Li, Jin-Mei Zhou and Long-Wu Ye\*

State Key Laboratory for Physical Chemistry of Solid Surfaces & The Key Laboratory  
for Chemical Biology of Fujian Province, Department of Chemistry, Xiamen University,  
Xiamen 361005, Fujian, P. R. China

| <b>Content</b>                                      | <b>Page number</b> |
|-----------------------------------------------------|--------------------|
| <b>General</b>                                      | 2                  |
| <b>Preparation of Starting Materials</b>            | 2                  |
| <b>General Procedure: Gold Catalysis</b>            | 3                  |
| <b>HPLC Chromatograms</b>                           | 14                 |
| <b><sup>1</sup>H and <sup>13</sup>C NMR spectra</b> | 34                 |

**General Information.** Ethyl acetate (ACS grade), hexanes (ACS grade) and anhydrous 1, 2-dichloroethane (ACS grade) were obtained commercially and used without further purification. Methylene chloride, tetrahydrofuran and diethyl ether were purified according to standard methods unless otherwise noted. Commercially available reagents were used without further purification. Reactions were monitored by thin layer chromatography (TLC) using silicycle pre-coated silica gel plates. Flash column chromatography was performed over silica gel (300-400 mesh). Infrared spectra were recorded on a Nicolet AVATER FTIR330 spectrometer as thin film and are reported in reciprocal centimeter ( $\text{cm}^{-1}$ ). Mass spectra were recorded with Micromass QTOF2 Quadrupole/Time-of-Flight Tandem mass spectrometer using electron spray ionization.

$^1\text{H}$  NMR spectra were recorded on a Bruker AV-400 spectrometer and a Bruker AV-500 spectrometer in chloroform- $\text{d}_3$ . Chemical shifts are reported in ppm with the internal TMS signal at 0.0 ppm as a standard. The data is being reported as (s = singlet, d = doublet, t = triplet, m = multiplet or unresolved, brs = broad singlet, coupling constant(s) in Hz, integration).

$^{13}\text{C}$  NMR spectra were recorded on on a Bruker AV-400 spectrometer and a Bruker AV-500 spectrometer in chloroform- $\text{d}_3$ . Chemical shifts are reported in ppm with the internal chloroform signal at 77.0 ppm as a standard.

Compounds **1a-1q**, **3a** and **1a'** were prepared according to the following procedures and their data were reported in our previous work.<sup>1</sup>

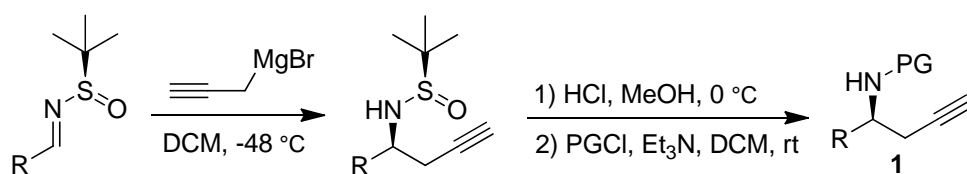

**(R)-4-methyl-N-(4-methyloct-1-yn-4-yl)benzenesulfonamide (1r)**

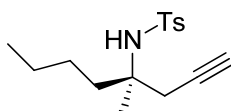

## 1r

Compound **1r** was prepared according to the known procedures.<sup>2</sup>  $[\alpha]_D^{20} = -30.5^\circ$  ( $c = 1.0$ ,  $\text{CHCl}_3$ ). 93% ee (determined by HPLC: Chiralpak OD-H Column, 2/98 *i*-PrOH/hexane, 0.6 mL/min, 200 nm; TR = 31.27 min (major), 33.94 min (minor)).  $^1\text{H}$  NMR (400 MHz,  $\text{CDCl}_3$ )  $\delta$  7.79 (d, 2H,  $J = 8.4$  Hz), 7.28 (d, 2H,  $J = 8.0$  Hz), 4.88 (s, 1H), 2.42 (s, 3H), 2.40 (d, 2H,  $J = 2.4$  Hz), 2.03 (t, 1H,  $J = 2.8$  Hz), 1.68 – 1.60 (m, 1H), 1.57 – 1.50 (m, 1H), 1.24 – 1.12 (m, 7H), 0.83 (t, 3H,  $J = 6.4$  Hz);  $^{13}\text{C}$  NMR (100 MHz,  $\text{CDCl}_3$ )  $\delta$  143.0, 140.1, 129.4, 127.0, 80.0, 71.6, 58.3, 39.6, 31.1, 25.6, 23.7, 22.8, 21.4, 13.9; IR (neat): 3280, 2936, 2928, 2871, 1456, 1315, 1258, 1090, 1001, 820, 655; MS (ESI,  $m/z$ ) 316 ( $\text{M} + \text{Na}^+$ ); HRESIMS Calcd for  $[\text{C}_{16}\text{H}_{23}\text{NNaO}_2\text{S}]^+$  ( $\text{M} + \text{Na}^+$ ) 316.1347, found 316.1342.

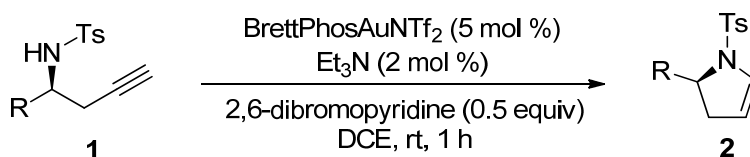

### General procedure for the synthesis of **2**:

2,6-Dibromopyridine (35.5 mg, 0.15 mmol), Et<sub>3</sub>N (2.0 mL, 0.003 mmol/mL in DCE) and BrettPhosAuNTf<sub>2</sub> (15.3 mg, 0.015 mmol) were added in this order to a solution of the homopropargyl sulfonamide **1** (0.30 mmol) in DCE (4.0 mL) at room temperature. The reaction mixture was stirred at room temperature and the progress of the reaction was monitored by TLC. The reaction typically took 1 h. Upon completion, the mixture was then concentrated and the residue was purified by chromatography on silica gel (eluent: hexanes/ethyl acetate) to afford the desired product **2**.

### (*R*)-2-heptyl-1-tosyl-2,3-dihydro-1H-pyrrole (**2a**)

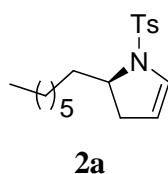

$[\alpha]_D^{20} = -437.2^\circ$  ( $c = 1.0$ ,  $\text{CHCl}_3$ ). 99% ee (determined by HPLC: Chiralcel AS-H Column, 2/98 *i*-PrOH/hexane, 0.6 mL/min, 200 nm; TR = 20.73 min (major), 17.86 min (minor)).  $^1\text{H}$  NMR (400 MHz,  $\text{CDCl}_3$ )  $\delta$  7.66 (d, 2H,  $J = 8.4$  Hz), 7.29 (d, 2H,  $J = 8.0$  Hz), 6.30 (dt, 1H,  $J = 2.0$  Hz,  $J = 4.0$  Hz), 5.07 (dt, 1H,  $J = 2.0$  Hz,  $J = 3.6$  Hz), 3.71 – 3.64 (m, 1H), 2.42 (s, 3H), 2.41 – 2.36 (m, 1H), 2.15 – 2.08 (m, 1H), 1.87 – 1.79 (m, 1H), 1.63 – 1.50 (m, 1H), 1.39 – 1.27 (m, 10H), 0.88 (t, 3H,  $J = 7.0$  Hz);  $^{13}\text{C}$  NMR (100 MHz,  $\text{CDCl}_3$ )  $\delta$  143.5, 133.8, 130.4, 129.5, 127.5, 111.9, 60.1, 36.2, 35.7, 31.8, 29.4, 29.2, 24.6, 22.6, 21.5, 14.0; IR (neat): 2926, 2856, 1597, 1456, 1340, 1162, 815, 708, 672, 590; MS (ESI,  $m/z$ ) 344 ( $\text{M} + \text{Na}^+$ ); HRESIMS Calcd for  $[\text{C}_{18}\text{H}_{27}\text{NNaO}_2\text{S}]^+$  ( $\text{M} + \text{Na}^+$ ) 344.1660, found 344.1656.

**(S)-2-cyclohexyl-1-tosyl-2,3-dihydro-1H-pyrrole (2b)**

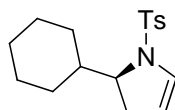

**2b**

$[\alpha]_D^{20} = -417.4^\circ$  ( $c = 1.0$ ,  $\text{CHCl}_3$ ). 99% ee (determined by HPLC: Chiralcel AS-H Column, 2/98 *i*-PrOH/hexane, 0.6 mL/min, 200 nm; TR = 28.04 min (major), 33.17 min (minor)).  $^1\text{H}$  NMR (400 MHz,  $\text{CDCl}_3$ )  $\delta$  7.66 (d, 2H,  $J = 8.0$  Hz), 7.29 (d, 2H,  $J = 8.0$  Hz), 6.29 (dt, 1H,  $J = 2.0$  Hz,  $J = 3.6$  Hz), 5.08 (dt, 1H,  $J = 2.0$  Hz,  $J = 3.6$  Hz), 3.64 – 3.59 (m, 1H), 2.42 (s, 3H), 2.24 – 2.12 (m, 2H), 1.77 – 1.58 (m, 7H), 1.29 – 0.95 (m, 4H);  $^{13}\text{C}$  NMR (100 MHz,  $\text{CDCl}_3$ )  $\delta$  143.4, 134.0, 130.9, 129.4, 127.6, 113.1, 64.4, 42.3, 31.5, 28.7, 26.5, 26.2, 26.1, 25.9, 21.5; IR (neat): 2924, 2851, 1621, 1596, 1343, 1160, 970, 813, 667, 592; MS (ESI,  $m/z$ ) 328 ( $\text{M} + \text{Na}^+$ ); HRESIMS Calcd for  $[\text{C}_{17}\text{H}_{23}\text{NNaO}_2\text{S}]^+$  ( $\text{M} + \text{Na}^+$ ) 328.1347, found 328.1349.

**(R)-2-phenethyl-1-tosyl-2,3-dihydro-1H-pyrrole (2c)**

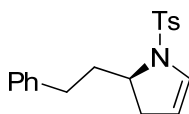

### 2c

$[\alpha]_D^{20} = -310.1^\circ$  ( $c = 0.4$ ,  $\text{CHCl}_3$ ). 98% ee (determined by HPLC: Chiralcel AS-H Column, 5/95 *i*-PrOH/hexane, 0.8 mL/min, 200 nm; TR = 22.99 min (major), 18.19 min (minor)).  $^1\text{H}$  NMR (400 MHz,  $\text{CDCl}_3$ )  $\delta$  7.54 (d, 2H,  $J = 8.4$  Hz), 7.31 – 7.18 (m, 7H), 6.32 (dt, 1H,  $J = 2.0$  Hz,  $J = 4.0$  Hz), 5.09 (dt, 1H,  $J = 2.0$  Hz,  $J = 4.0$  Hz), 3.69 – 3.62 (m, 1H), 2.82 – 2.75 (m, 1H), 2.65 – 2.58 (m, 1H), 2.47 – 2.41 (m, 1H), 2.40 (s, 3H), 2.27 – 2.15 (m, 2H), 1.98 – 1.93 (m, 1H);  $^{13}\text{C}$  NMR (100 MHz,  $\text{CDCl}_3$ )  $\delta$  143.5, 141.4, 133.4, 130.6, 129.5, 128.4, 128.3, 127.6, 125.8, 111.8, 59.4, 37.6, 35.6, 31.0, 21.5; IR (neat): 2924, 2854, 1620, 1596, 1348, 1163, 959, 814, 723, 700; MS (ESI,  $m/z$ ) 350 ( $\text{M} + \text{Na}^+$ ); HRESIMS Calcd for  $[\text{C}_{19}\text{H}_{21}\text{NNO}_2\text{S}]^+$  ( $\text{M} + \text{Na}^+$ ) 350.1191, found 350.1186.

### (*R*)-2-(5-(benzyloxy)pentyl)-1-tosyl-2,3-dihydro-1H-pyrrole (2d)

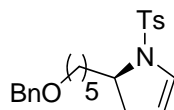

### 2d

$[\alpha]_D^{20} = -213.4^\circ$  ( $c = 1.0$ ,  $\text{CHCl}_3$ ). 98% ee (determined by HPLC: Chiralcel AS-H Column, 10/90 *i*-PrOH/hexane, 0.6 mL/min, 200 nm; TR = 27.36 min (major), 22.63 min (minor)).  $^1\text{H}$  NMR (400 MHz,  $\text{CDCl}_3$ )  $\delta$  7.65 (d, 2H,  $J = 8.0$  Hz), 7.35 – 7.25 (m, 7H), 6.30 (dt, 1H,  $J = 2.0$  Hz,  $J = 4.0$  Hz), 5.06 (dt, 1H,  $J = 1.6$  Hz,  $J = 4.0$  Hz), 4.50 (s, 2H), 3.70 – 3.65 (m, 1H), 3.47 (t, 2H,  $J = 6.4$  Hz), 2.41 (s, 3H), 2.39 – 2.35 (m, 1H), 2.12 – 2.11 (m, 1H), 1.83 – 1.81 (m, 1H), 1.70 – 1.60 (m, 3H), 1.43 – 1.33 (m, 4H);  $^{13}\text{C}$  NMR (100 MHz,  $\text{CDCl}_3$ )  $\delta$  143.5, 138.6, 133.8, 130.4, 129.5, 128.3, 127.6, 127.5, 127.4, 111.9, 72.8, 70.3, 59.9, 36.1, 35.7, 29.6, 26.0, 24.4, 21.5; IR (neat): 2925, 2856, 1619, 1597, 1494, 1454, 1353, 958, 814, 735, 698, 666, 596; MS (ESI,  $m/z$ ) 400 ( $\text{M} + \text{H}^+$ ); HRESIMS Calcd for  $[\text{C}_{23}\text{H}_{30}\text{NO}_3\text{S}]^+$  ( $\text{M} + \text{H}^+$ ) 400.1946, found 400.1942.

### (*R*)-2-(3-(1-tosyl-2,3-dihydro-1H-pyrrol-2-yl)propyl)isoindoline-1,3-dione (2e)

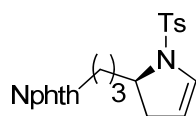

**2e**

$[\alpha]_D^{20} = -173.2^\circ$  ( $c = 0.4$ ,  $\text{CHCl}_3$ ). 98% ee (determined by HPLC: Chiralcel AS-H Column, 10/90 *i*-PrOH/hexane, 0.7 mL/min, 200 nm; TR = 60.36 min (major), 64.55 min (minor)).  $^1\text{H}$  NMR (400 MHz,  $\text{CDCl}_3$ )  $\delta$  7.84 (dd, 2H,  $J = 2.8$  Hz,  $J = 5.4$  Hz), 7.71 (dd, 2H,  $J = 2.8$  Hz,  $J = 5.6$  Hz), 7.66 (d, 2H,  $J = 8.4$  Hz), 7.30 (d, 2H,  $J = 8.0$  Hz), 6.28 (dt, 1H,  $J = 2.0$  Hz,  $J = 4.0$  Hz), 5.09 (dt, 1H,  $J = 2.4$  Hz,  $J = 4.0$  Hz), 3.80 – 3.72 (m, 3H), 2.42 (s, 3H), 2.40 – 2.34 (m, 1H), 2.09 – 2.04 (m, 1H), 1.85 – 1.79 (m, 2H), 1.69 – 1.63 (m, 2H);  $^{13}\text{C}$  NMR (100 MHz,  $\text{CDCl}_3$ )  $\delta$  168.4, 143.6, 133.9, 133.7, 132.1, 130.4, 129.5, 127.6, 123.2, 112.4, 59.2, 37.6, 35.7, 33.2, 23.8, 21.5; IR (neat): 2923, 2853, 1660, 1564, 1378, 980, 800, 786, 744, 719, 666, 650; MS (ESI,  $m/z$ ) 433 ( $\text{M} + \text{Na}^+$ ); HRESIMS Calcd for  $[\text{C}_{22}\text{H}_{22}\text{N}_2\text{NaO}_4\text{S}]^+$  ( $\text{M} + \text{Na}^+$ ) 433.1198, found 433.1193.

**(R)-2-tetradecyl-1-tosyl-2,3-dihydro-1H-pyrrole (2f)**

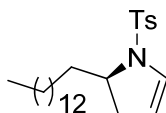

**2f**

$[\alpha]_D^{20} = -248.5^\circ$  ( $c = 1.0$ ,  $\text{CHCl}_3$ ). 98% ee (determined by HPLC: Chiralcel AS-H Column, 1/99 *i*-PrOH/hexane, 0.5 mL/min, 200 nm; TR = 15.71 min (major), 14.09 min (minor)).  $^1\text{H}$  NMR (400 MHz,  $\text{CDCl}_3$ )  $\delta$  7.74 (d, 2H,  $J = 8.4$  Hz), 7.29 (d, 2H,  $J = 8.0$  Hz), 6.30 (dt, 1H,  $J = 2.0$  Hz,  $J = 4.0$  Hz), 5.07 (dt, 1H,  $J = 2.0$  Hz,  $J = 4.0$  Hz), 3.69 – 3.65 (m, 1H), 2.42 (s, 3H), 2.42 – 2.40 (m, 1H), 2.14 – 2.10 (m, 1H), 1.86 – 1.80 (m, 1H), 1.63 – 1.60 (m, 1H), 1.27 – 1.26 (m, 24H), 0.88 (t, 3H,  $J = 6.8$  Hz);  $^{13}\text{C}$  NMR (100 MHz,  $\text{CDCl}_3$ )  $\delta$  143.5, 134.0, 130.5, 129.5, 127.6, 111.8, 60.2, 36.2, 35.7, 31.9, 29.6(9), 29.6(6), 29.6(5), 29.6(1), 25.5(9), 29.5, 29.4, 24.7, 22.7, 21.5, 14.1; IR (neat): 2958, 2924, 2853, 1620, 1598, 1465, 1356, 1167, 958, 813, 718, 666, 595; MS (ESI,  $m/z$ ) 442 ( $\text{M} + \text{Na}^+$ ); HRESIMS Calcd for  $[\text{C}_{25}\text{H}_{41}\text{NNaO}_2\text{S}]^+$  ( $\text{M} + \text{Na}^+$ ) 442.2756, found 442.2754.

**(R)-2-(9-phenylnonyl)-1-tosyl-2,3-dihydro-1H-pyrrole (2g)**

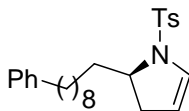

**2g**

$[\alpha]_D^{20} = -332.7^\circ$  ( $c = 1.0$ ,  $\text{CHCl}_3$ ). 99% ee (determined by HPLC: Chiralcel AD-H Column, 5/95 *i*-PrOH/hexane, 0.6 mL/min, 200 nm; TR = 21.65 min (major), 17.67 min (minor)).  $^1\text{H}$  NMR (400 MHz,  $\text{CDCl}_3$ )  $\delta$  7.65 (d, 2H,  $J = 8.0$  Hz), 7.29 – 7.24 (m, 4H), 7.18 – 7.14 (m, 3H), 6.30 (dt, 1H,  $J = 2.0$  Hz,  $J = 4.4$  Hz), 5.06 (dt, 1H,  $J = 2.0$  Hz,  $J = 4.0$  Hz), 3.70 – 3.63 (m, 1H), 2.60 (t, 2H,  $J = 7.6$  Hz), 2.41 (s, 3H), 2.39 – 2.35 (m, 1H), 2.13 – 2.12 (m, 1H), 1.84 – 1.80 (m, 1H), 1.63 – 1.59 (m, 3H), 1.30 – 1.28 (m, 12H);  $^{13}\text{C}$  NMR (100 MHz,  $\text{CDCl}_3$ )  $\delta$  143.5, 142.9, 133.9, 130.4, 129.5, 128.3, 128.1, 127.5, 125.5, 111.8, 60.1, 36.2, 35.9, 35.7, 31.4, 29.4(9), 29.4(5), 29.4, 29.3, 24.6, 21.5; IR (neat): 2923, 2853, 1620, 1597, 1454, 1349, 1164, 959, 814, 722, 700; MS (ESI,  $m/z$ ) 448 ( $\text{M} + \text{Na}^+$ ); HRESIMS Calcd for  $[\text{C}_{26}\text{H}_{35}\text{NNaO}_2\text{S}]^+$  ( $\text{M} + \text{Na}^+$ ) 448.2286, found 448.2290.

**(S)-2-phenyl-1-tosyl-2,3-dihydro-1H-pyrrole (2h)**

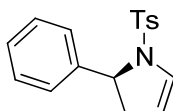

**2h**

$[\alpha]_D^{20} = -423.6^\circ$  ( $c = 1.0$ ,  $\text{CHCl}_3$ ). 99% ee (determined by HPLC: Chiralcel AS-H Column, 10/90 *i*-PrOH/hexane, 0.6 mL/min, 200 nm; TR = 36.47 min (major), 29.49 min (minor)). This compound is known and the spectroscopic data match those reported.<sup>3</sup>  $^1\text{H}$  NMR (400 MHz,  $\text{CDCl}_3$ )  $\delta$  7.62 (d, 2H,  $J = 8.0$  Hz), 7.32 – 7.23 (m, 7H), 6.52 (dt, 1H,  $J = 2.0$  Hz,  $J = 4.0$  Hz), 5.51 (dt, 1H,  $J = 1.6$  Hz,  $J = 4.0$  Hz), 4.72 (dd, 1H,  $J = 6.4$  Hz,  $J = 10.8$  Hz), 2.95 – 2.87 (m, 1H), 2.50 – 2.44 (m, 1H), 2.42 (s, 3H);  $^{13}\text{C}$  NMR (100 MHz,  $\text{CDCl}_3$ )  $\delta$  143.6, 142.7, 134.1, 130.8, 129.5, 128.5, 127.6, 127.5, 126.3, 110.0, 63.0, 40.7, 21.5.

**(S)-2-(4-fluorophenyl)-1-tosyl-2,3-dihydro-1H-pyrrole (2i)**

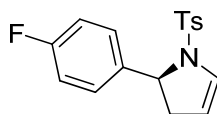

**2i**

$[\alpha]_D^{20} = -436.8^\circ$  ( $c = 1.0$ ,  $\text{CHCl}_3$ ). 99% ee (determined by HPLC: Chiralcel AS-H Column, 10/90 *i*-PrOH/hexane, 0.8 mL/min, 200 nm; TR = 26.22 min (major), 19.71 min (minor)).  $^1\text{H}$  NMR (400 MHz,  $\text{CDCl}_3$ )  $\delta$  7.61 (d, 2H,  $J = 8.0$  Hz), 7.29 – 7.25 (m, 4H), 6.98 (t, 2H,  $J = 8.4$  Hz), 6.52 (dt, 1H,  $J = 2.0$  Hz,  $J = 4.4$  Hz), 5.11 (dt, 1H,  $J = 2.0$  Hz,  $J = 4.0$  Hz), 4.71 (dd, 1H,  $J = 6.4$  Hz,  $J = 10.8$  Hz), 2.94 – 2.87 (m, 1H), 2.47 – 2.40 (m, 4H);  $^{13}\text{C}$  NMR (100 MHz,  $\text{CDCl}_3$ )  $\delta$  162.1 (d,  $J = 245.0$  Hz), 143.8, 138.5 (d,  $J = 3.2$  Hz), 134.0, 130.7, 129.6, 128.0 (d,  $J = 8.0$  Hz), 127.5, 115.3 (d,  $J = 21.0$  Hz), 109.9, 62.3, 40.6, 21.5; IR (neat): 2923, 2853, 1621, 1595, 1377, 1162, 960, 824, 663; MS (ESI,  $m/z$ ) 340 ( $\text{M} + \text{Na}^+$ ); HRESIMS Calcd for  $[\text{C}_{17}\text{H}_{16}\text{FNNaO}_2\text{S}]^+$  ( $\text{M} + \text{Na}^+$ ) 340.0783, found 340.0788.

**(S)-5-(4-chlorophenyl)-1-tosyl-2,3-dihydro-1H-pyrrole (2j)**

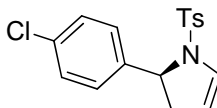

**2j**

$[\alpha]_D^{20} = -412.9^\circ$  ( $c = 1.0$ ,  $\text{CHCl}_3$ ). 97% ee (determined by HPLC: Chiralcel AS-H Column, 10/90 *i*-PrOH/hexane, 0.8 mL/min, 200 nm; TR = 30.65 min (major), 22.05 min (minor)).  $^1\text{H}$  NMR (400 MHz,  $\text{CDCl}_3$ )  $\delta$  7.60 (d, 2H,  $J = 8.0$  Hz), 7.29 – 7.23 (m, 6H), 6.51 (dt, 1H,  $J = 2.0$  Hz,  $J = 4.4$  Hz), 5.10 (dt, 1H,  $J = 2.0$  Hz,  $J = 2.4$  Hz), 4.69 (dd, 1H,  $J = 6.4$  Hz,  $J = 10.8$  Hz), 2.95 – 2.87 (m, 1H), 2.46 – 2.38 (m, 4H);  $^{13}\text{C}$  NMR (100 MHz,  $\text{CDCl}_3$ )  $\delta$  143.9, 141.2, 133.8, 133.2, 130.7, 129.6, 128.6, 127.7, 127.5, 109.9, 62.3, 40.5, 21.5; IR (neat): 2923, 2854, 1492, 1620, 1596, 1491, 1351, 1164, 961, 824, 661, 594; MS (ESI,  $m/z$ ) 356 ( $\text{M} + \text{Na}^+$ ); HRESIMS Calcd for  $[\text{C}_{17}\text{H}_{16}\text{ClNaO}_2\text{S}]^+$  ( $\text{M} + \text{Na}^+$ ) 356.0488, found 356.0485.

**(S)-2-(4-bromophenyl)-1-tosyl-2,3-dihydro-1H-pyrrole (2k)**



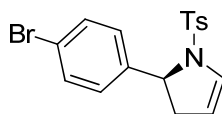

**2k**

$[\alpha]_D^{20} = -415.1^\circ$  ( $c = 1.0$ ,  $\text{CHCl}_3$ ). 98% ee (determined by HPLC: Chiralcel AD-H Column, 10/90 *i*-PrOH/hexane, 0.8 mL/min, 200 nm; TR = 26.34 min (major), 18.22 min (minor)).  $^1\text{H}$  NMR (400 MHz,  $\text{CDCl}_3$ )  $\delta$  7.60 (d, 2H,  $J = 8.4$  Hz), 7.42 (d, 2H,  $J = 8.8$  Hz), 7.28 (d, 2H,  $J = 8.0$  Hz), 7.18 (d, 2H,  $J = 8.4$  Hz), 6.51 (dt, 1H,  $J = 2.0$  Hz,  $J = 4.4$  Hz), 5.10 (dt, 1H,  $J = 2.0$  Hz,  $J = 4.4$  Hz), 4.68 (dd, 1H,  $J = 6.4$  Hz,  $J = 10.8$  Hz), 2.95 – 2.88 (m, 1H), 2.45 – 2.39 (m, 4H);  $^{13}\text{C}$  NMR (100 MHz,  $\text{CDCl}_3$ )  $\delta$  143.9, 141.7, 133.9, 131.6, 130.8, 129.6, 128.1, 127.6, 121.4, 109.8, 62.4, 40.5, 21.5; IR (neat): 2923, 2853, 1621, 1595, 1487, 1351, 1165, 961, 812, 666, 594; MS (ESI,  $m/z$ ) 400 ( $\text{M} + \text{Na}^+$ ); HRESIMS Calcd for  $[\text{C}_{17}\text{H}_{16}\text{BrNNaO}_2\text{S}]^+$  ( $\text{M} + \text{Na}^+$ ) 399.9983, found 399.9979.

**(S)-2-(2-bromophenyl)-1-tosyl-2,3-dihydro-1H-pyrrole (2l)**

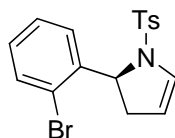

**2l**

$[\alpha]_D^{20} = -431.5^\circ$  ( $c = 1.0$ ,  $\text{CHCl}_3$ ). 96% ee (determined by HPLC: Chiralcel AS-H Column, 10/90 *i*-PrOH/hexane, 0.8 mL/min, 200 nm; TR = 26.31 min (major), 18.56 min (minor)).  $^1\text{H}$  NMR (400 MHz,  $\text{CDCl}_3$ )  $\delta$  7.70 (d, 2H,  $J = 8.0$  Hz), 7.60 (d, 1H,  $J = 8.0$  Hz), 7.51 (d, 1H,  $J = 8.0$  Hz), 7.34 – 7.31 (m, 3H), 7.15 – 7.10 (m, 1H), 6.55 (dt, 1H,  $J = 2.0$  Hz,  $J = 4.0$  Hz), 5.08 – 5.04 (m, 2H), 3.06 – 2.97 (m, 1H), 2.44 (s, 3H), 2.28 – 2.21 (m, 1H);  $^{13}\text{C}$  NMR (100 MHz,  $\text{CDCl}_3$ )  $\delta$  144.0, 142.1, 132.5, 130.8, 129.7, 128.8, 128.0, 127.8(4), 127.8(2), 121.4, 110.3, 62.0, 39.8, 21.6; IR (neat): 2922, 2855, 1622, 1594, 1470, 1435, 1347, 1159, 1098, 960, 661, 593, 548; MS (ESI,  $m/z$ ) 400 ( $\text{M} + \text{Na}^+$ ); HRESIMS Calcd for  $[\text{C}_{17}\text{H}_{16}\text{BrNNaO}_2\text{S}]^+$  ( $\text{M} + \text{Na}^+$ ) 399.9983, found 399.9977.

**(S)-2-(*p*-tolyl)-1-tosyl-2,3-dihydro-1H-pyrrole (2m)**

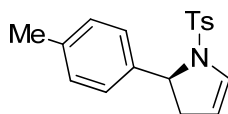

**2m**

$[\alpha]_D^{20} = -430.4^\circ$  ( $c = 1.0$ ,  $\text{CHCl}_3$ ). 97% ee (determined by HPLC: Chiralcel AS-H Column, 10/90 *i*-PrOH/hexane, 0.8 mL/min, 200 nm; TR = 28.26 min (major), 17.83 min (minor)).  $^1\text{H}$  NMR (400 MHz,  $\text{CDCl}_3$ )  $\delta$  7.61 (d, 2H,  $J = 8.4$  Hz), 7.27 (d, 2H,  $J = 8.0$  Hz), 7.21 (d, 2H,  $J = 8.0$  Hz), 7.11 (d, 2H,  $J = 8.0$  Hz), 6.51 (dt, 1H,  $J = 2.0$  Hz,  $J = 4.0$  Hz), 5.10 (dt, 1H,  $J = 1.6$  Hz,  $J = 2.4$  Hz), 4.67 (dd, 1H,  $J = 6.4$  Hz,  $J = 10.8$  Hz), 2.91 – 2.86 (m, 1H), 2.48 – 2.43 (m, 1H), 2.42 (s, 3H), 2.32 (s, 3H);  $^{13}\text{C}$  NMR (100 MHz,  $\text{CDCl}_3$ )  $\delta$  143.6, 139.7, 137.1, 134.0, 130.8, 129.5, 129.2, 127.6, 126.2, 110.0, 62.8, 40.6, 21.5, 21.1; IR (neat): 2922, 2855, 1619, 1597, 1515, 1350, 1163, 961, 811, 725, 706, 662, 594; MS (ESI,  $m/z$ ) 336 ( $\text{M} + \text{Na}^+$ ); HRESIMS Calcd for  $[\text{C}_{18}\text{H}_{19}\text{NNaO}_2\text{S}]^+$  ( $\text{M} + \text{Na}^+$ ) 336.1034, found 336.1032.

**(S)-2-(4-methoxyphenyl)-1-tosyl-2,3-dihydro-1H-pyrrole (2n)**

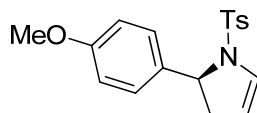

**2n**

$[\alpha]_D^{20} = -405.8^\circ$  ( $c = 1.0$ ,  $\text{CHCl}_3$ ). 98% ee (determined by HPLC: Chiralcel AS-H Column, 10/90 *i*-PrOH/hexane, 0.8 mL/min, 200 nm; TR = 63.94 min (major), 41.79 min (minor)).  $^1\text{H}$  NMR (400 MHz,  $\text{CDCl}_3$ )  $\delta$  7.60 (d, 2H,  $J = 8.4$  Hz), 7.28 – 7.22 (m, 4H), 6.84 – 6.82 (m, 2H), 6.50 (dt, 1H,  $J = 2.0$  Hz,  $J = 4.0$  Hz), 5.10 (dt, 1H,  $J = 1.6$  Hz,  $J = 4.0$  Hz), 4.68 (dd, 1H,  $J = 6.4$  Hz,  $J = 10.8$  Hz), 3.79 (s, 3H), 2.92 – 2.84 (m, 1H), 2.49 – 2.43 (m, 1H), 2.42 (s, 3H);  $^{13}\text{C}$  NMR (100 MHz,  $\text{CDCl}_3$ )  $\delta$  159.0, 143.5, 134.8, 134.2, 130.7, 129.5, 127.5, 113.9, 109.9, 62.6, 55.2, 40.6, 21.5; IR (neat): 2925, 2854, 1614, 1597, 1513, 1353, 1166, 963, 814, 708, 667, 599, 547 MS (ESI,  $m/z$ ) 352 ( $\text{M} + \text{Na}^+$ ); HRESIMS Calcd for  $[\text{C}_{18}\text{H}_{19}\text{NNaO}_3\text{S}]^+$  ( $\text{M} + \text{Na}^+$ ) 352.0983, found 352.0977.

**(S)-2-(naphthalen-1-yl)-1-tosyl-2,3-dihydro-1H-pyrrole (2o)**

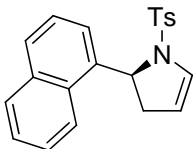

**2o**

$[\alpha]_D^{20} = -476.1^\circ$  ( $c = 1.0$ ,  $\text{CHCl}_3$ ). 98% ee (determined by Chiralcel AS-H Column, 2/98 *i*-PrOH/hexane, 0.8 mL/min, 200 nm; TR = 71.93 min (major), 64.87 min (minor)).  $^1\text{H}$  NMR (400 MHz,  $\text{CDCl}_3$ )  $\delta$  7.86 – 7.84 (m, 1H), 7.79 – 7.74 (m, 2H), 7.66 (d, 1H,  $J = 6.8$  Hz), 7.61 (d, 2H,  $J = 8.4$  Hz), 7.47 – 7.42 (m, 3H), 7.23 (d, 2H,  $J = 7.6$  Hz), 6.65 (dt, 1H,  $J = 2.0$  Hz,  $J = 4.4$  Hz), 5.38 (dd, 1H,  $J = 6.4$  Hz,  $J = 10.8$  Hz), 5.15 (dt, 1H,  $J = 2.0$  Hz,  $J = 4.0$  Hz), 3.14 – 3.05 (m, 1H), 2.50 – 2.46 (m, 1H), 2.39 (s, 3H);  $^{13}\text{C}$  NMR (100 MHz,  $\text{CDCl}_3$ )  $\delta$  143.7, 137.5, 134.1, 130.9, 129.5, 129.0, 128.1, 127.6, 126.0, 125.5, 125.4, 124.3, 122.9, 110.4, 61.0, 40.2, 21.5; IR (neat): 2925, 2854, 1621, 1596, 1352, 959, 904, 814, 799, 775, 705, 666, 595; MS (ESI,  $m/z$ ) 372 ( $\text{M} + \text{Na}^+$ ); HRESIMS Calcd for  $[\text{C}_{21}\text{H}_{19}\text{NNaO}_2\text{S}]^+$  ( $\text{M} + \text{Na}^+$ ) 372.1034, found 372.1027.

**(S)-2-heptyl-1-tosyl-2,3-dihydro-1H-pyrrole (2a')**

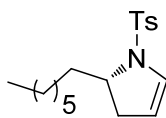

**2a'**

$[\alpha]_D^{20} = +438.5^\circ$  ( $c = 1.0$ ,  $\text{CHCl}_3$ ). 99% ee (determined by HPLC: Chiralcel AS-H Column, 2/98 *i*-PrOH /hexane, 0.6 mL/min, 200 nm; TR = 17.37 min (major), 20.09 min (minor)).

**(R)-1-(4-bromophenylsulfonyl)-2-heptyl-2,3-dihydro-1H-pyrrole (2p)**

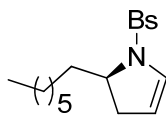

**2p**

$[\alpha]_D^{20} = -395.0^\circ$  ( $c = 1.0$ ,  $\text{CHCl}_3$ ). 99% ee (determined by Chiralcel AS-H Column, 2/98 *i*-PrOH/hexane, 0.6 mL/min, 200 nm; TR = 18.71 min (major), 14.93 min (minor)).  $^1\text{H}$  NMR (400 MHz,  $\text{CDCl}_3$ )  $\delta$  7.70 – 7.64 (m, 4H), 6.30 – 6.28 (m, 1H), 5.12 (dt, 1H,  $J = 2.0$  Hz,  $J = 4.4$  Hz), 3.66 (dt, 1H,  $J = 1.6$  Hz,  $J = 4.0$  Hz), 2.49 – 2.39 (m, 1H), 2.20 – 2.12 (m, 1H), 1.84 – 1.78 (m, 1H), 1.65 – 1.57 (m, 1H), 1.35 – 1.15 (m, 10H), 0.88 (t, 3H,  $J = 7.6$  Hz);  $^{13}\text{C}$  NMR (100 MHz,  $\text{CDCl}_3$ )  $\delta$  135.8, 132.4, 130.0, 128.9, 127.8, 112.5, 60.2, 36.1, 35.7, 31.8, 29.4, 29.2, 24.5, 22.6, 14.0; IR (neat): 2957, 2926, 2856, 1619, 1574, 1552, 1467, 1406, 1387, 1356, 1171, 1072, 1008, 823; MS (ESI,  $m/z$ ) 408 ( $\text{M} + \text{Na}^+$ ); HRESIMS Calcd for  $[\text{C}_{17}\text{H}_{24}\text{BrNNaO}_2\text{S}]^+$  ( $\text{M} + \text{Na}^+$ ) 408.0609, found 408.0607.

**(R)-2-heptyl-1-(2-nitrophenylsulfonyl)-2,3-dihydro-1H-pyrrole (2q)**

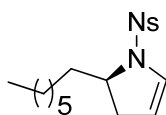

**2q**

$[\alpha]_D^{20} = -303.0^\circ$  ( $c = 1.0$ ,  $\text{CHCl}_3$ ). 99% ee (determined by Chiralcel AS-H Column, 10/90 *i*-PrOH/hexane, 0.8 mL/min, 200 nm; TR = 15.89 min (major), 13.01 min (minor)).  $^1\text{H}$  NMR (400 MHz,  $\text{CDCl}_3$ )  $\delta$  7.94 – 7.90 (m, 1H), 7.73 – 7.65 (m, 2H), 7.60 – 7.57 (m, 1H), 6.37 (dt, 1H,  $J = 1.6$  Hz,  $J = 3.6$  Hz), 5.17 (dt, 1H,  $J = 2.4$  Hz,  $J = 4.0$  Hz), 4.18 – 4.08 (m, 1H), 2.73 – 2.64 (m, 1H), 2.31 – 2.24 (m, 1H), 1.82 – 1.73 (m, 1H), 1.66 – 1.57 (m, 1H), 1.36 – 1.18 (m, 10H), 0.88 (t, 3H,  $J = 7.6$  Hz);  $^{13}\text{C}$  NMR (100 MHz,  $\text{CDCl}_3$ )  $\delta$  148.7, 133.7, 131.3, 130.9, 130.3, 129.6, 123.9, 111.4, 60.4, 35.8, 35.7, 31.7, 29.4, 29.2, 24.3, 22.6, 14.0; IR (neat): 2925, 2856, 1627, 1598, 1358, 1340, 1172, 1156, 812, 706, 673, 589; MS (ESI,  $m/z$ ) 375 ( $\text{M} + \text{Na}^+$ ); HRESIMS Calcd for  $[\text{C}_{17}\text{H}_{24}\text{N}_2\text{NaO}_4\text{S}]^+$  ( $\text{M} + \text{Na}^+$ ) 375.1354, found 375.1347.

**(R)-2-butyl-2-methyl-1-tosyl-2,3-dihydro-1H-pyrrole (2r)**

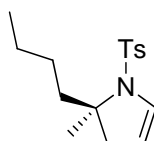

## 2r

$[\alpha]_D^{20} = -46.5^\circ$  ( $c = 1.0$ ,  $\text{CHCl}_3$ ). 93% ee (determined by HPLC: Chiralcel AD-H Column, 2/98 *i*-PrOH/hexane, 0.6 mL/min, 200 nm; TR = 17.25 min (major), 15.85 min (minor)).  $^1\text{H}$  NMR (400 MHz,  $\text{CDCl}_3$ )  $\delta$  7.70 (d, 2H,  $J = 8.0$  Hz), 7.26 (d, 2H,  $J = 8.0$  Hz), 6.46 – 6.44 (m, 1H), 4.93 – 4.91 (m, 1H), 2.64 – 2.61 (m, 1H), 2.41 (s, 3H), 2.35 – 2.31 (m, 1H), 1.91 – 1.85 (m, 1H), 1.67 – 1.61 (m, 1H), 1.32 – 1.22 (m, 7H), 0.86 (t, 3H,  $J = 6.5$  Hz);  $^{13}\text{C}$  NMR (125 MHz,  $\text{CDCl}_3$ )  $\delta$  142.8, 139.9, 130.6, 129.5, 126.6, 105.5, 69.8, 44.2, 41.1, 26.6, 26.2, 22.9, 22.4, 14.0; IR (neat): 2925, 2856, 1627, 1598, 1358, 1340, 1172, 1156, 812, 706, 673, 589; MS (ESI,  $m/z$ ) 316 ( $\text{M} + \text{Na}^+$ ); HRESIMS Calcd for  $[\text{C}_{16}\text{H}_{23}\text{NNaO}_2\text{S}]^+$  ( $\text{M} + \text{Na}^+$ ) 316.1347, found 316.1342.

Compound (**2a'**)

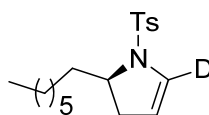

## 2a'

$^1\text{H}$  NMR (400 MHz,  $\text{CDCl}_3$ )  $\delta$  7.66 (d, 2H,  $J = 8.4$  Hz), 7.30 (d, 2H,  $J = 8.4$  Hz), 6.32 – 6.30 (m, 0.12H), 5.08 – 5.06 (m, 1H), 3.70 – 3.63 (m, 1H), 2.42 (s, 3H), 2.41 – 2.36 (m, 1H), 2.15 – 2.09 (m, 1H), 1.87 – 1.79 (m, 1H), 1.66 – 1.53 (m, 1H), 1.37 – 1.22 (m, 10H), 0.89 (t, 3H,  $J = 6.4$  Hz);  $^{13}\text{C}$  NMR (100 MHz,  $\text{CDCl}_3$ )  $\delta$  143.5, 133.8, 130.4, 129.5, 127.6, 111.9, 60.1, 36.2, 35.7, 31.8, 29.4, 29.2, 24.6, 22.6, 21.5, 14.1.

## Reference:

- (a) Shu, C.; Li, L.; Yu, Y.-F.; Jiang, S.; Ye, L.-W. *Chem. Commun.* **2014**, 50, 2522.  
(b) Shu, C.; Liu, M.-Q.; Wang, S.-S.; Li, L.; Ye, L.-W. *J. Org. Chem.* **2013**, 78, 3292.  
(c) Yu, Y.-F.; Shu, C.; Shen, C.-H.; Li, T.-Y.; Ye, L.-W. *Chem. Asian J.* **2013**, 8, 2920.
- García-Muñoz, M. J.; Zacconi, F.; Foubelo, F.; Yus, M. *Eur. J. Org. Chem.* **2013**, 1287.
- Wisniewska, H. M.; Jarvo, E. R. *Chem. Sci.* **2011**, 2, 807.

Compound **1r**

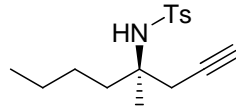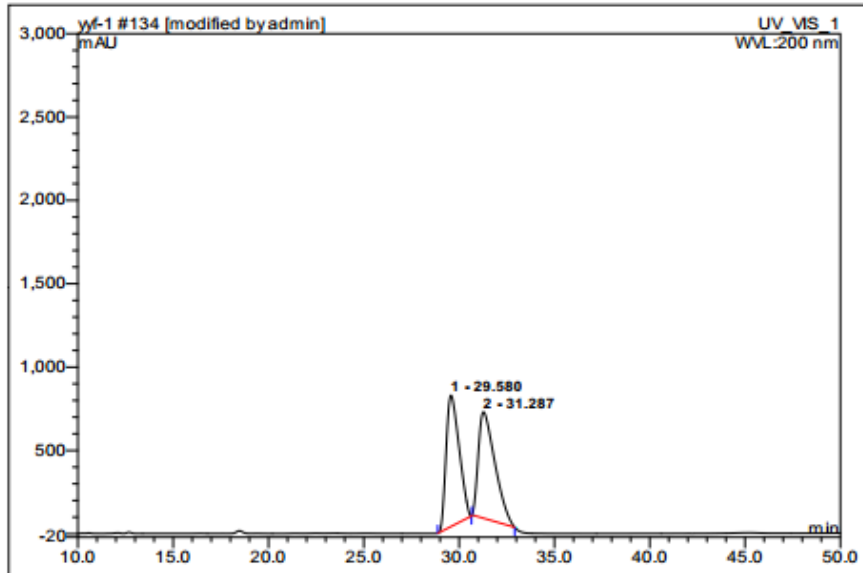

| No.           | Ret.Time<br>min | Peak Name | Height<br>mAU | Area<br>mAU*min | Rel.Area<br>% | Amount | Type |
|---------------|-----------------|-----------|---------------|-----------------|---------------|--------|------|
| 1             | 29.58           | n.a.      | 786.287       | 621.525         | 49.06         | n.a.   | BMB* |
| 2             | 31.29           | n.a.      | 637.216       | 645.281         | 50.94         | n.a.   | BMB* |
| <b>Total:</b> |                 |           | 1423.503      | 1266.805        | 100.00        | 0.000  |      |

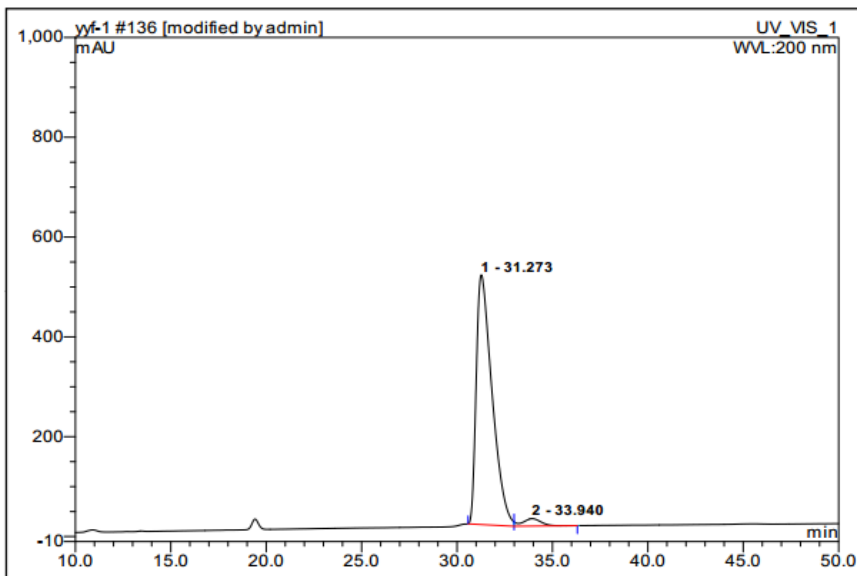

| No.           | Ret.Time<br>min | Peak Name | Height<br>mAU | Area<br>mAU*min | Rel.Area<br>% | Amount | Type |
|---------------|-----------------|-----------|---------------|-----------------|---------------|--------|------|
| 1             | 31.27           | n.a.      | 500.139       | 480.745         | 96.59         | n.a.   | BM * |
| 2             | 33.94           | n.a.      | 14.944        | 16.957          | 3.41          | n.a.   | MB*  |
| <b>Total:</b> |                 |           | 515.083       | 497.702         | 100.00        | 0.000  |      |

Compound 2a

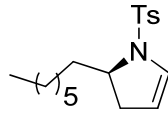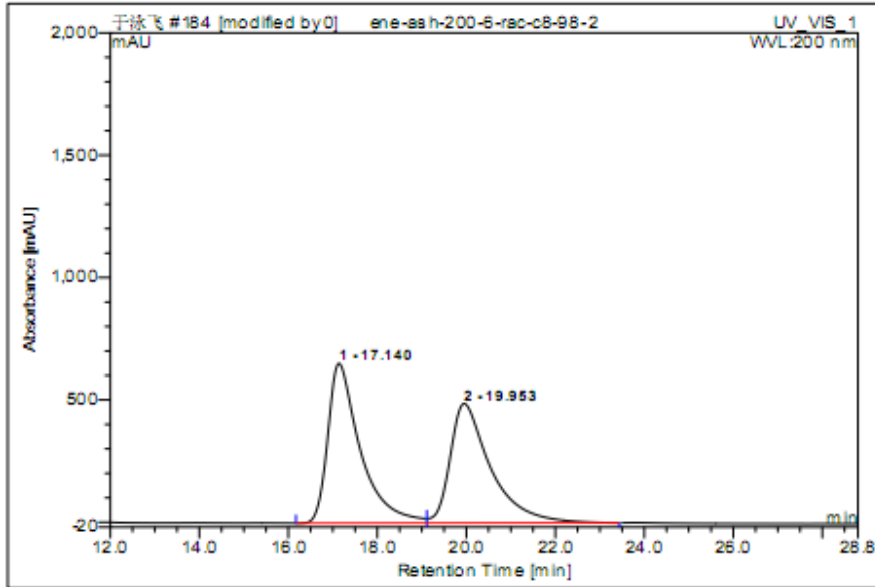

| No.           | Ret.Time<br>min | Peak Name | Height<br>mAU | Area<br>mAU*min | Rel.Area<br>% | Amount | Type |
|---------------|-----------------|-----------|---------------|-----------------|---------------|--------|------|
| 1             | 17.14           | n.a.      | 653.050       | 552.804         | 51.76         | n.a.   | BM*  |
| 2             | 19.95           | n.a.      | 488.036       | 515.241         | 48.24         | n.a.   | MB*  |
| <b>Total:</b> |                 |           | 1141.086      | 1068.044        | 100.00        | 0.000  |      |

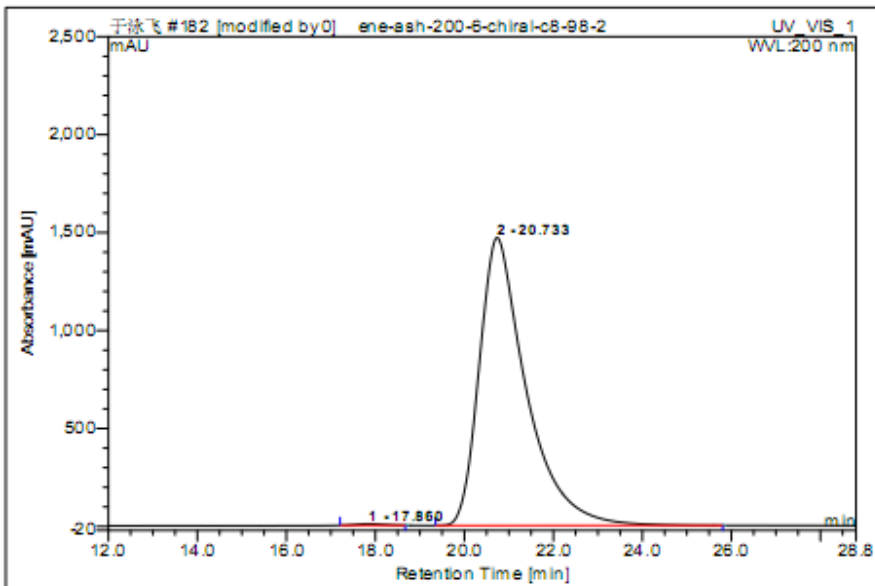

| No.           | Ret.Time<br>min | Peak Name | Height<br>mAU | Area<br>mAU*min | Rel.Area<br>% | Amount | Type |
|---------------|-----------------|-----------|---------------|-----------------|---------------|--------|------|
| 1             | 17.86           | n.a.      | 7.700         | 5.442           | 0.30          | n.a.   | BMB* |
| 2             | 20.73           | n.a.      | 1469.200      | 1793.221        | 99.70         | n.a.   | BMB* |
| <b>Total:</b> |                 |           | 1476.900      | 1798.663        | 100.00        | 0.000  |      |

Compound **2b**

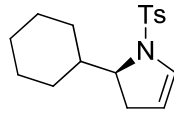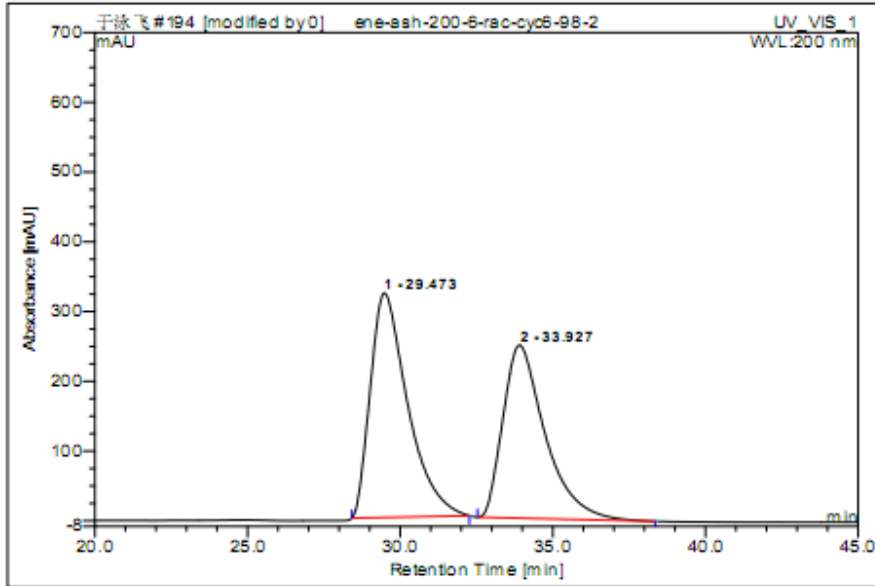

| No.           | Ret.Time<br>min | Peak Name | Height<br>mAU | Area<br>mAU*min | Rel.Area<br>% | Amount | Type |
|---------------|-----------------|-----------|---------------|-----------------|---------------|--------|------|
| 1             | 29.47           | n.a.      | 321.927       | 455.190         | 53.41         | n.a.   | BMB* |
| 2             | 33.93           | n.a.      | 248.172       | 397.020         | 46.59         | n.a.   | BMB* |
| <b>Total:</b> |                 |           | 570.099       | 852.210         | 100.00        | 0.000  |      |

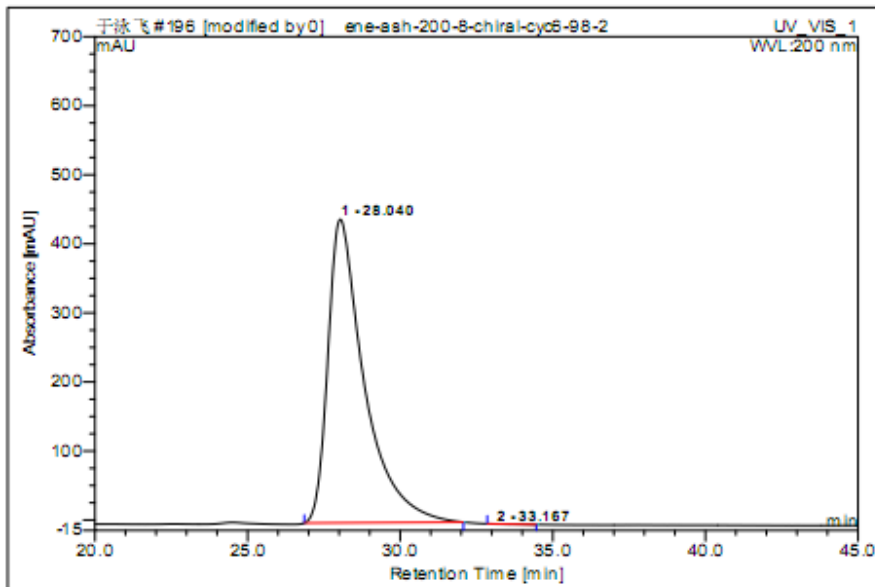

| No.           | Ret.Time<br>min | Peak Name | Height<br>mAU | Area<br>mAU*min | Rel.Area<br>% | Amount | Type |
|---------------|-----------------|-----------|---------------|-----------------|---------------|--------|------|
| 1             | 28.04           | n.a.      | 439.434       | 606.485         | 99.99         | n.a.   | BMB* |
| 2             | 33.17           | n.a.      | 0.214         | 0.089           | 0.01          | n.a.   | BMB* |
| <b>Total:</b> |                 |           | 439.649       | 606.574         | 100.00        | 0.000  |      |



Compound 2c

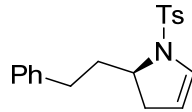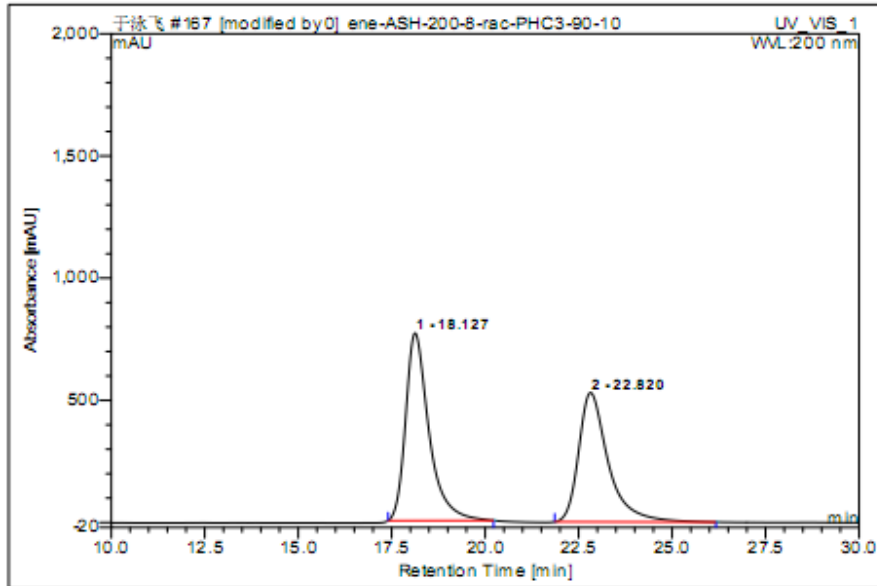

| No.           | Ret.Time min | Peak Name | Height mAU      | Area mAU*min    | Rel.Area %    | Amount       | Type |
|---------------|--------------|-----------|-----------------|-----------------|---------------|--------------|------|
| 1             | 18.13        | n.a.      | 767.113         | 557.216         | 53.38         | n.a.         | BMB* |
| 2             | 22.82        | n.a.      | 528.733         | 486.601         | 46.62         | n.a.         | BMB* |
| <b>Total:</b> |              |           | <b>1295.846</b> | <b>1043.817</b> | <b>100.00</b> | <b>0.000</b> |      |

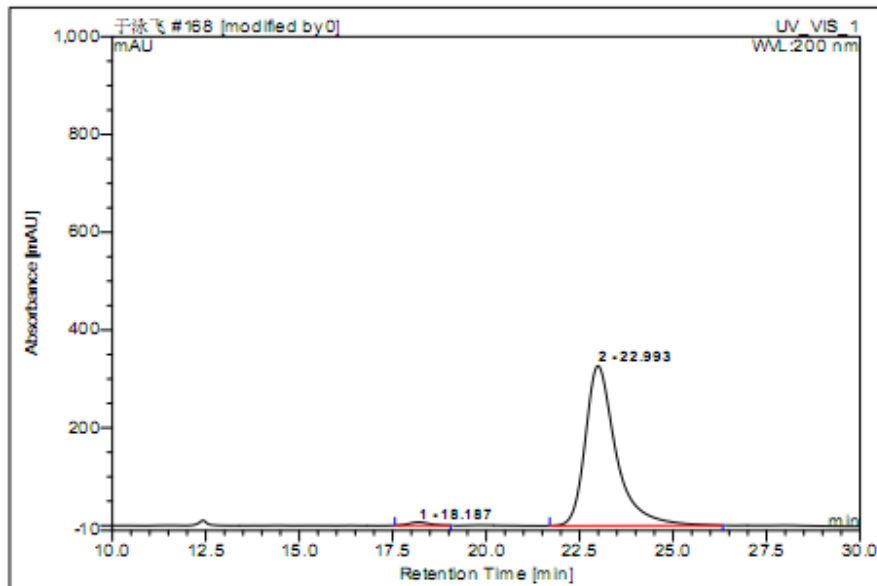

| No.           | Ret.Time min | Peak Name | Height mAU     | Area mAU*min   | Rel.Area %    | Amount       | Type |
|---------------|--------------|-----------|----------------|----------------|---------------|--------------|------|
| 1             | 18.19        | n.a.      | 6.797          | 4.296          | 1.36          | n.a.         | BMB* |
| 2             | 22.99        | n.a.      | 326.967        | 312.353        | 98.64         | n.a.         | BMB  |
| <b>Total:</b> |              |           | <b>333.764</b> | <b>316.649</b> | <b>100.00</b> | <b>0.000</b> |      |

Compound **2d**

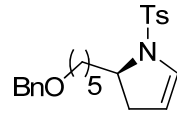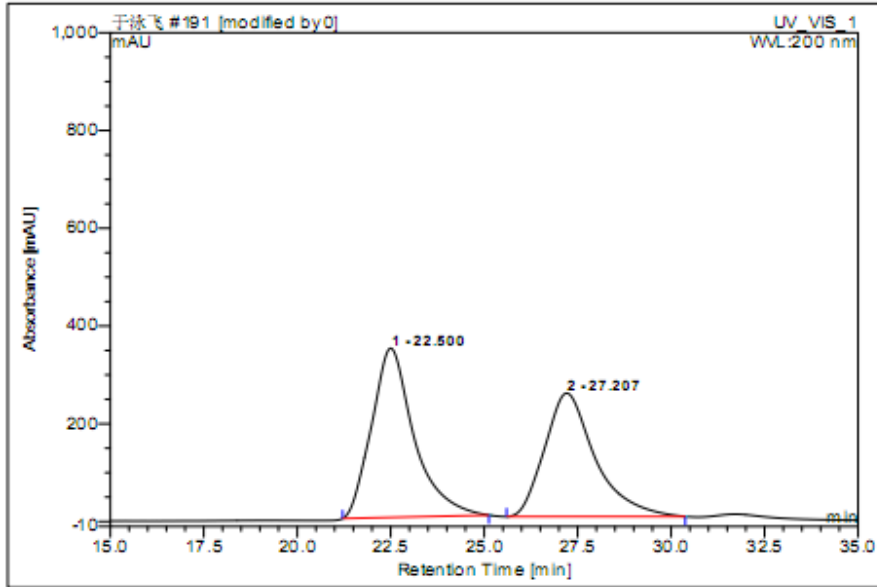

| No.           | Ret.Time<br>min | Peak Name | Height<br>mAU | Area<br>mAU*min | Rel.Area<br>% | Amount | Type |
|---------------|-----------------|-----------|---------------|-----------------|---------------|--------|------|
| 1             | 22.50           | n.a.      | 345.968       | 455.526         | 53.53         | n.a.   | BMB* |
| 2             | 27.21           | n.a.      | 252.437       | 395.404         | 46.47         | n.a.   | BMB* |
| <b>Total:</b> |                 |           | 598.406       | 850.930         | 100.00        | 0.000  |      |

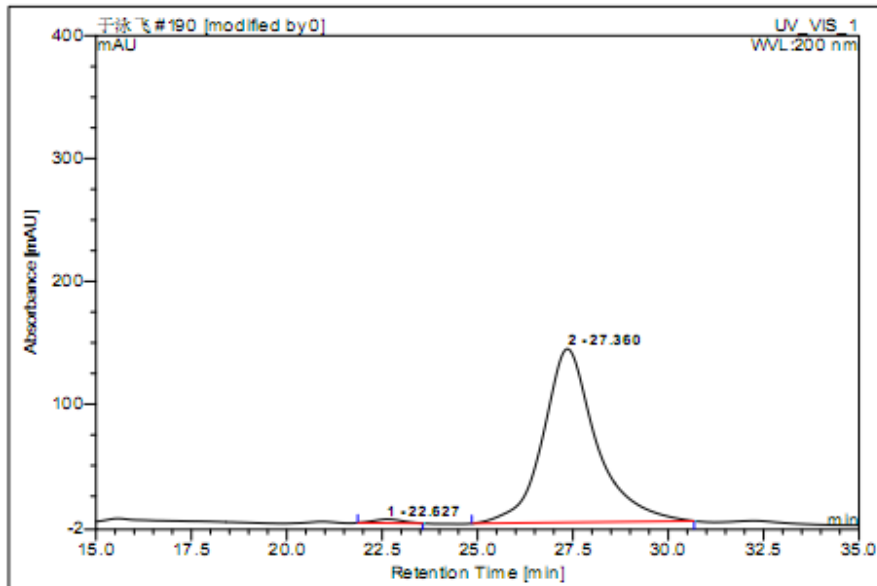

| No.           | Ret.Time<br>min | Peak Name | Height<br>mAU | Area<br>mAU*min | Rel.Area<br>% | Amount | Type |
|---------------|-----------------|-----------|---------------|-----------------|---------------|--------|------|
| 1             | 22.63           | n.a.      | 3.179         | 2.751           | 1.19          | n.a.   | BMB* |
| 2             | 27.36           | n.a.      | 141.308       | 228.162         | 98.81         | n.a.   | BMB* |
| <b>Total:</b> |                 |           | 144.487       | 230.913         | 100.00        | 0.000  |      |

Compound 2e

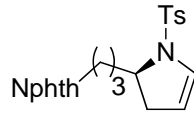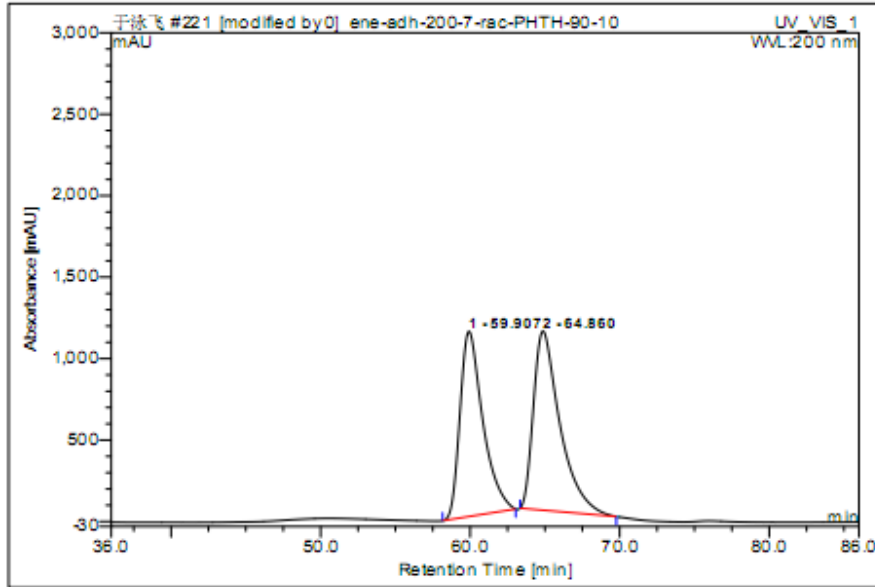

| No.           | Ret.Time min | Peak Name | Height mAU | Area mAU*min | Rel.Area % | Amount | Type |
|---------------|--------------|-----------|------------|--------------|------------|--------|------|
| 1             | 59.91        | n.a.      | 1136.119   | 2012.106     | 47.11      | n.a.   | BMB* |
| 2             | 64.86        | n.a.      | 1099.132   | 2259.022     | 52.89      | n.a.   | BMB* |
| <b>Total:</b> |              |           | 2235.251   | 4271.128     | 100.00     | 0.000  |      |

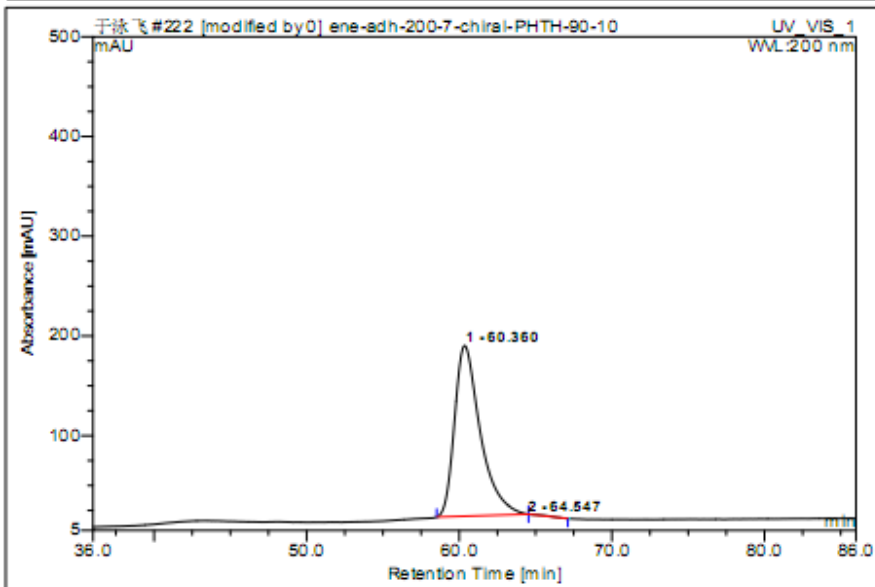

| No.           | Ret.Time min | Peak Name | Height mAU | Area mAU*min | Rel.Area % | Amount | Type |
|---------------|--------------|-----------|------------|--------------|------------|--------|------|
| 1             | 60.36        | n.a.      | 170.950    | 334.165      | 99.91      | n.a.   | BMB* |
| 2             | 64.55        | n.a.      | 0.008      | 0.315        | 0.09       | n.a.   | bMB* |
| <b>Total:</b> |              |           | 170.958    | 334.480      | 100.00     | 0.000  |      |

Compound 2f

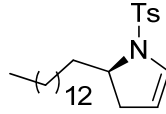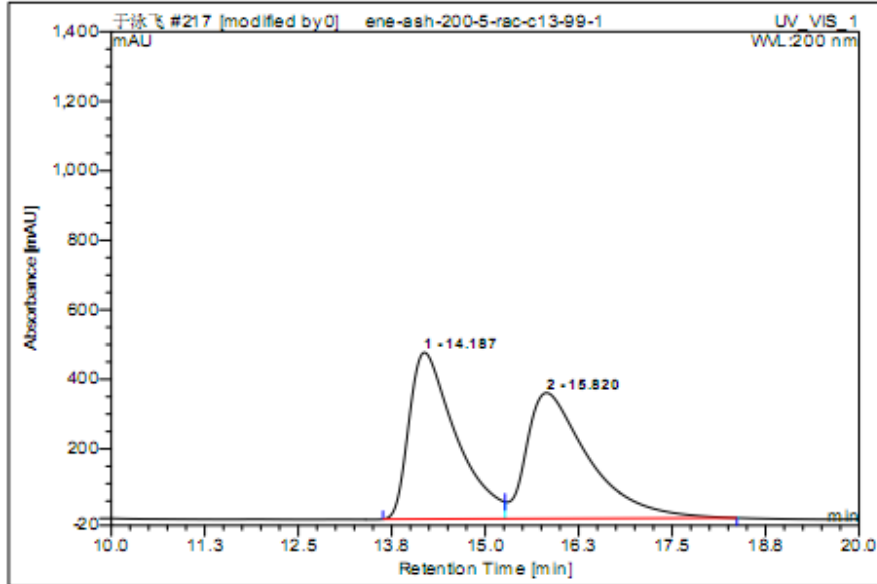

| No.           | Ret.Time min | Peak Name | Height mAU | Area mAU*min | Rel.Area % | Amount | Type |
|---------------|--------------|-----------|------------|--------------|------------|--------|------|
| 1             | 14.19        | n.a.      | 478.861    | 347.352      | 49.97      | n.a.   | BM*  |
| 2             | 15.82        | n.a.      | 361.754    | 347.816      | 50.03      | n.a.   | MB*  |
| <b>Total:</b> |              |           | 840.614    | 695.168      | 100.00     | 0.000  |      |

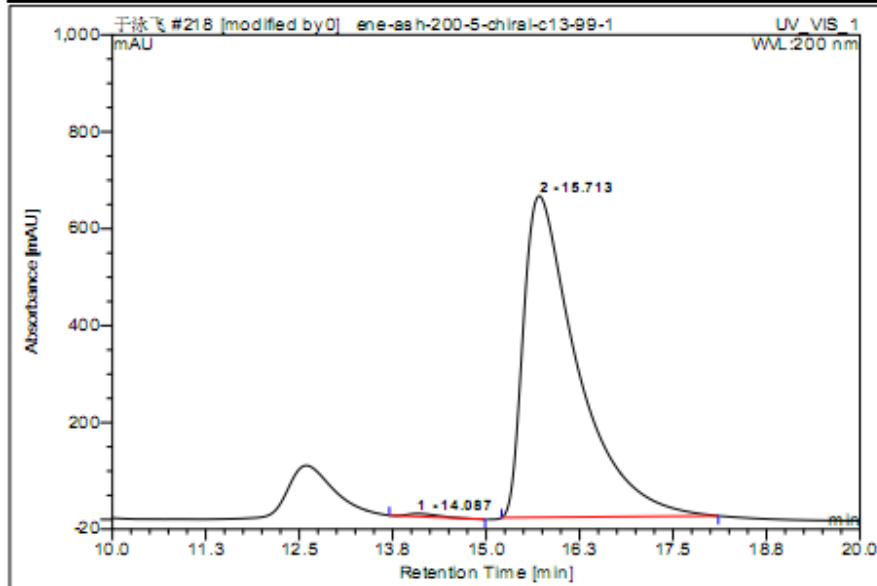

| No.           | Ret.Time min | Peak Name | Height mAU | Area mAU*min | Rel.Area % | Amount | Type |
|---------------|--------------|-----------|------------|--------------|------------|--------|------|
| 1             | 14.09        | n.a.      | 6.032      | 2.705        | 0.49       | n.a.   | BMB* |
| 2             | 15.71        | n.a.      | 663.076    | 554.010      | 99.51      | n.a.   | BMB* |
| <b>Total:</b> |              |           | 669.107    | 556.715      | 100.00     | 0.000  |      |

Compound 2g

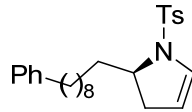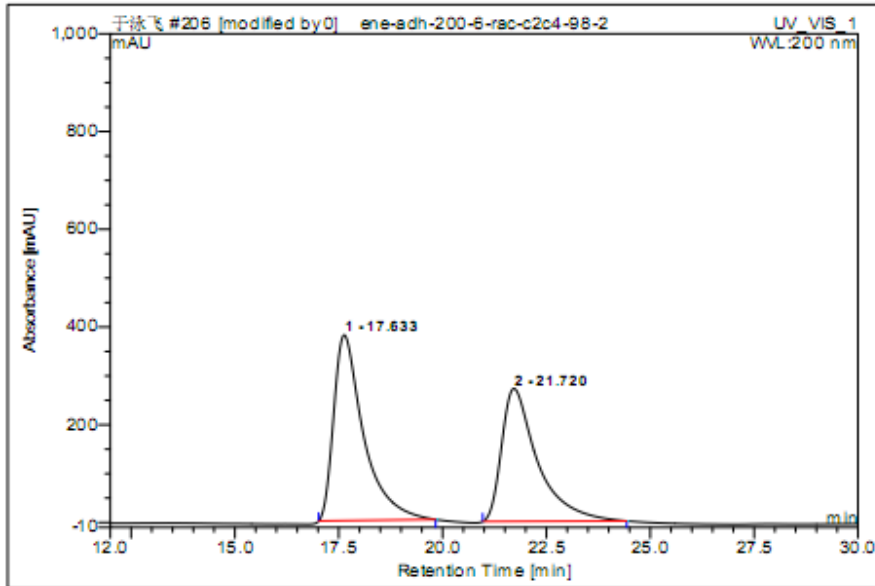

| No.           | Ret.Time min | Peak Name | Height mAU     | Area mAU*min   | Rel.Area %    | Amount       | Type |
|---------------|--------------|-----------|----------------|----------------|---------------|--------------|------|
| 1             | 17.63        | n.a.      | 379.623        | 317.179        | 53.81         | n.a.         | BMB* |
| 2             | 21.72        | n.a.      | 271.874        | 272.294        | 46.19         | n.a.         | BMB* |
| <b>Total:</b> |              |           | <b>651.497</b> | <b>589.472</b> | <b>100.00</b> | <b>0.000</b> |      |

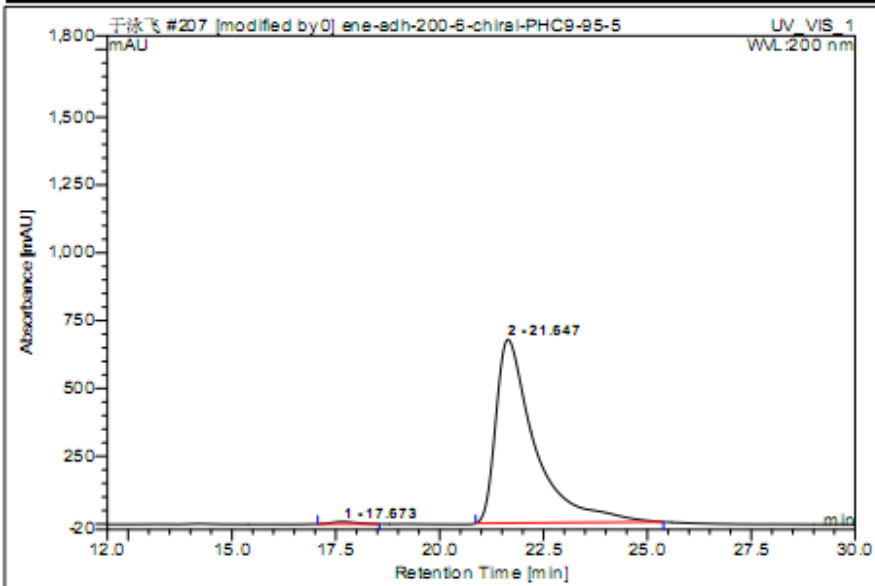

| No.           | Ret.Time min | Peak Name | Height mAU     | Area mAU*min   | Rel.Area %    | Amount       | Type |
|---------------|--------------|-----------|----------------|----------------|---------------|--------------|------|
| 1             | 17.67        | n.a.      | 8.185          | 5.640          | 0.76          | n.a.         | BMB* |
| 2             | 21.65        | n.a.      | 676.536        | 732.620        | 99.24         | n.a.         | BMB* |
| <b>Total:</b> |              |           | <b>684.721</b> | <b>738.261</b> | <b>100.00</b> | <b>0.000</b> |      |

Compound **2h**

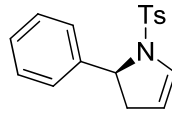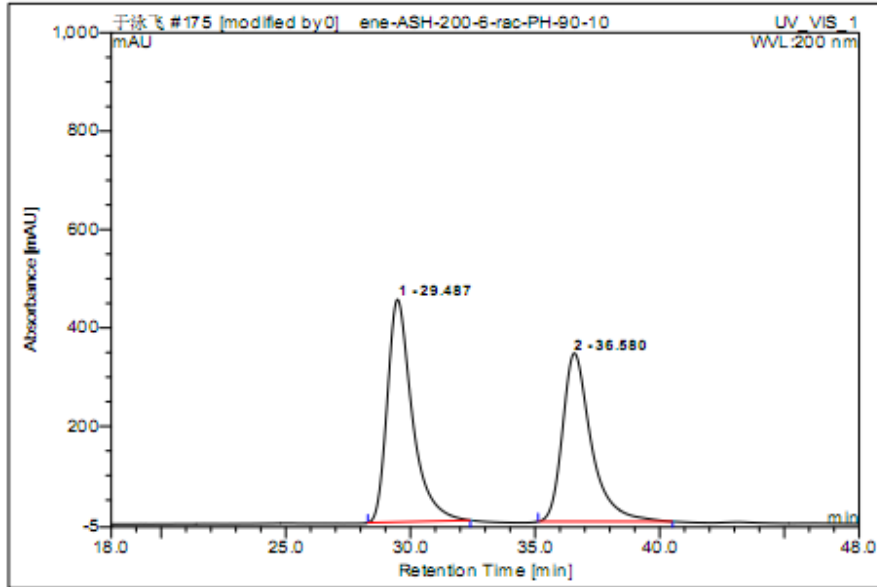

| No.           | Ret.Time min | Peak Name | Height mAU | Area mAU*min | Rel.Area % | Amount | Type |
|---------------|--------------|-----------|------------|--------------|------------|--------|------|
| 1             | 29.49        | n.a.      | 452.422    | 525.044      | 53.41      | n.a.   | BMB* |
| 2             | 36.58        | n.a.      | 342.146    | 457.969      | 46.59      | n.a.   | BMB* |
| <b>Total:</b> |              |           | 794.568    | 983.013      | 100.00     | 0.000  |      |

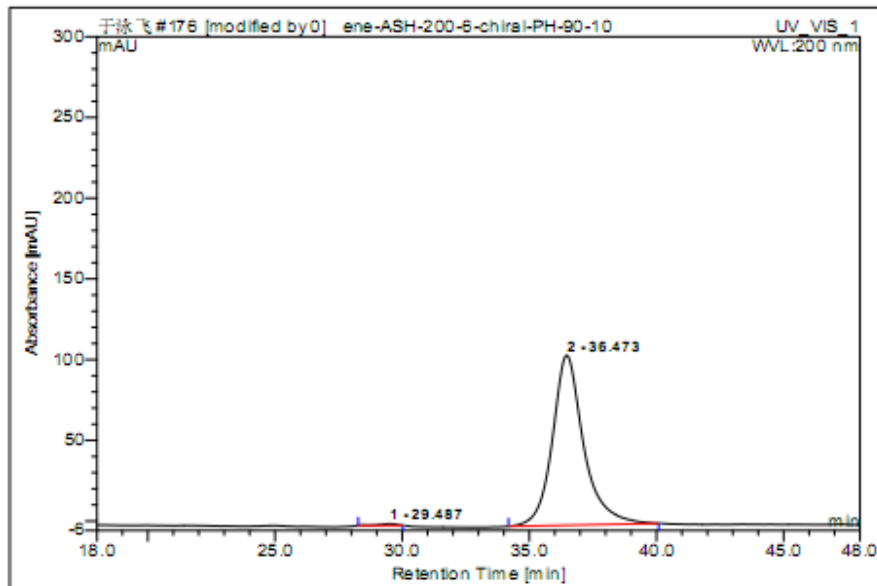

| No.           | Ret.Time min | Peak Name | Height mAU | Area mAU*min | Rel.Area % | Amount | Type |
|---------------|--------------|-----------|------------|--------------|------------|--------|------|
| 1             | 29.49        | n.a.      | 1.115      | 0.851        | 0.56       | n.a.   | BMB* |
| 2             | 36.47        | n.a.      | 105.260    | 150.153      | 99.44      | n.a.   | BMB* |
| <b>Total:</b> |              |           | 106.375    | 151.003      | 100.00     | 0.000  |      |

Compound 2i

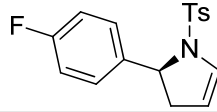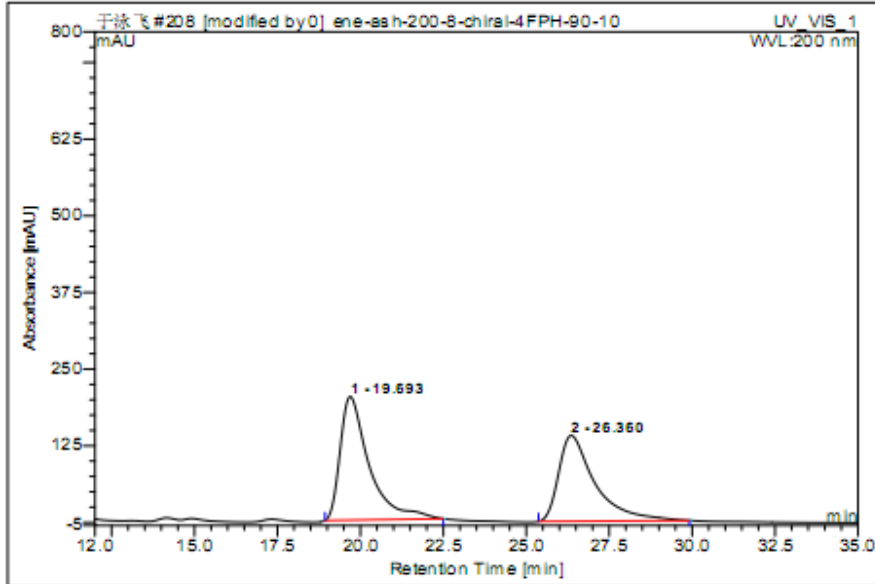

| No.           | Ret.Time<br>min | Peak Name | Height<br>mAU | Area<br>mAU*min | Rel.Area<br>% | Amount | Type |
|---------------|-----------------|-----------|---------------|-----------------|---------------|--------|------|
| 1             | 19.69           | n.a.      | 201.499       | 204.078         | 53.52         | n.a.   | BMB* |
| 2             | 26.36           | n.a.      | 139.908       | 177.257         | 46.48         | n.a.   | BMB* |
| <b>Total:</b> |                 |           | 341.407       | 381.335         | 100.00        | 0.000  |      |

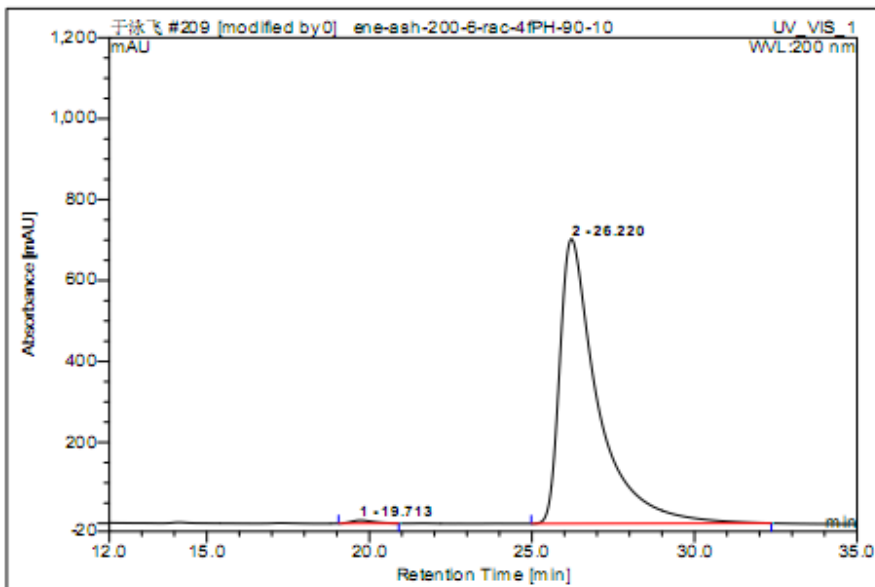

| No.           | Ret.Time<br>min | Peak Name | Height<br>mAU | Area<br>mAU*min | Rel.Area<br>% | Amount | Type |
|---------------|-----------------|-----------|---------------|-----------------|---------------|--------|------|
| 1             | 19.71           | n.a.      | 7.647         | 6.036           | 0.63          | n.a.   | BMB* |
| 2             | 26.22           | n.a.      | 703.150       | 949.130         | 99.37         | n.a.   | BMB  |
| <b>Total:</b> |                 |           | 710.797       | 955.166         | 100.00        | 0.000  |      |

Compound 2j

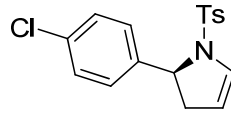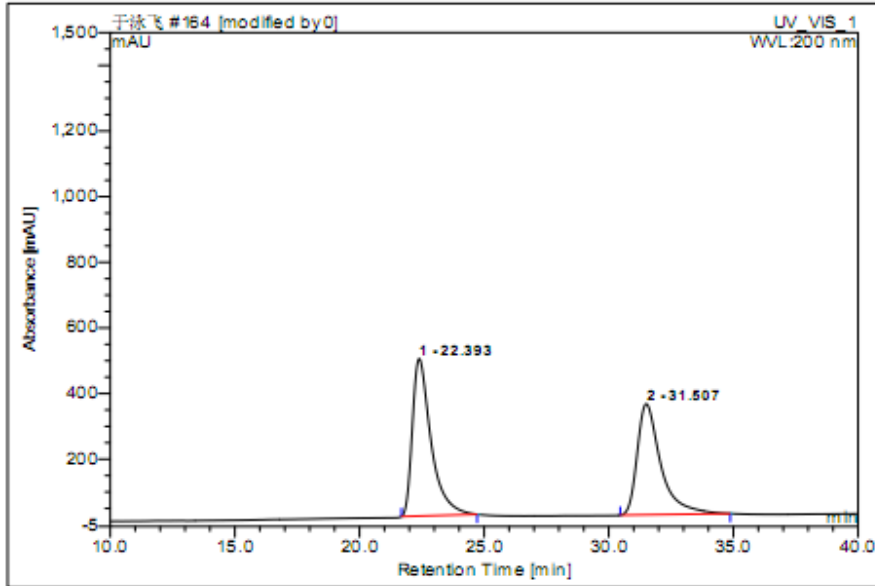

| No.           | Ret.Time min | Peak Name | Height mAU | Area mAU*min | Rel.Area % | Amount | Type |
|---------------|--------------|-----------|------------|--------------|------------|--------|------|
| 1             | 22.39        | n.a.      | 479.394    | 416.341      | 52.94      | n.a.   | BMB* |
| 2             | 31.51        | n.a.      | 337.730    | 370.112      | 47.06      | n.a.   | BMB* |
| <b>Total:</b> |              |           | 817.125    | 786.452      | 100.00     | 0.000  |      |

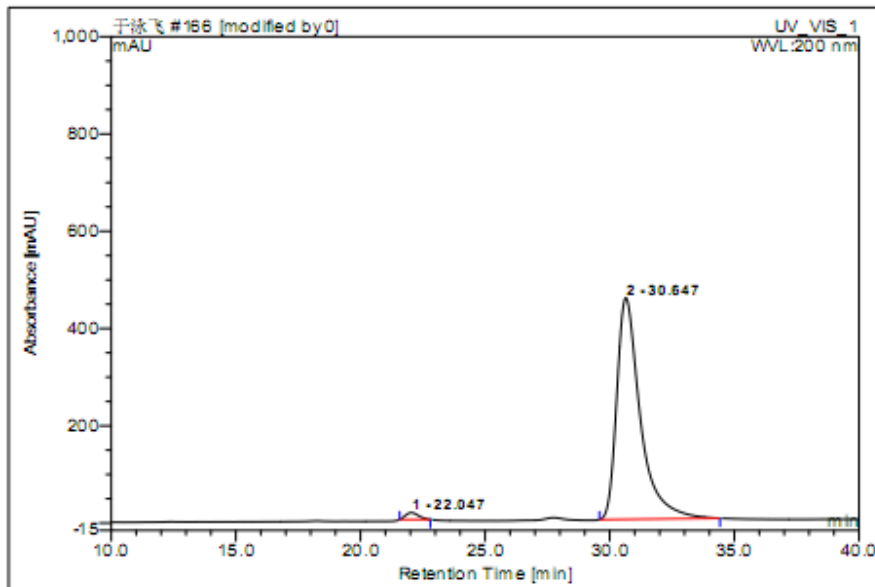

| No.           | Ret.Time min | Peak Name | Height mAU | Area mAU*min | Rel.Area % | Amount | Type |
|---------------|--------------|-----------|------------|--------------|------------|--------|------|
| 1             | 22.05        | n.a.      | 14.100     | 8.576        | 1.69       | n.a.   | BMB* |
| 2             | 30.65        | n.a.      | 455.385    | 498.925      | 98.31      | n.a.   | BMB* |
| <b>Total:</b> |              |           | 469.485    | 507.501      | 100.00     | 0.000  |      |



Compound 2k

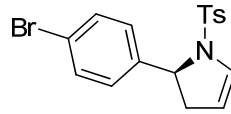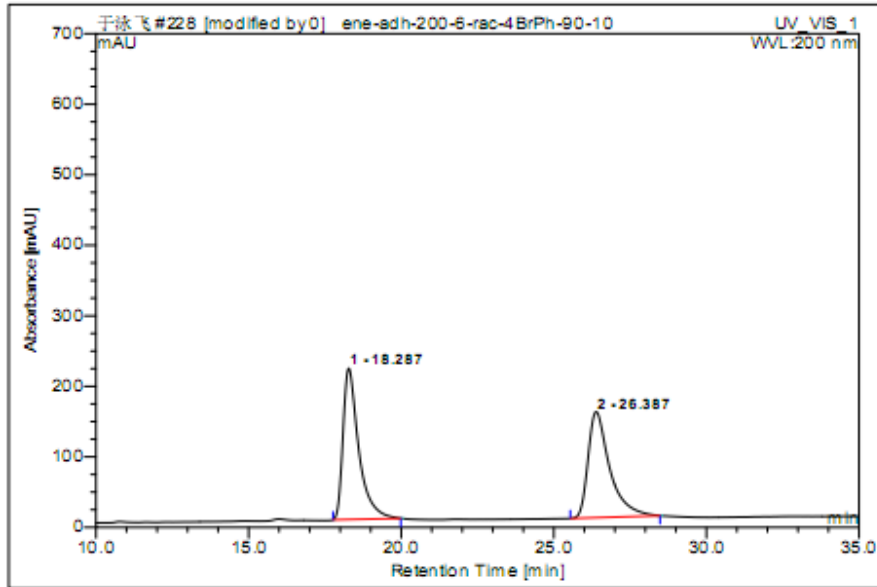

| No.           | Ret.Time<br>min | Peak Name | Height<br>mAU | Area<br>mAU*min | Rel.Area<br>% | Amount | Type |
|---------------|-----------------|-----------|---------------|-----------------|---------------|--------|------|
| 1             | 18.29           | n.a.      | 214.249       | 127.963         | 50.86         | n.a.   | BMB* |
| 2             | 26.39           | n.a.      | 150.185       | 123.654         | 49.14         | n.a.   | BMB* |
| <b>Total:</b> |                 |           | 364.435       | 251.617         | 100.00        | 0.000  |      |

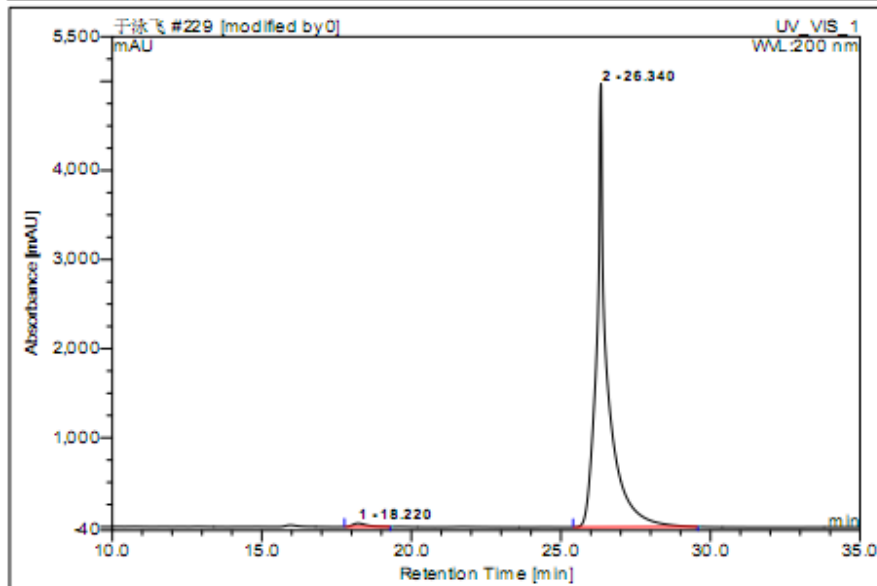

| No.           | Ret.Time<br>min | Peak Name | Height<br>mAU | Area<br>mAU*min | Rel.Area<br>% | Amount | Type |
|---------------|-----------------|-----------|---------------|-----------------|---------------|--------|------|
| 1             | 18.22           | n.a.      | 39.271        | 21.080          | 1.02          | n.a.   | BMB* |
| 2             | 26.34           | n.a.      | 4975.066      | 2048.116        | 98.98         | n.a.   | BMB* |
| <b>Total:</b> |                 |           | 5014.337      | 2069.196        | 100.00        | 0.000  |      |

Compound 2l

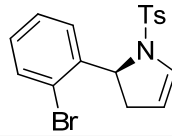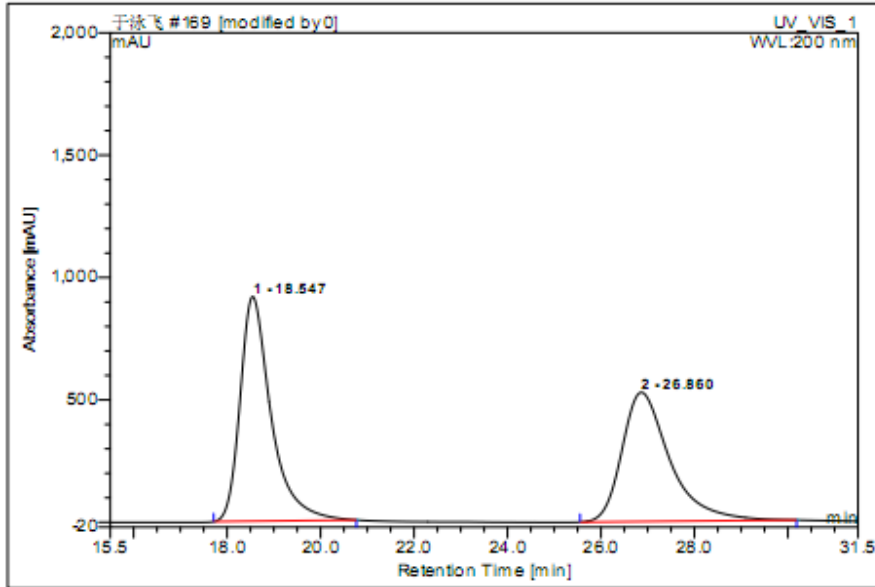

| No.           | Ret.Time<br>min | Peak Name | Height<br>mAU | Area<br>mAU*min | Rel.Area<br>% | Amount | Type |
|---------------|-----------------|-----------|---------------|-----------------|---------------|--------|------|
| 1             | 18.55           | n.a.      | 917.616       | 705.955         | 52.96         | n.a.   | BMB* |
| 2             | 26.86           | n.a.      | 527.586       | 627.107         | 47.04         | n.a.   | BMB* |
| <b>Total:</b> |                 |           | 1445.203      | 1333.062        | 100.00        | 0.000  |      |

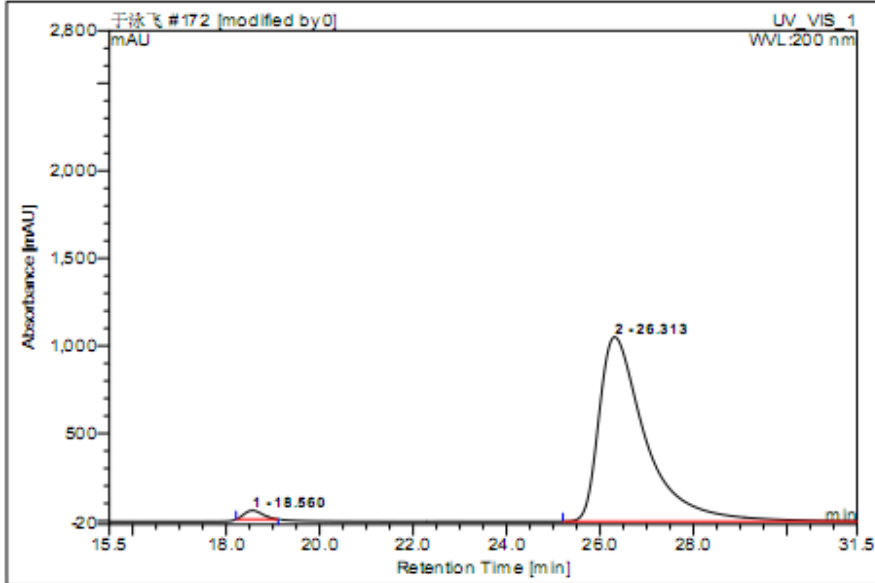

| No.           | Ret.Time<br>min | Peak Name | Height<br>mAU | Area<br>mAU*min | Rel.Area<br>% | Amount | Type |
|---------------|-----------------|-----------|---------------|-----------------|---------------|--------|------|
| 1             | 18.56           | n.a.      | 50.823        | 23.034          | 1.85          | n.a.   | BMB* |
| 2             | 26.31           | n.a.      | 1053.556      | 1218.926        | 98.15         | n.a.   | BMB  |
| <b>Total:</b> |                 |           | 1104.380      | 1241.960        | 100.00        | 0.000  |      |

Compound **2m**

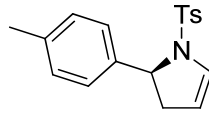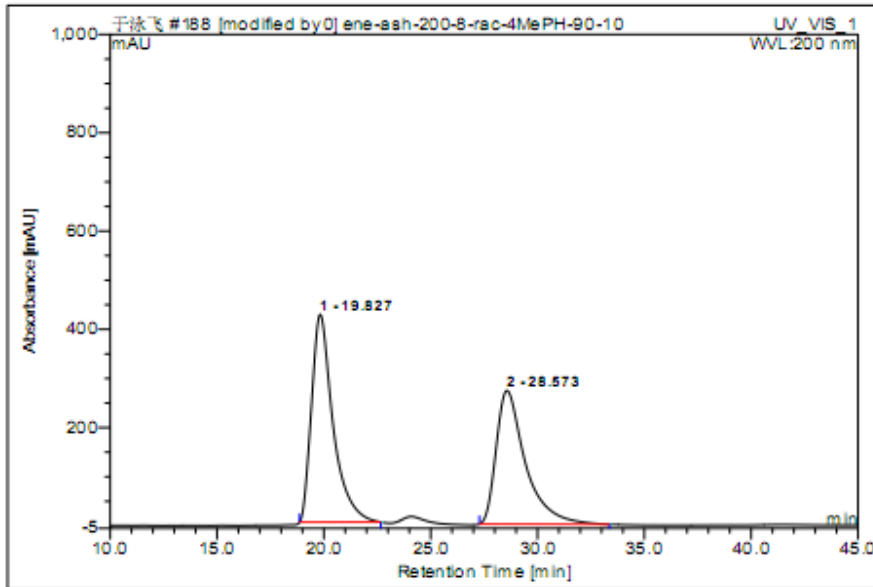

| No.           | Ret.Time min | Peak Name | Height mAU     | Area mAU*min   | Rel.Area %    | Amount       | Type |
|---------------|--------------|-----------|----------------|----------------|---------------|--------------|------|
| 1             | 19.83        | n.a.      | 422.584        | 491.713        | 53.25         | n.a.         | BMB* |
| 2             | 28.57        | n.a.      | 271.884        | 431.623        | 46.75         | n.a.         | BMB* |
| <b>Total:</b> |              |           | <b>694.468</b> | <b>923.335</b> | <b>100.00</b> | <b>0.000</b> |      |

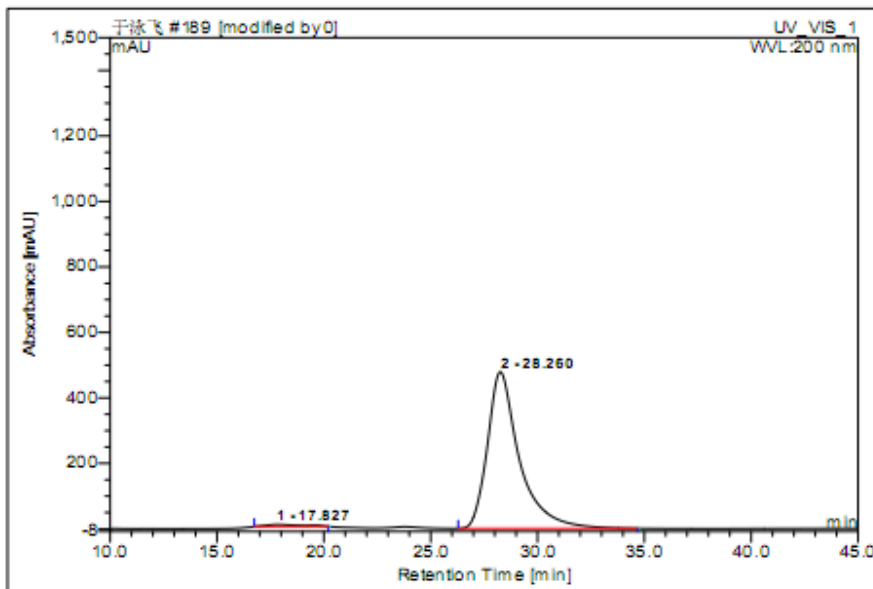

| No.           | Ret.Time min | Peak Name | Height mAU     | Area mAU*min   | Rel.Area %    | Amount       | Type |
|---------------|--------------|-----------|----------------|----------------|---------------|--------------|------|
| 1             | 17.83        | n.a.      | 6.378          | 13.150         | 1.56          | n.a.         | BMB* |
| 2             | 28.26        | n.a.      | 478.184        | 828.632        | 98.44         | n.a.         | BMB  |
| <b>Total:</b> |              |           | <b>484.562</b> | <b>841.782</b> | <b>100.00</b> | <b>0.000</b> |      |

Compound **2n**

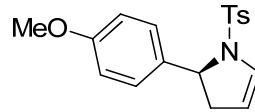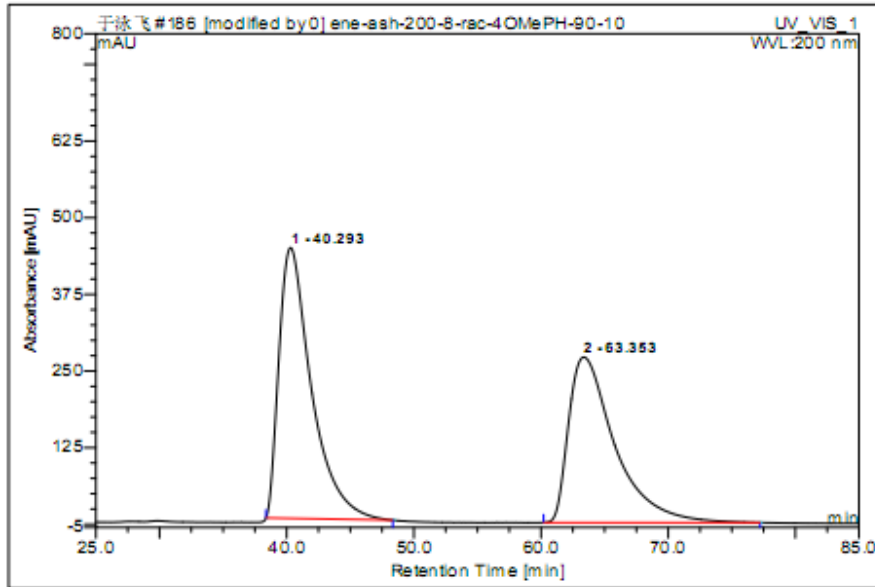

| No.           | Ret.Time min | Peak Name | Height mAU | Area mAU*min | Rel.Area % | Amount | Type |
|---------------|--------------|-----------|------------|--------------|------------|--------|------|
| 1             | 40.29        | n.a.      | 441.211    | 1305.697     | 53.44      | n.a.   | BMB* |
| 2             | 63.35        | n.a.      | 269.841    | 1137.558     | 46.56      | n.a.   | BMB* |
| <b>Total:</b> |              |           | 711.052    | 2443.255     | 100.00     | 0.000  |      |

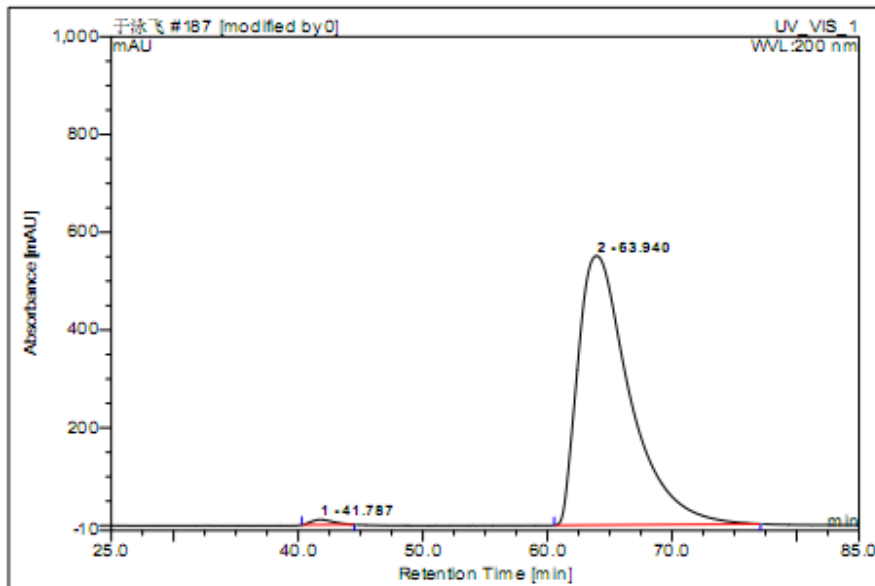

| No.           | Ret.Time min | Peak Name | Height mAU | Area mAU*min | Rel.Area % | Amount | Type |
|---------------|--------------|-----------|------------|--------------|------------|--------|------|
| 1             | 41.79        | n.a.      | 10.547     | 21.779       | 0.81       | n.a.   | BMB* |
| 2             | 63.94        | n.a.      | 551.028    | 2653.289     | 99.19      | n.a.   | BMB  |
| <b>Total:</b> |              |           | 561.574    | 2675.068     | 100.00     | 0.000  |      |

Compound 2o

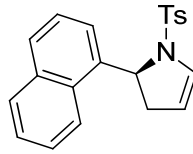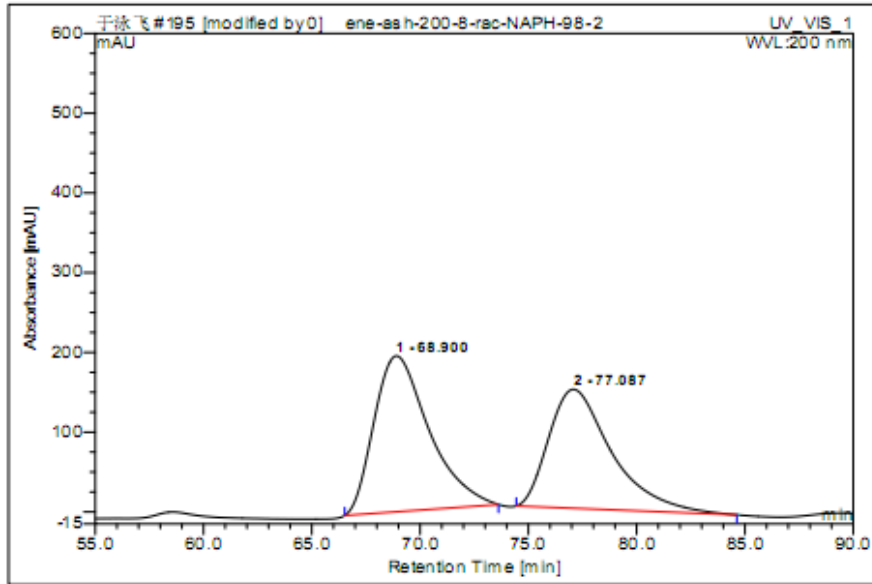

| No.           | Ret.Time<br>min | Peak Name | Height<br>mAU | Area<br>mAU*min | Rel.Area<br>% | Amount | Type |
|---------------|-----------------|-----------|---------------|-----------------|---------------|--------|------|
| 1             | 68.90           | n.a.      | 195.463       | 575.424         | 53.44         | n.a.   | BMB* |
| 2             | 77.09           | n.a.      | 149.164       | 501.365         | 46.56         | n.a.   | BMB* |
| <b>Total:</b> |                 |           | 344.626       | 1076.789        | 100.00        | 0.000  |      |

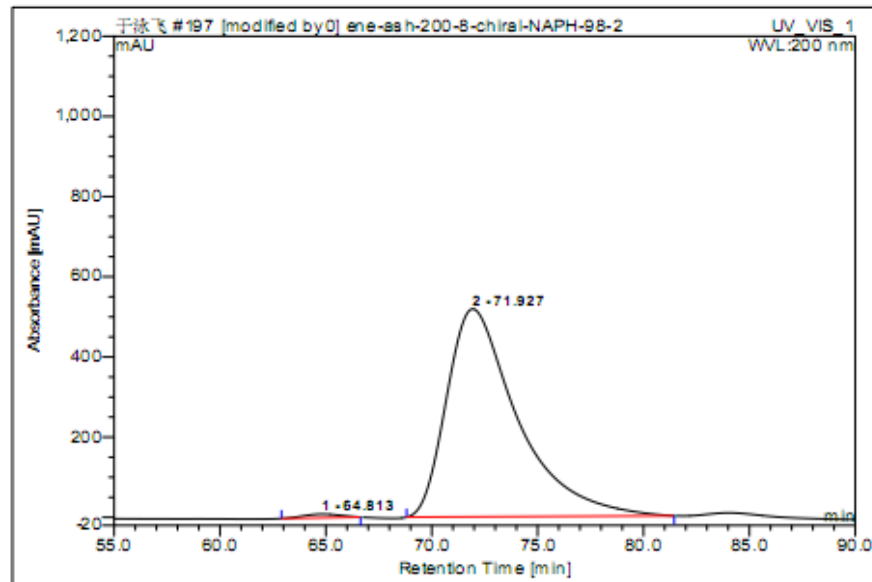

| No.           | Ret.Time<br>min | Peak Name | Height<br>mAU | Area<br>mAU*min | Rel.Area<br>% | Amount | Type |
|---------------|-----------------|-----------|---------------|-----------------|---------------|--------|------|
| 1             | 64.81           | n.a.      | 9.282         | 18.569          | 0.92          | n.a.   | BMB* |
| 2             | 71.93           | n.a.      | 518.430       | 2009.789        | 99.08         | n.a.   | BMB* |
| <b>Total:</b> |                 |           | 527.712       | 2028.358        | 100.00        | 0.000  |      |

Compound **2a'**

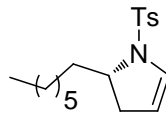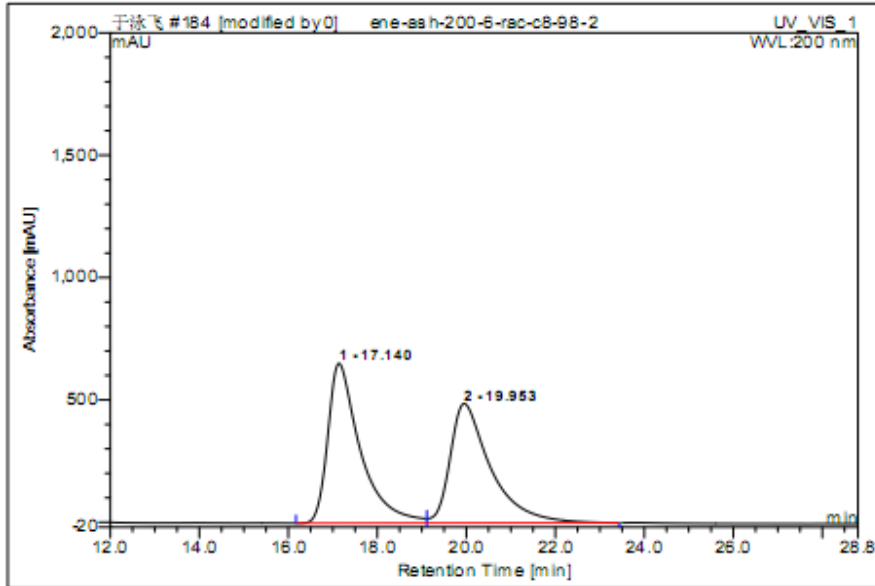

| No.           | Ret.Time min | Peak Name | Height mAU | Area mAU*min | Rel.Area % | Amount | Type |
|---------------|--------------|-----------|------------|--------------|------------|--------|------|
| 1             | 17.14        | n.a.      | 653.050    | 552.804      | 51.76      | n.a.   | BM*  |
| 2             | 19.95        | n.a.      | 488.036    | 515.241      | 48.24      | n.a.   | MB*  |
| <b>Total:</b> |              |           | 1141.086   | 1068.044     | 100.00     | 0.000  |      |

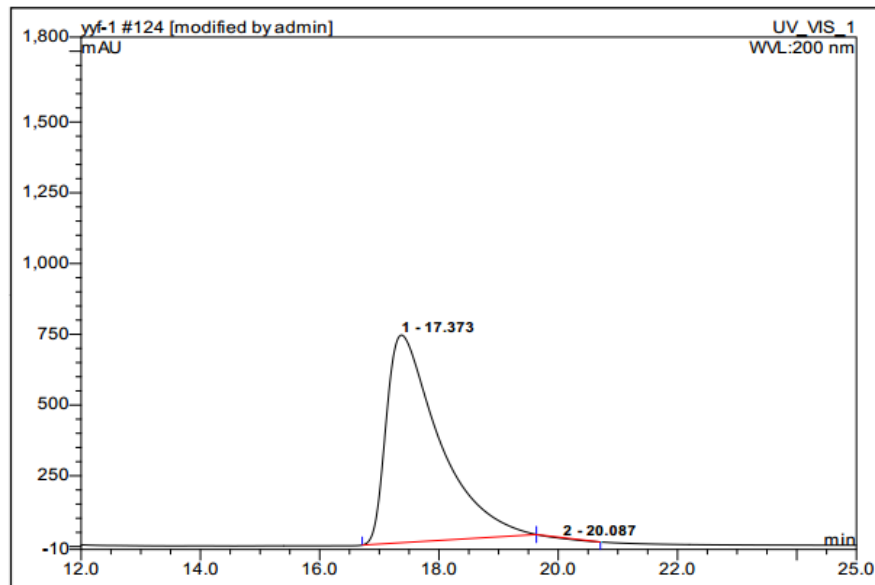

| No.           | Ret.Time min | Peak Name | Height mAU | Area mAU*min | Rel.Area % | Amount | Type |
|---------------|--------------|-----------|------------|--------------|------------|--------|------|
| 1             | 17.37        | n.a.      | 733.329    | 753.760      | 99.69      | n.a.   | BMB* |
| 2             | 20.09        | n.a.      | 3.151      | 2.372        | 0.31       | n.a.   | bMB* |
| <b>Total:</b> |              |           | 736.480    | 756.132      | 100.00     | 0.000  |      |

Compound **2p**

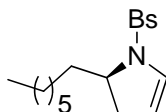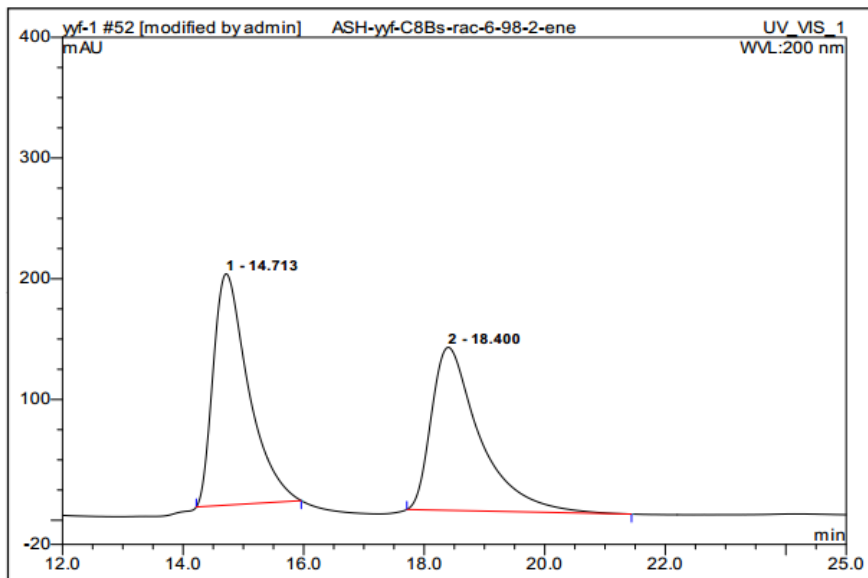

| No.           | Ret.Time<br>min | Peak Name | Height<br>mAU | Area<br>mAU*min | Rel.Area<br>% | Amount | Type |
|---------------|-----------------|-----------|---------------|-----------------|---------------|--------|------|
| 1             | 14.71           | n.a.      | 191.598       | 130.000         | 50.88         | n.a.   | BMB* |
| 2             | 18.40           | n.a.      | 135.008       | 125.511         | 49.12         | n.a.   | BMB* |
| <b>Total:</b> |                 |           | 326.606       | 255.511         | 100.00        | 0.000  |      |

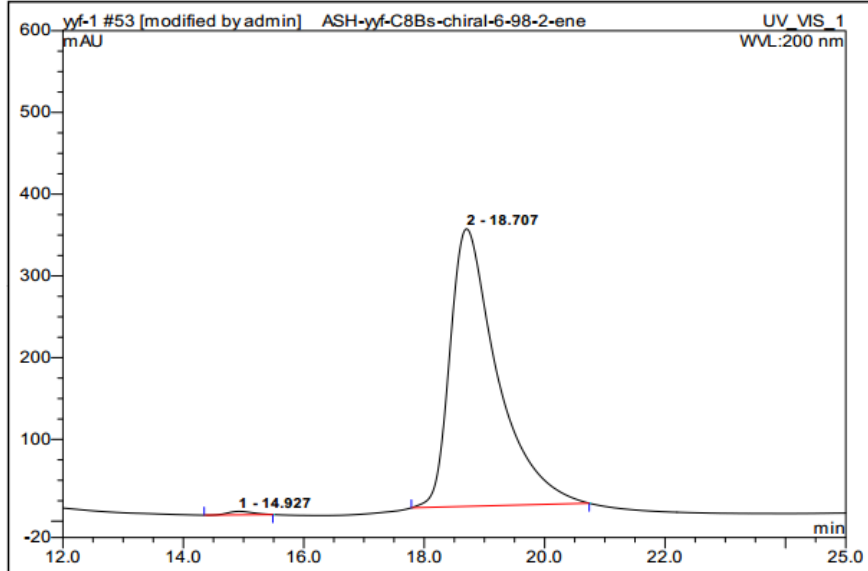

| No.           | Ret.Time<br>min | Peak Name | Height<br>mAU | Area<br>mAU*min | Rel.Area<br>% | Amount | Type |
|---------------|-----------------|-----------|---------------|-----------------|---------------|--------|------|
| 1             | 14.93           | n.a.      | 4.269         | 2.062           | 0.66          | n.a.   | BMB* |
| 2             | 18.71           | n.a.      | 339.440       | 308.784         | 99.34         | n.a.   | BMB* |
| <b>Total:</b> |                 |           | 343.709       | 310.846         | 100.00        | 0.000  |      |

Compound 2q

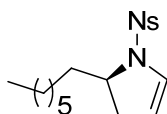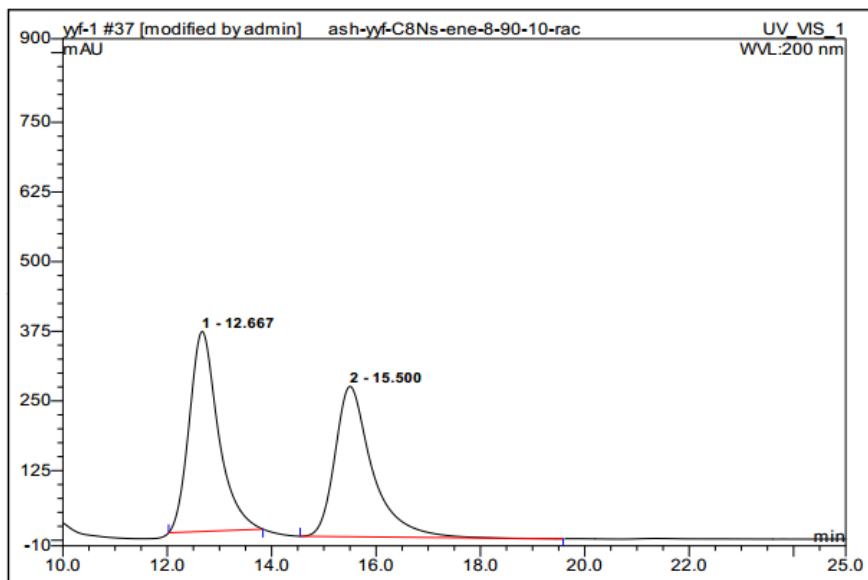

| No.           | Ret.Time min | Peak Name | Height mAU | Area mAU*min | Rel.Area % | Amount | Type |
|---------------|--------------|-----------|------------|--------------|------------|--------|------|
| 1             | 12.67        | n.a.      | 358.751    | 231.928      | 51.03      | n.a.   | BMB* |
| 2             | 15.50        | n.a.      | 269.756    | 222.578      | 48.97      | n.a.   | BMB* |
| <b>Total:</b> |              |           | 628.507    | 454.506      | 100.00     | 0.000  |      |

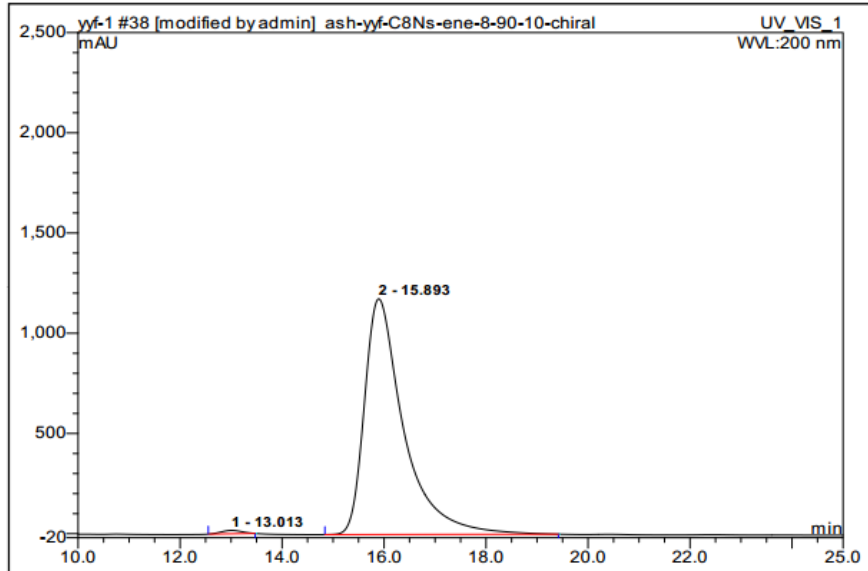

| No.           | Ret.Time min | Peak Name | Height mAU | Area mAU*min | Rel.Area % | Amount | Type |
|---------------|--------------|-----------|------------|--------------|------------|--------|------|
| 1             | 13.01        | n.a.      | 16.993     | 8.019        | 0.76       | n.a.   | BMB* |
| 2             | 15.89        | n.a.      | 1175.672   | 1049.785     | 99.24      | n.a.   | BMB* |
| <b>Total:</b> |              |           | 1192.666   | 1057.803     | 100.00     | 0.000  |      |



Compound **2r**

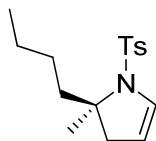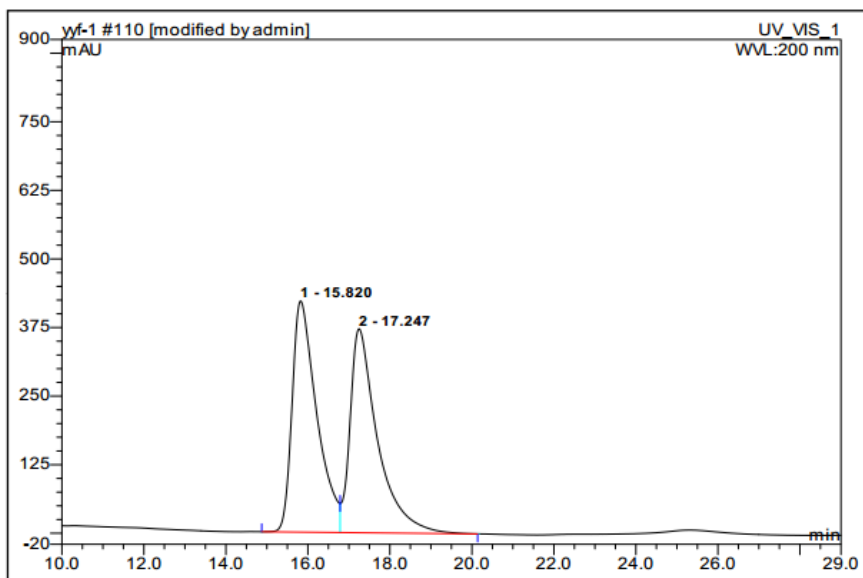

| No.           | Ret.Time<br>min | Peak Name | Height<br>mAU | Area<br>mAU*min | Rel.Area<br>% | Amount | Type |
|---------------|-----------------|-----------|---------------|-----------------|---------------|--------|------|
| 1             | 15.82           | n.a.      | 421.202       | 293.525         | 50.38         | n.a.   | BM   |
| 2             | 17.25           | n.a.      | 371.530       | 289.100         | 49.62         | n.a.   | MB   |
| <b>Total:</b> |                 |           | 792.732       | 582.624         | 100.00        | 0.000  |      |

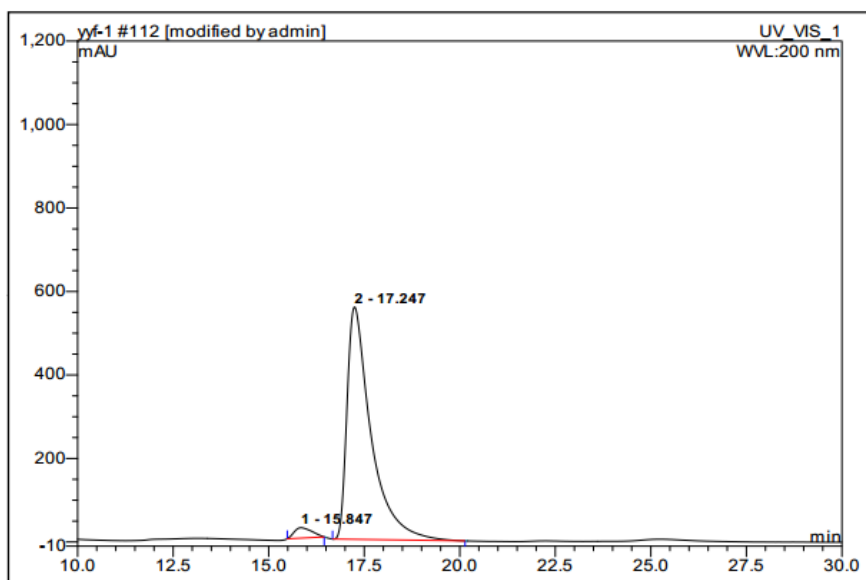

| No.           | Ret.Time<br>min | Peak Name | Height<br>mAU | Area<br>mAU*min | Rel.Area<br>% | Amount | Type |
|---------------|-----------------|-----------|---------------|-----------------|---------------|--------|------|
| 1             | 15.85           | n.a.      | 24.920        | 13.292          | 3.18          | n.a.   | BMB* |
| 2             | 17.25           | n.a.      | 556.483       | 405.074         | 96.82         | n.a.   | BMB* |
| <b>Total:</b> |                 |           | 581.403       | 418.366         | 100.00        | 0.000  |      |

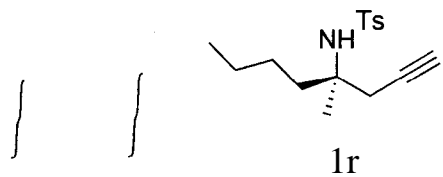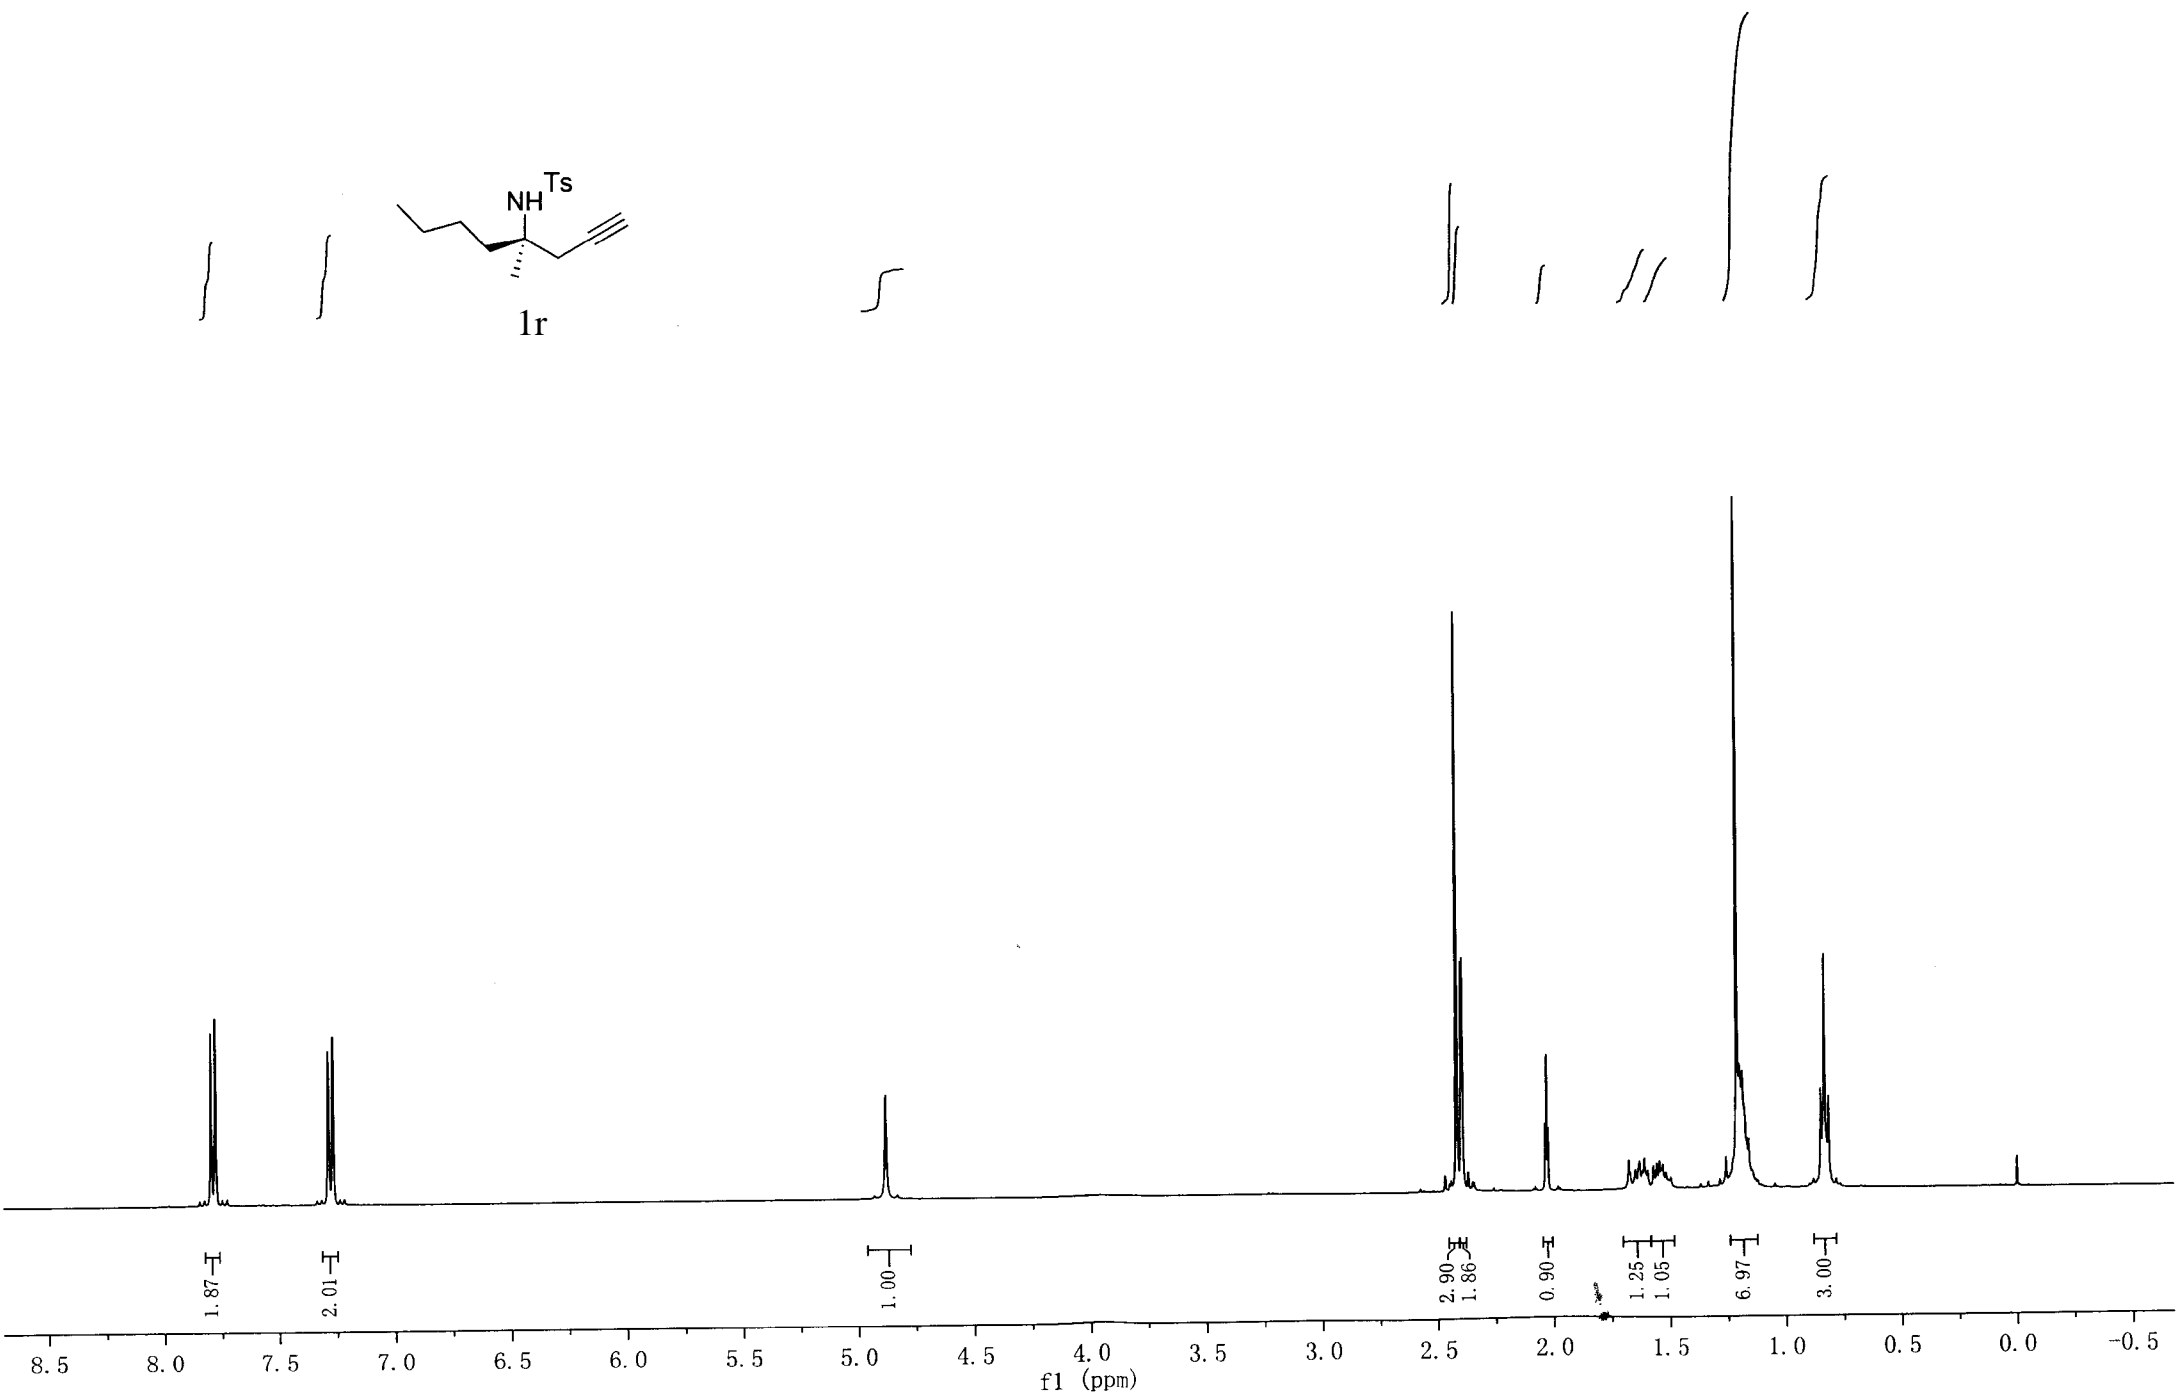

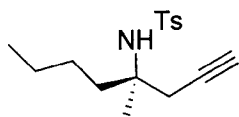

1r

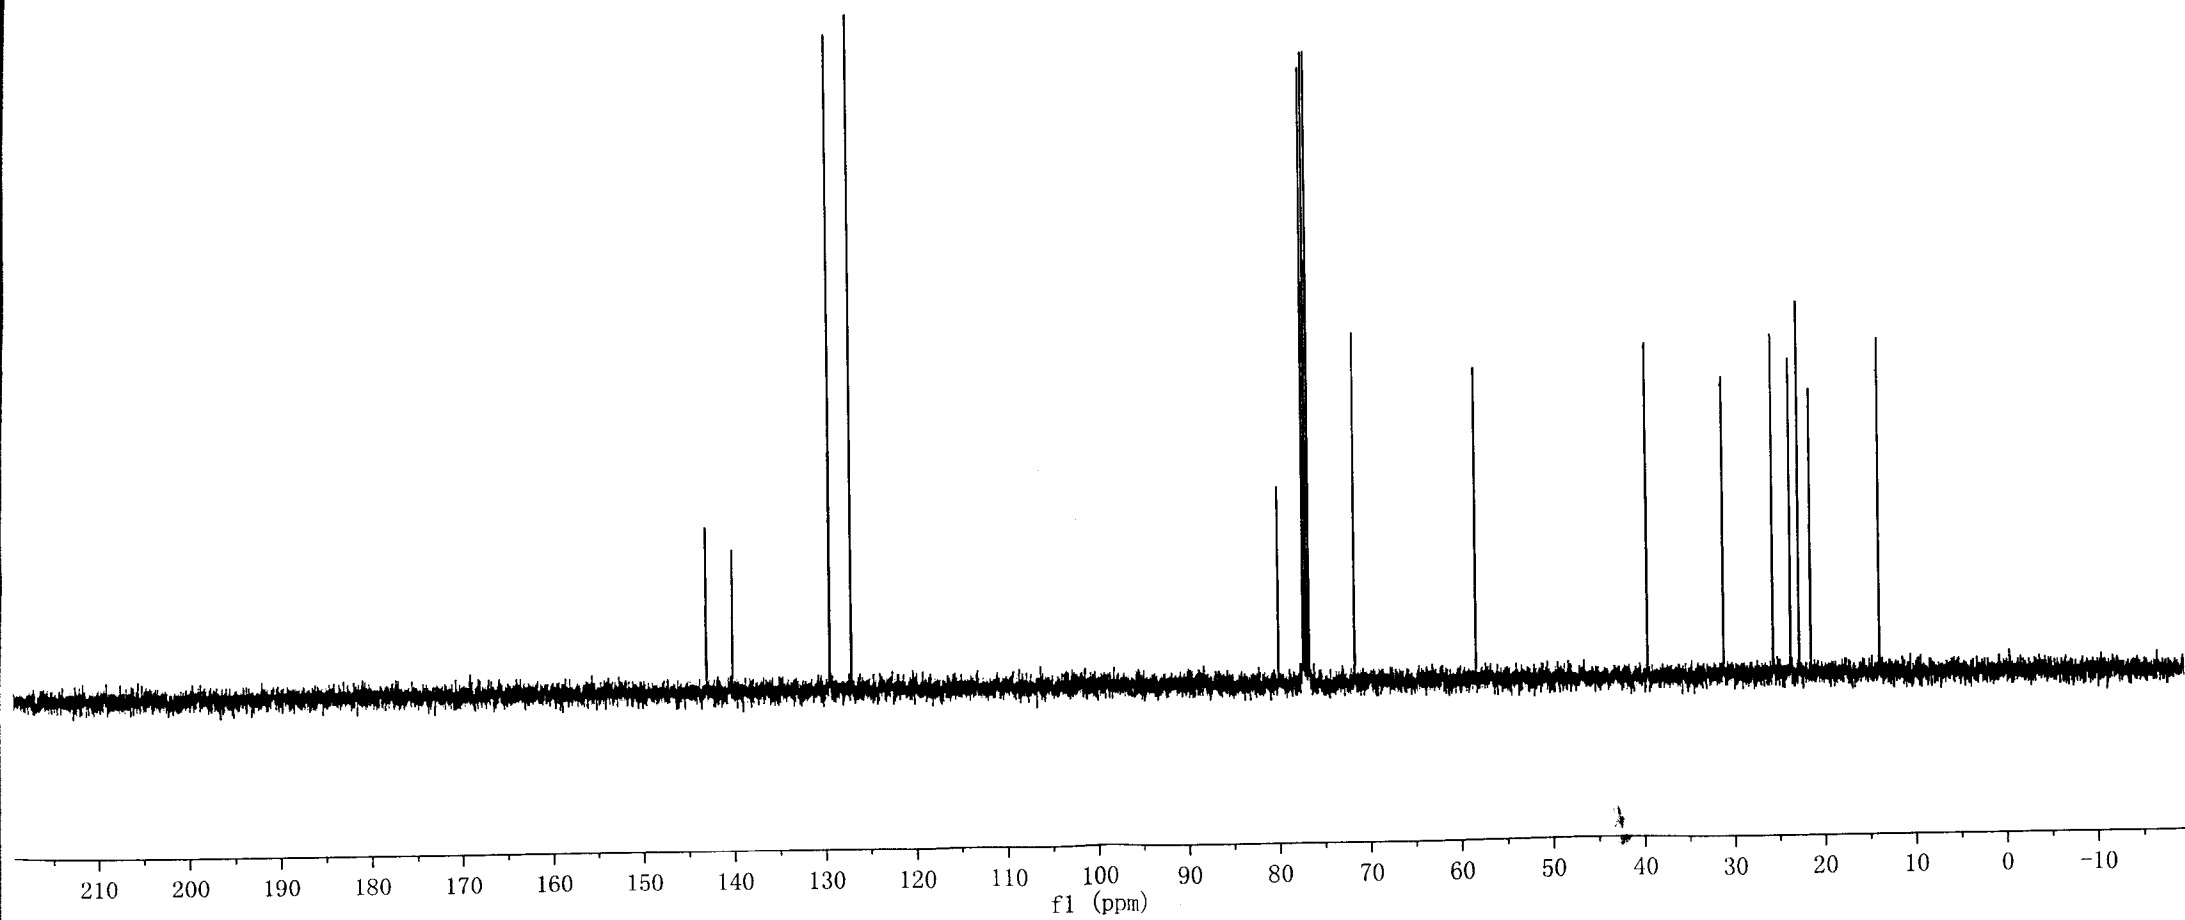

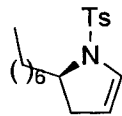

2a

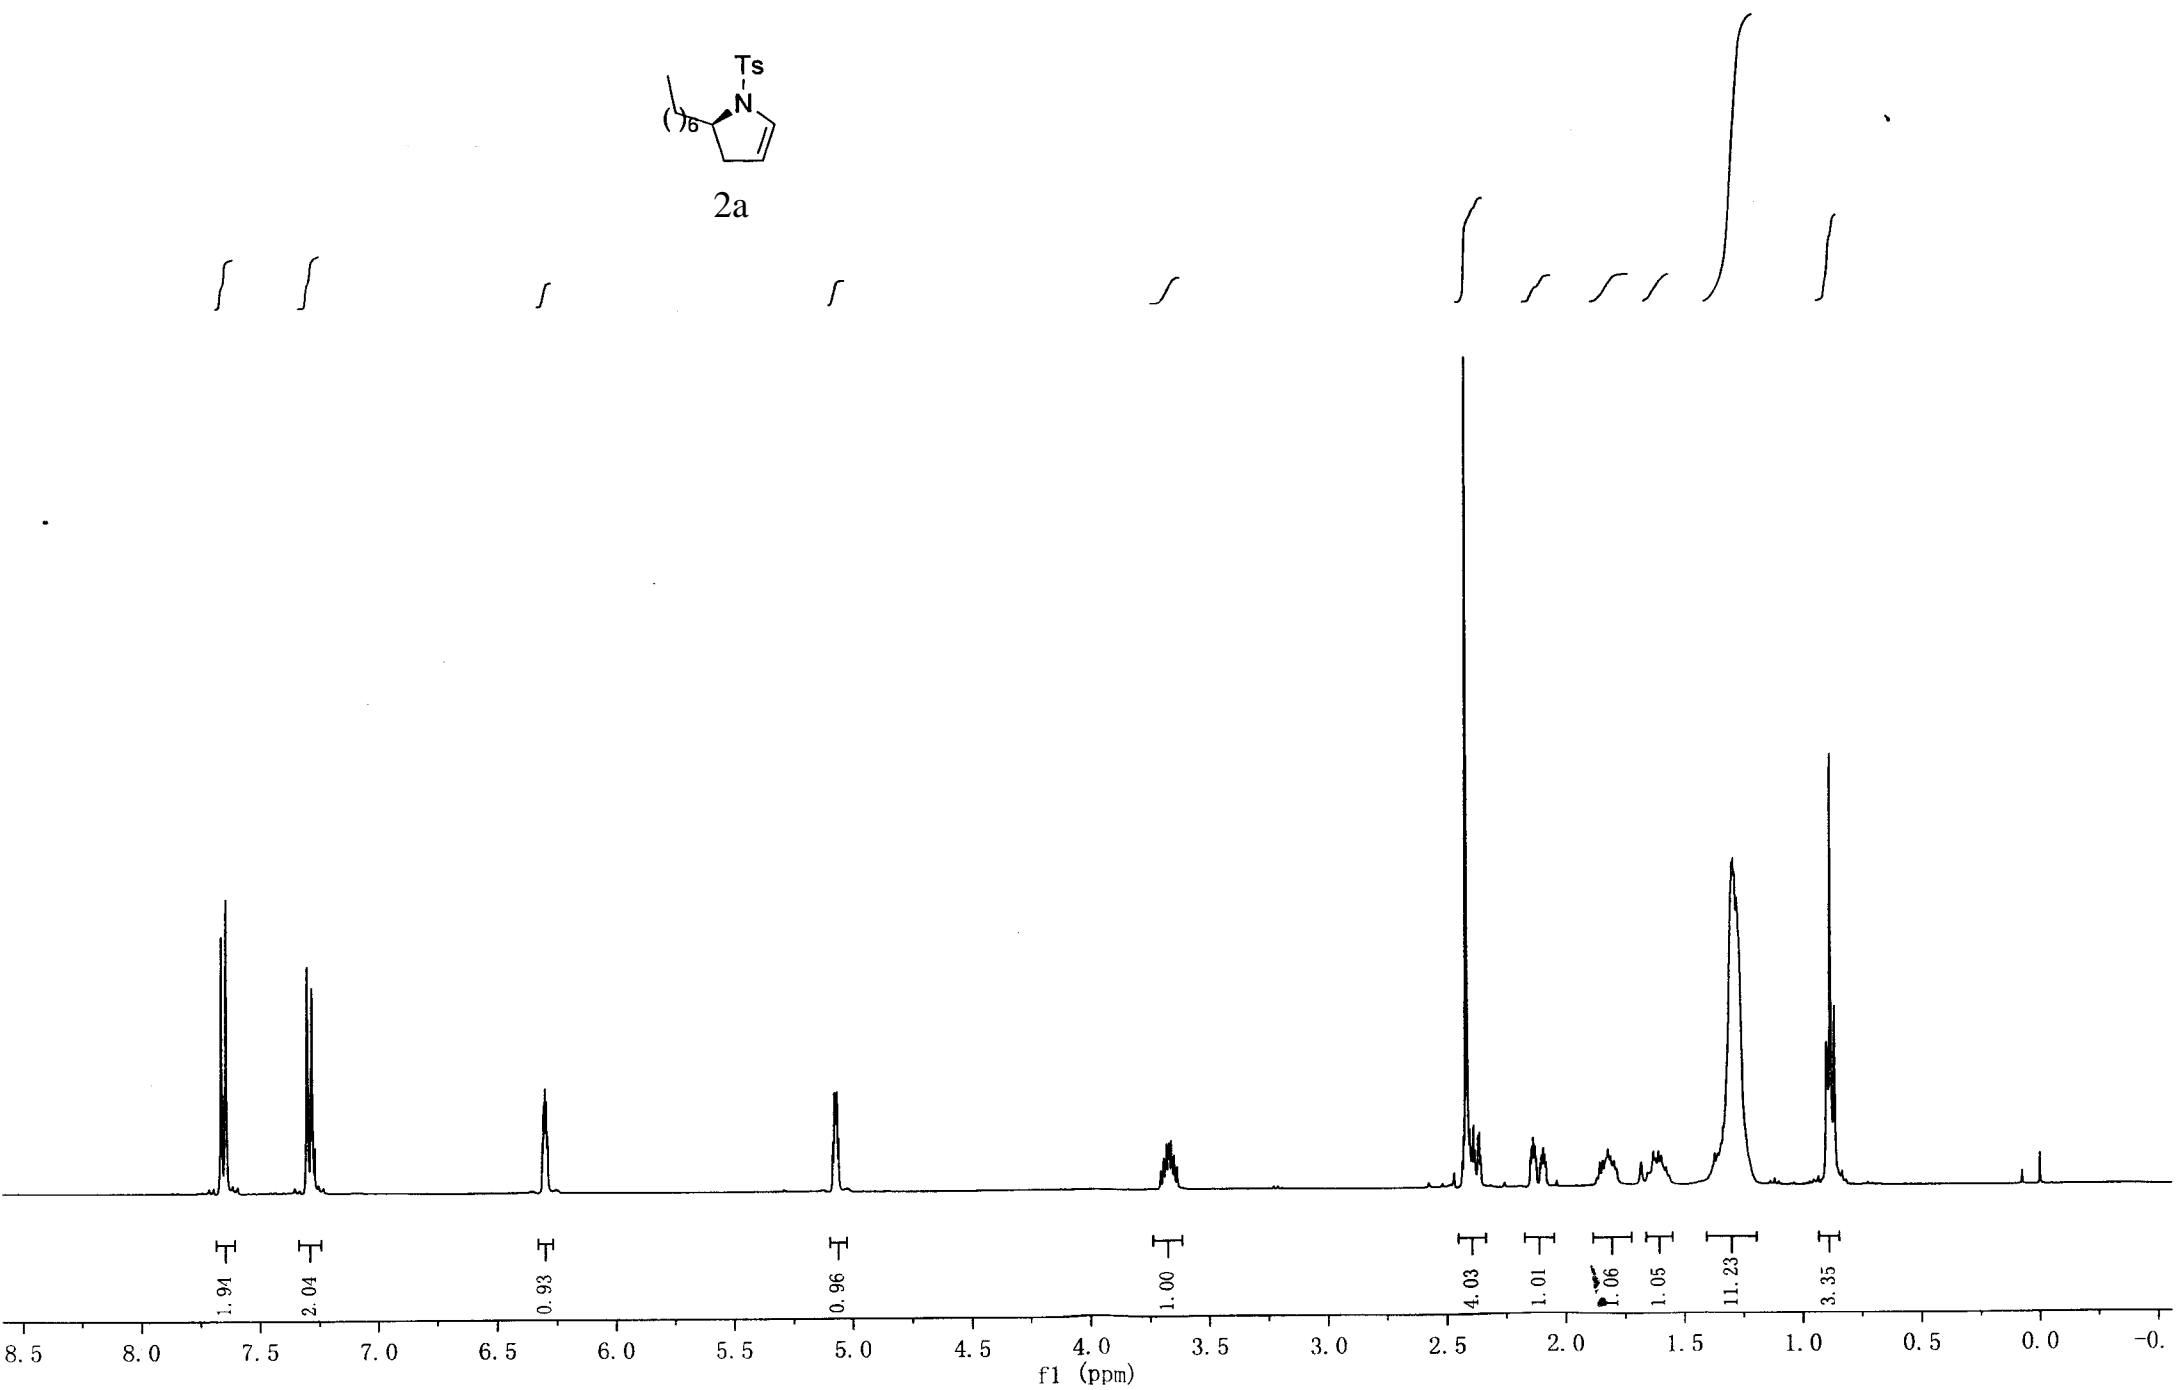

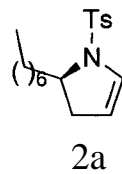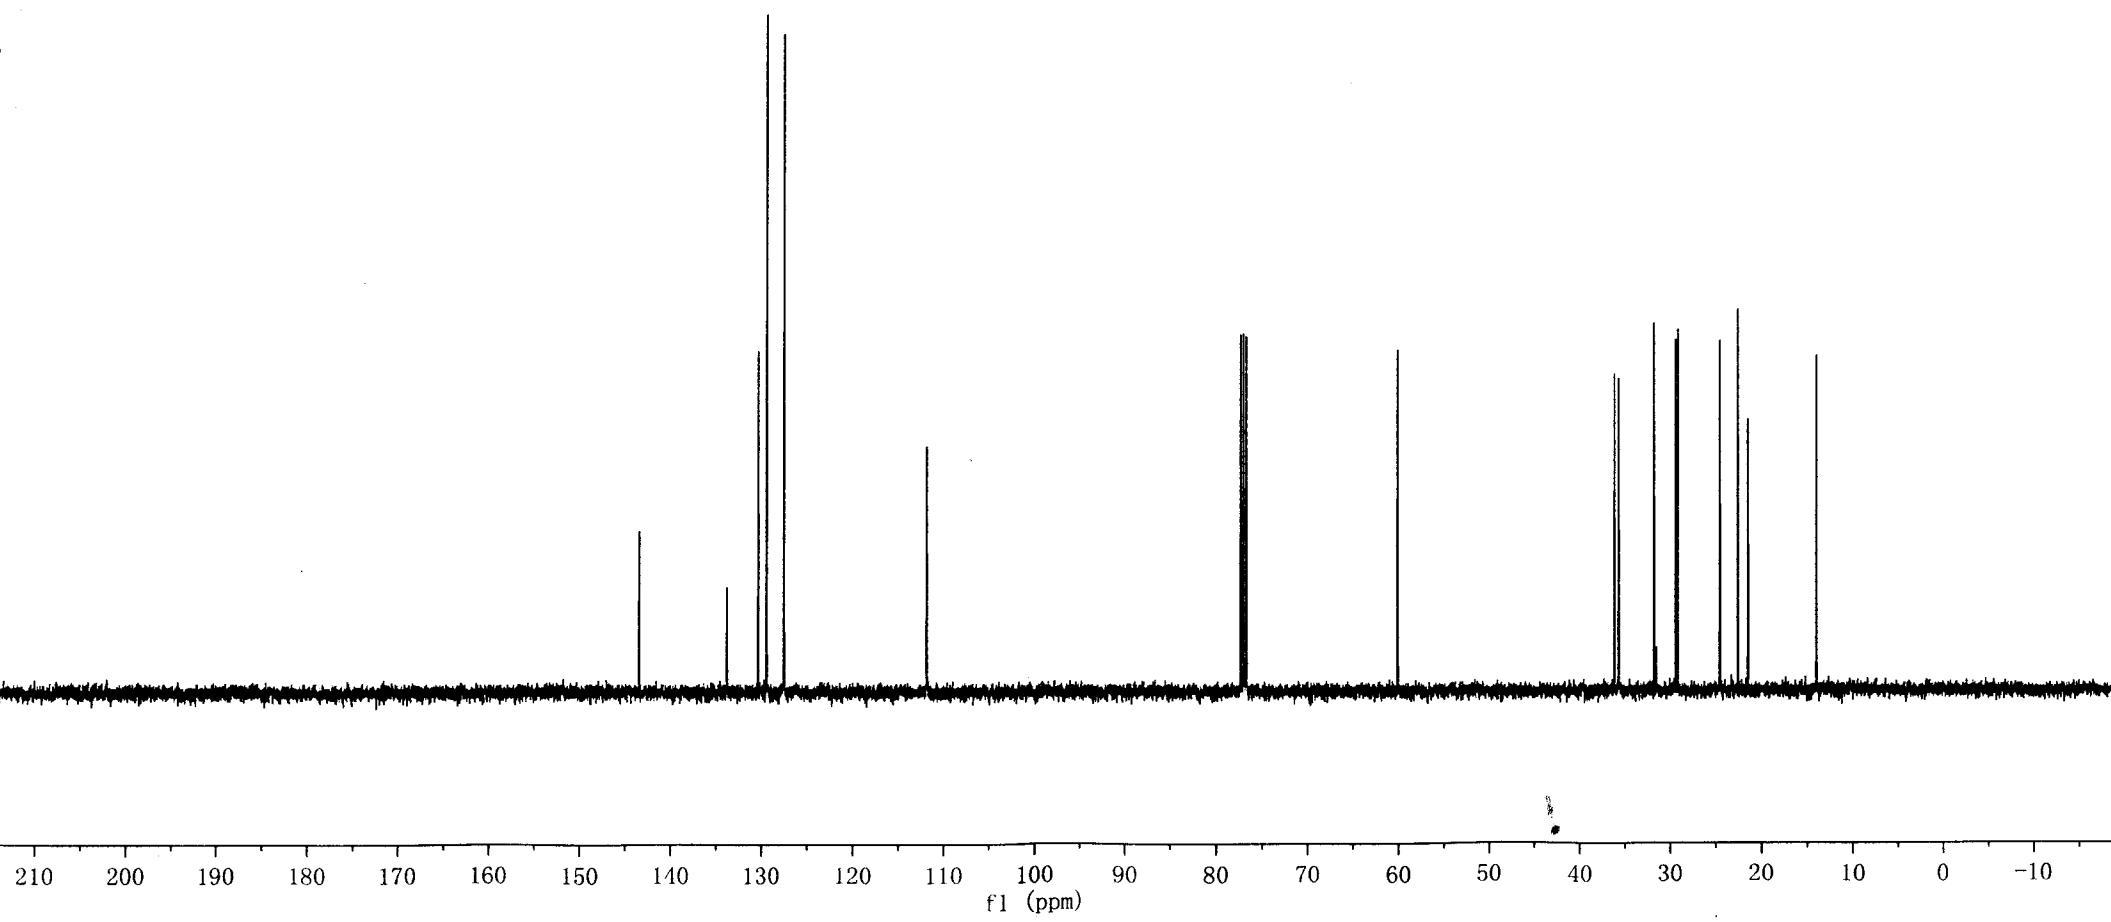

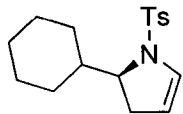

2b

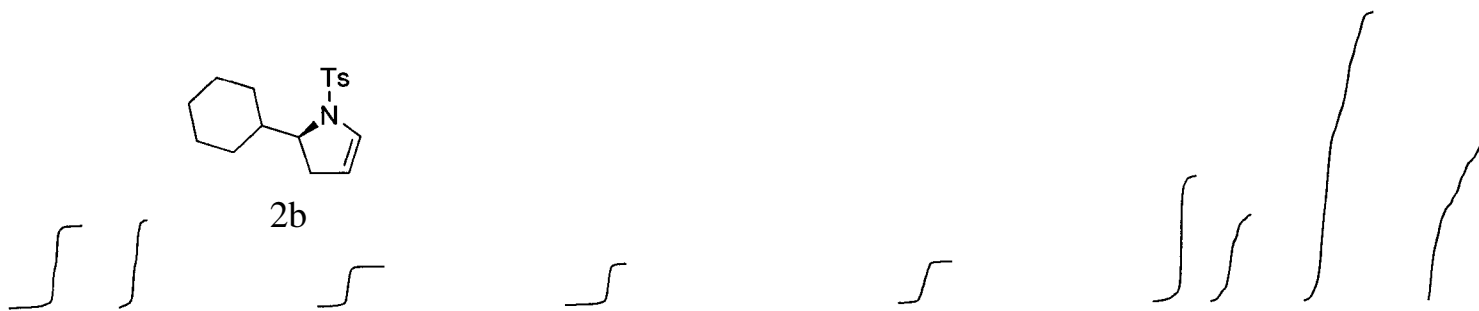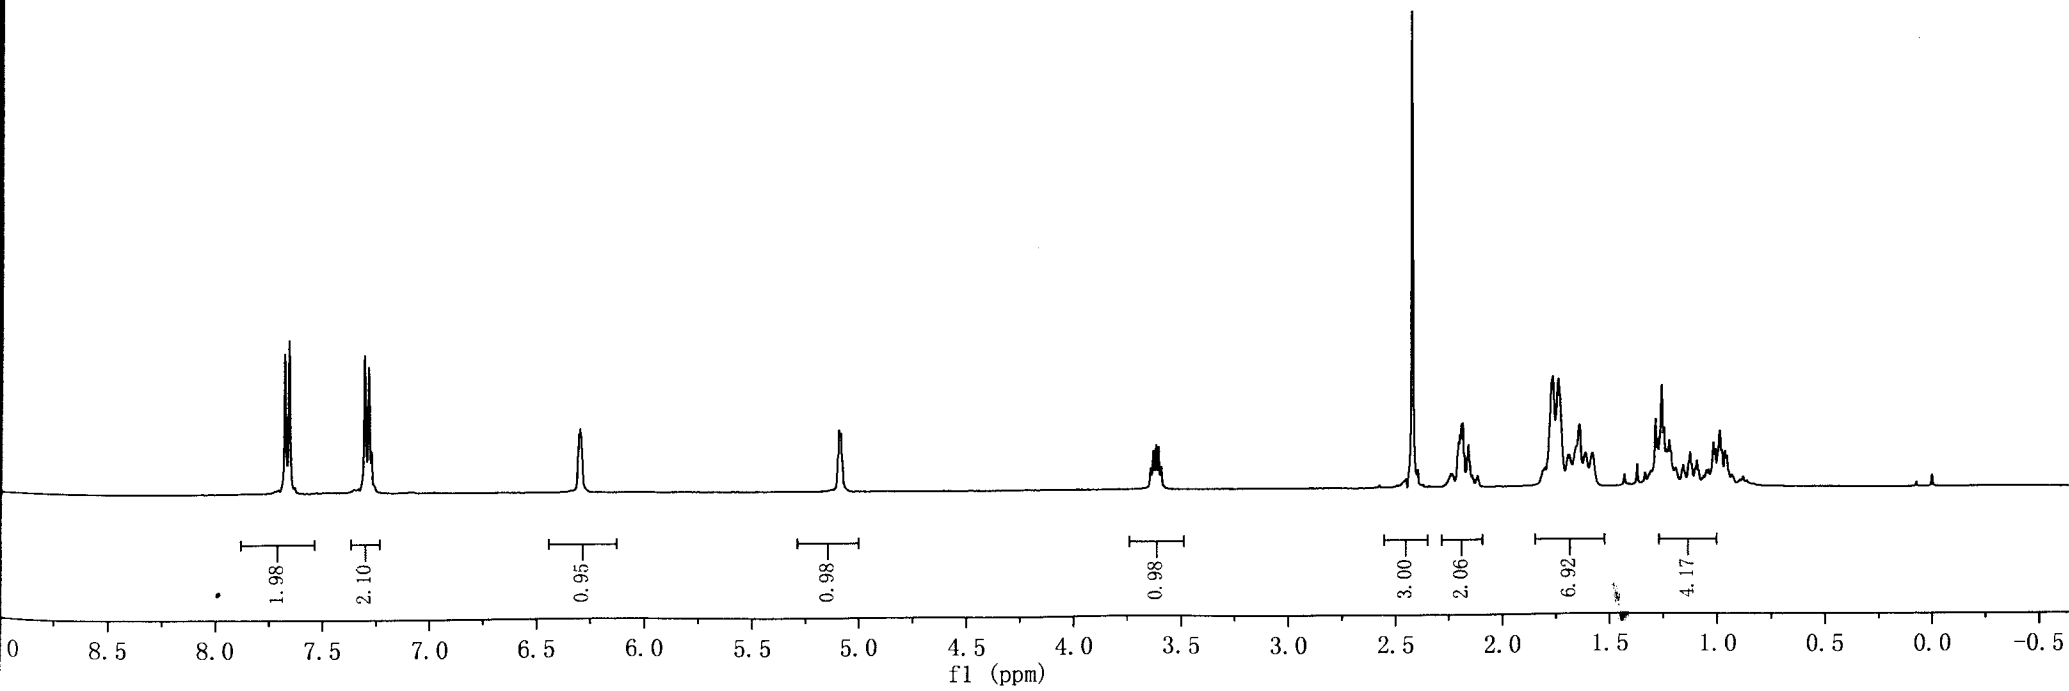

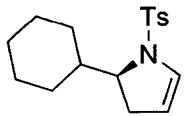

2b

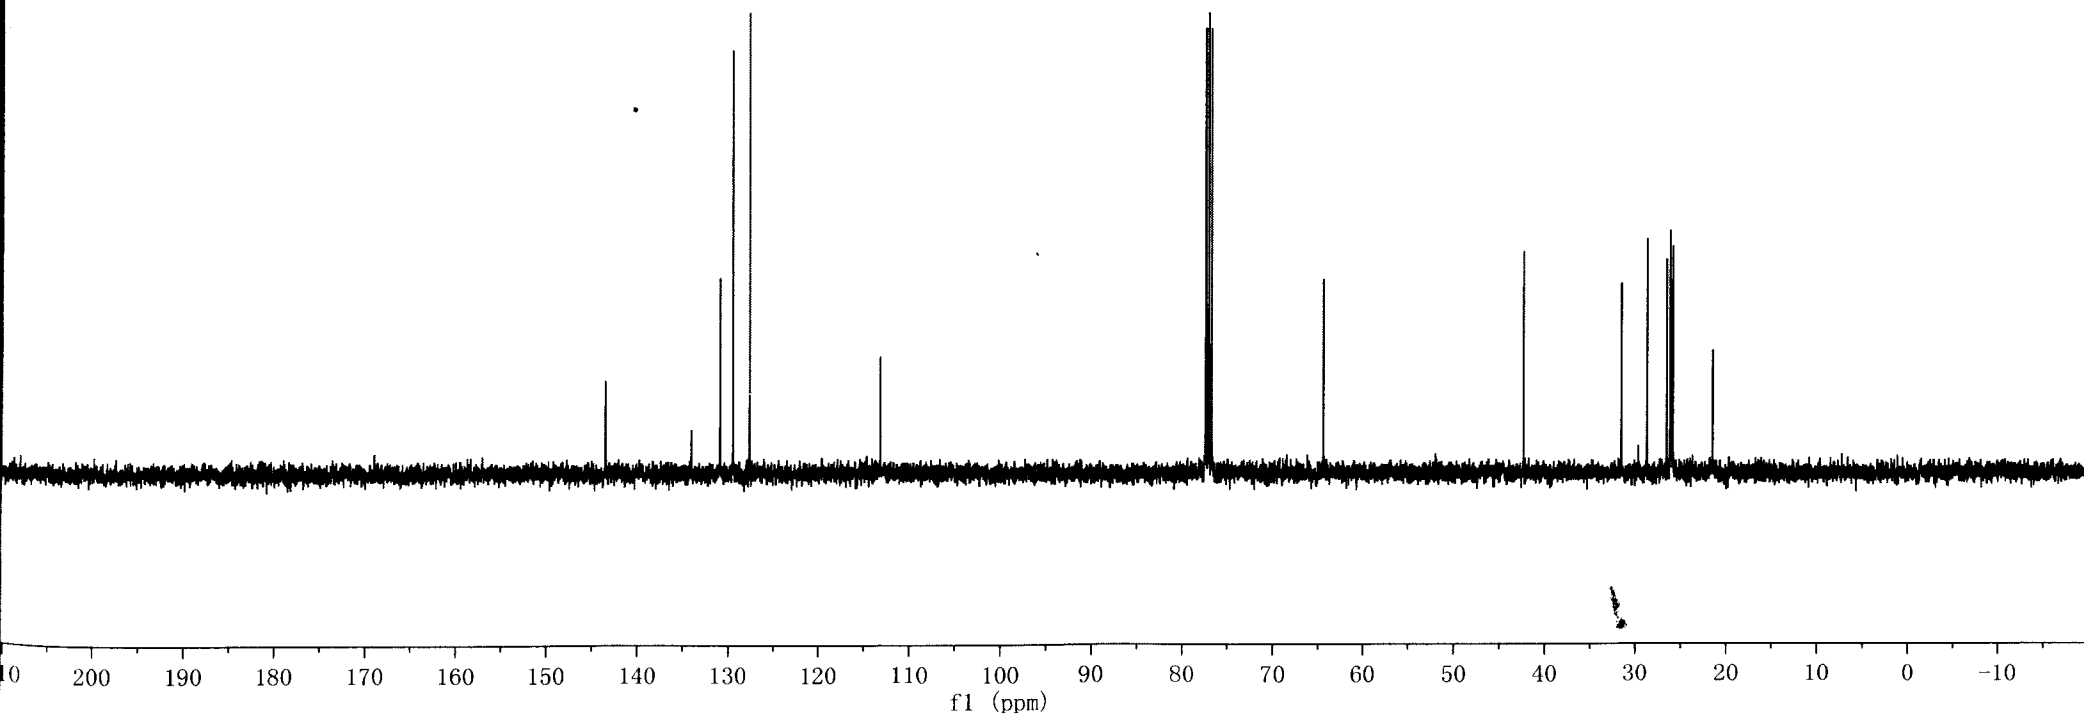

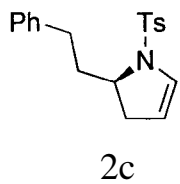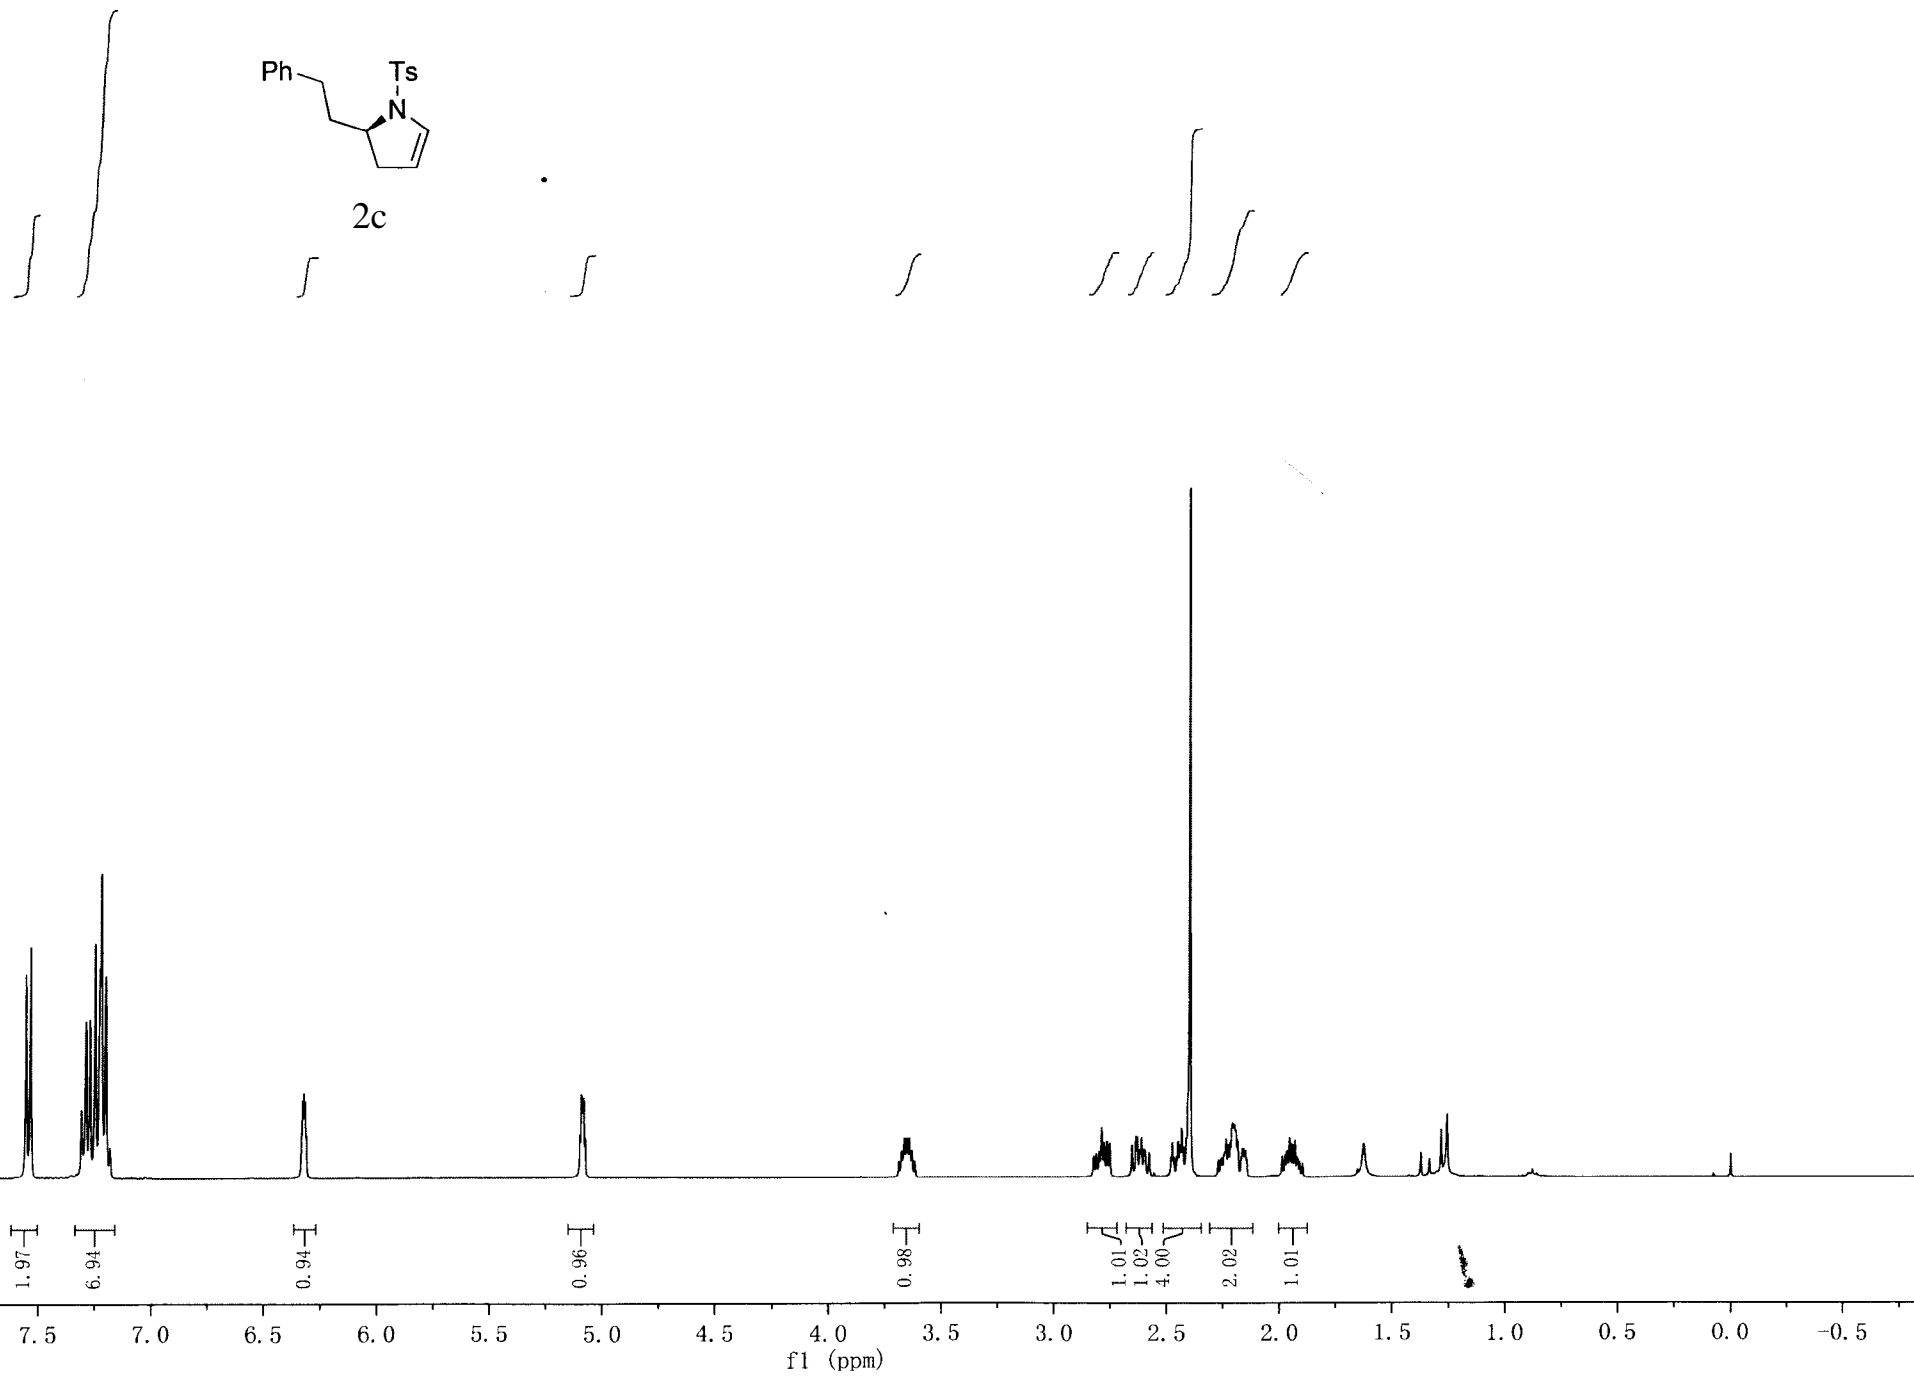



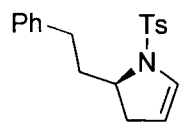

2c

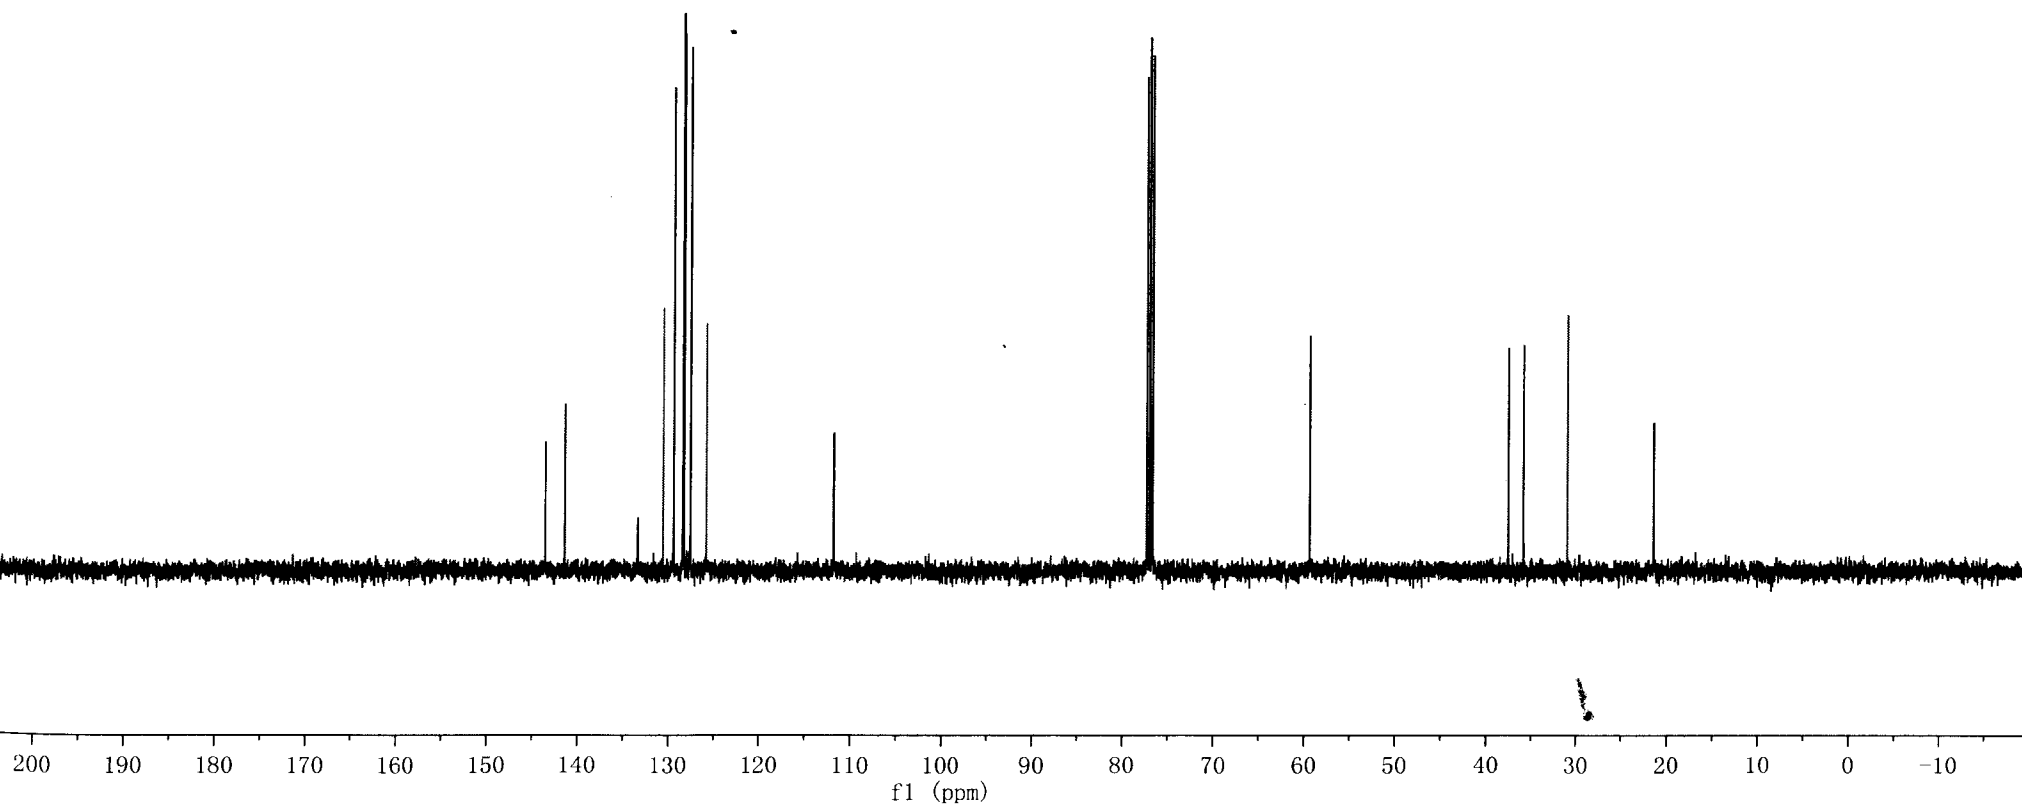

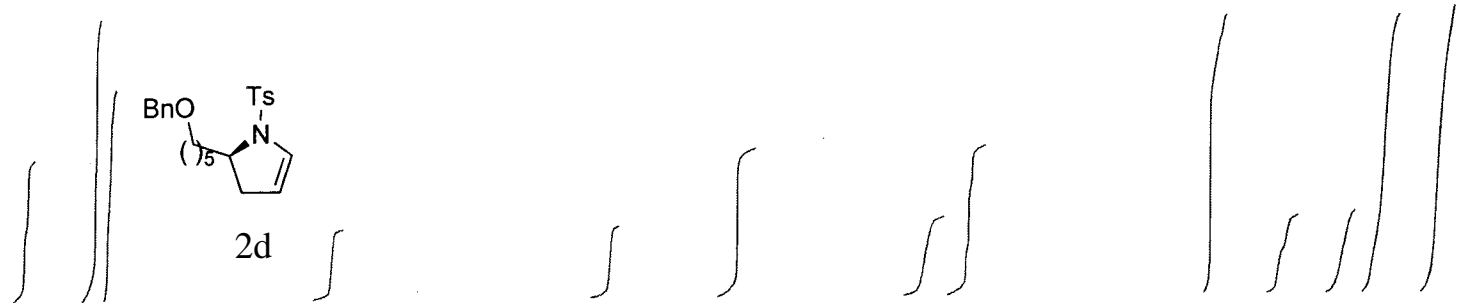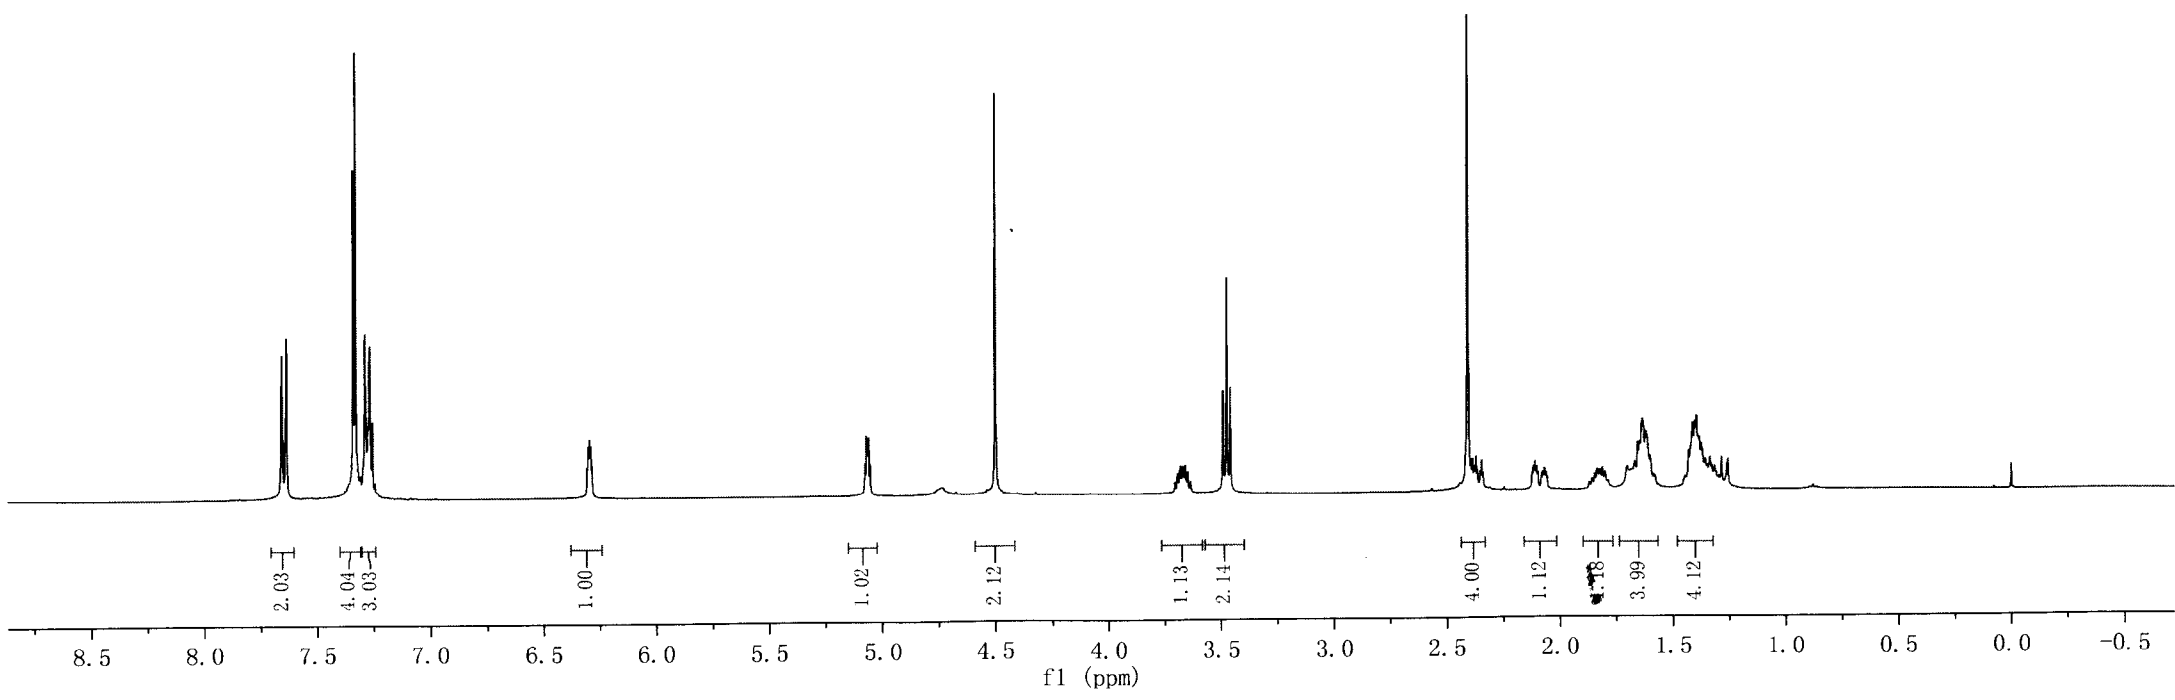

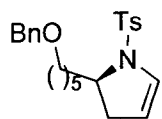

2d

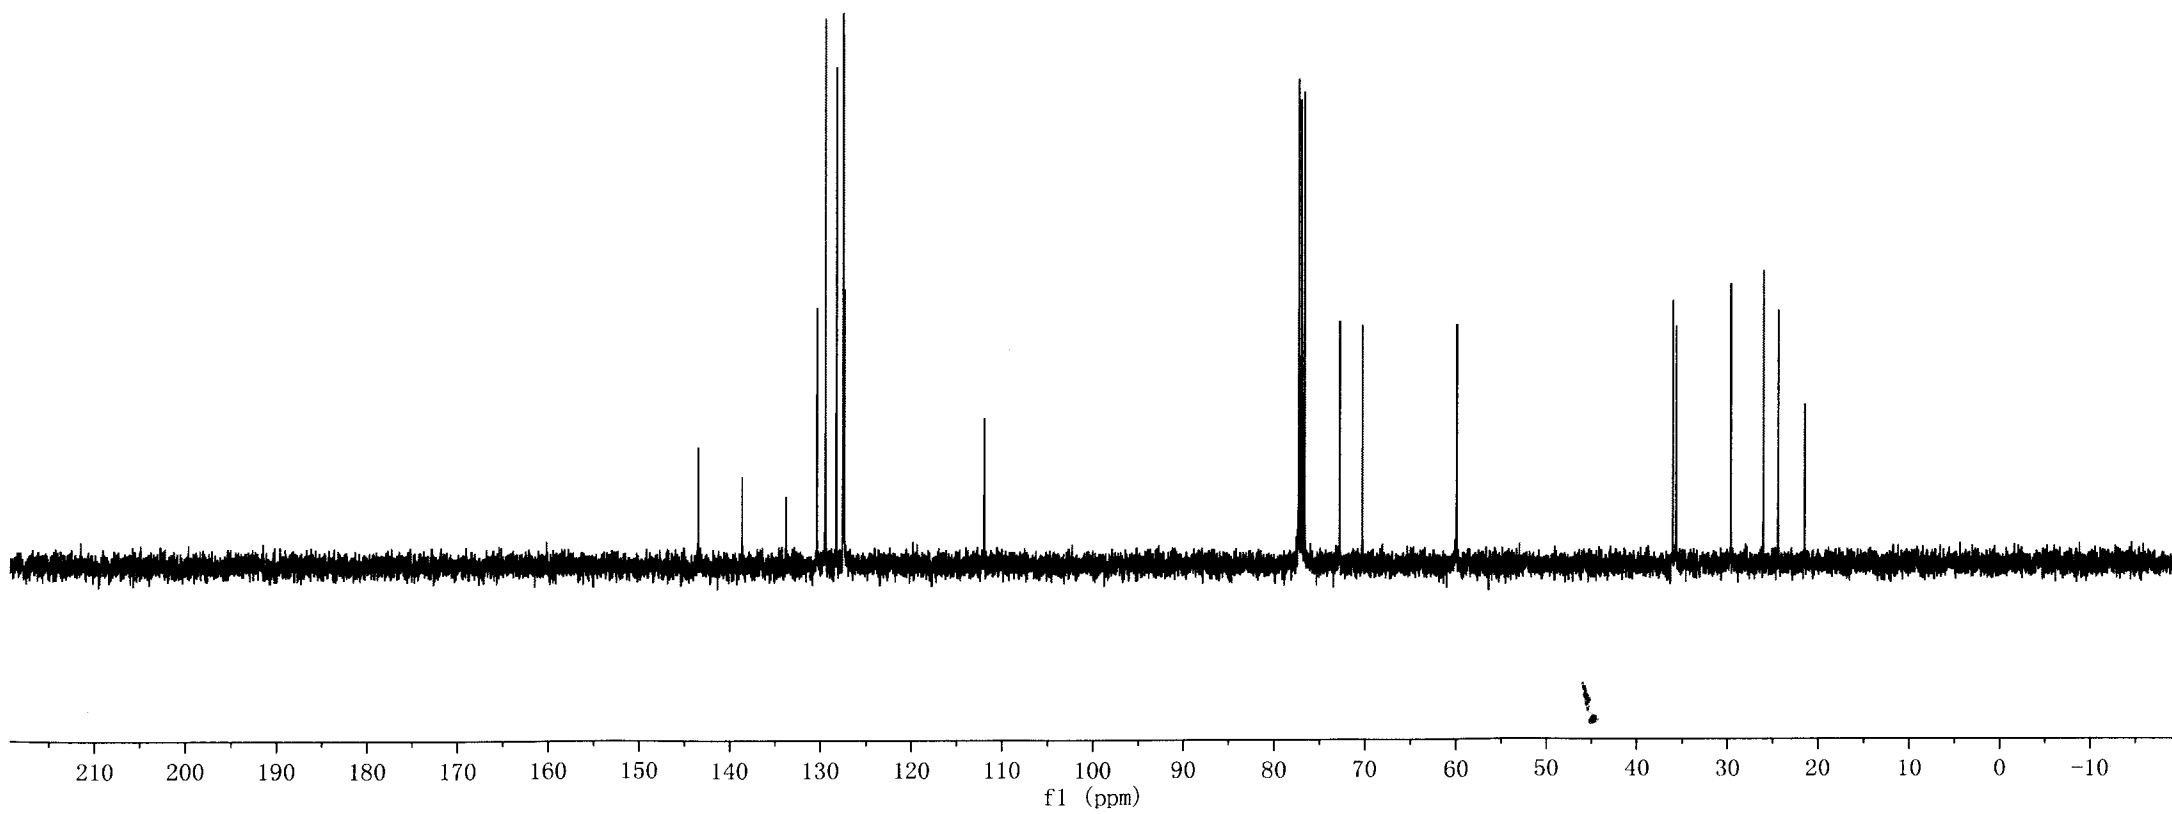

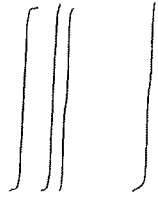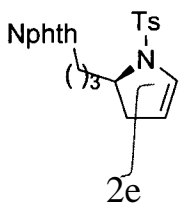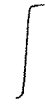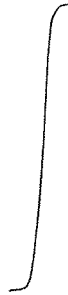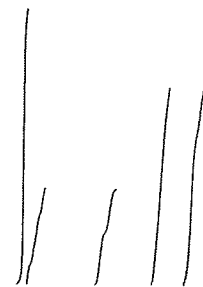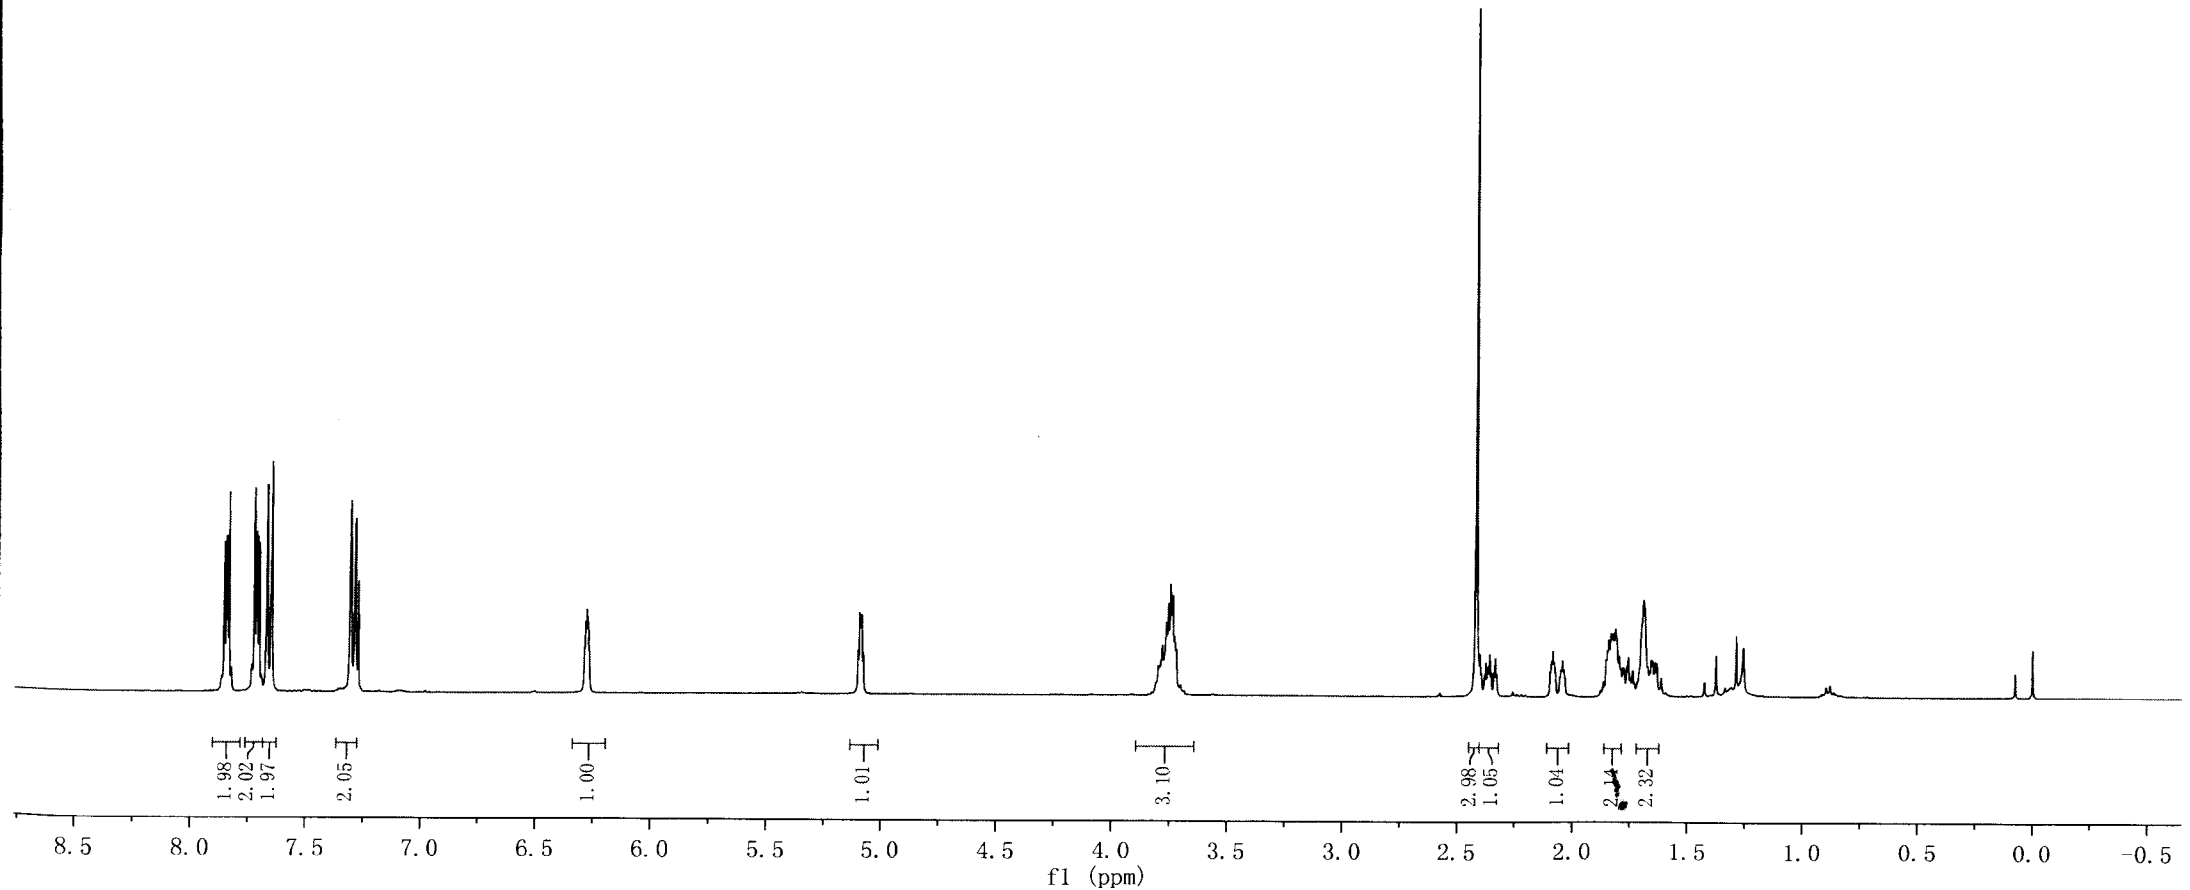

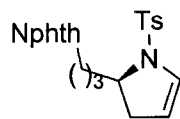

2e

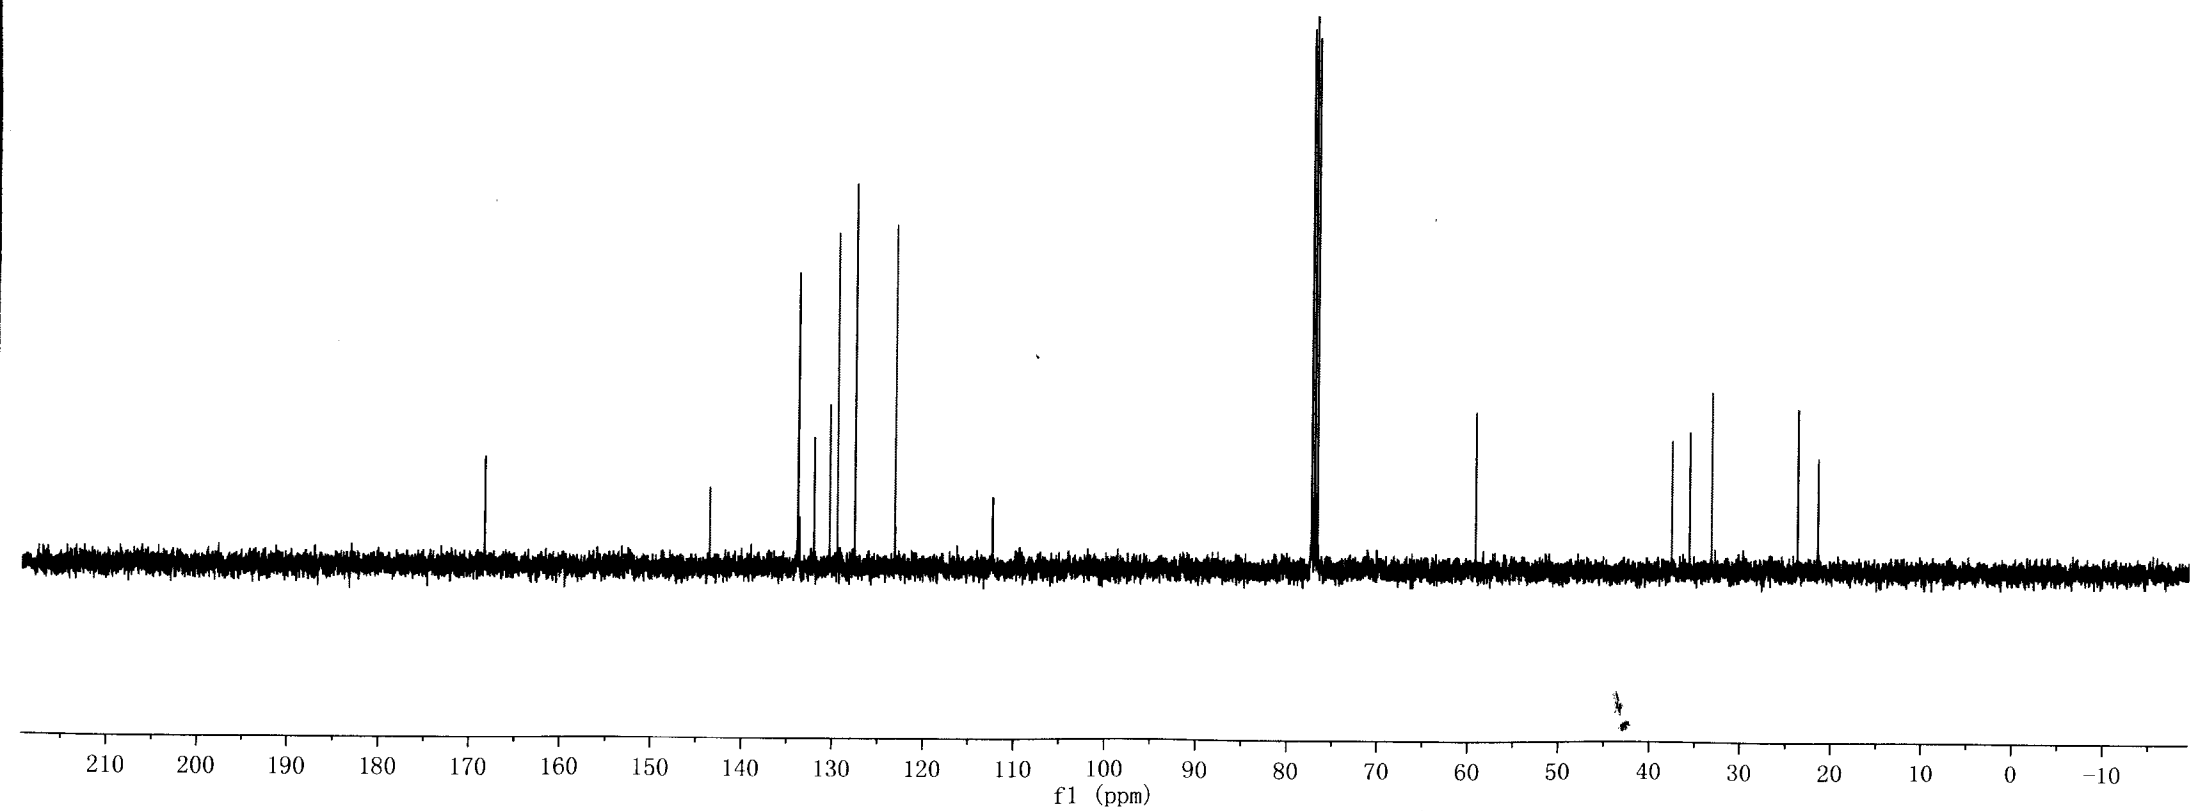

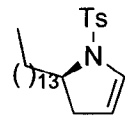

2f

/ /

s

s

s

s

s

s

s

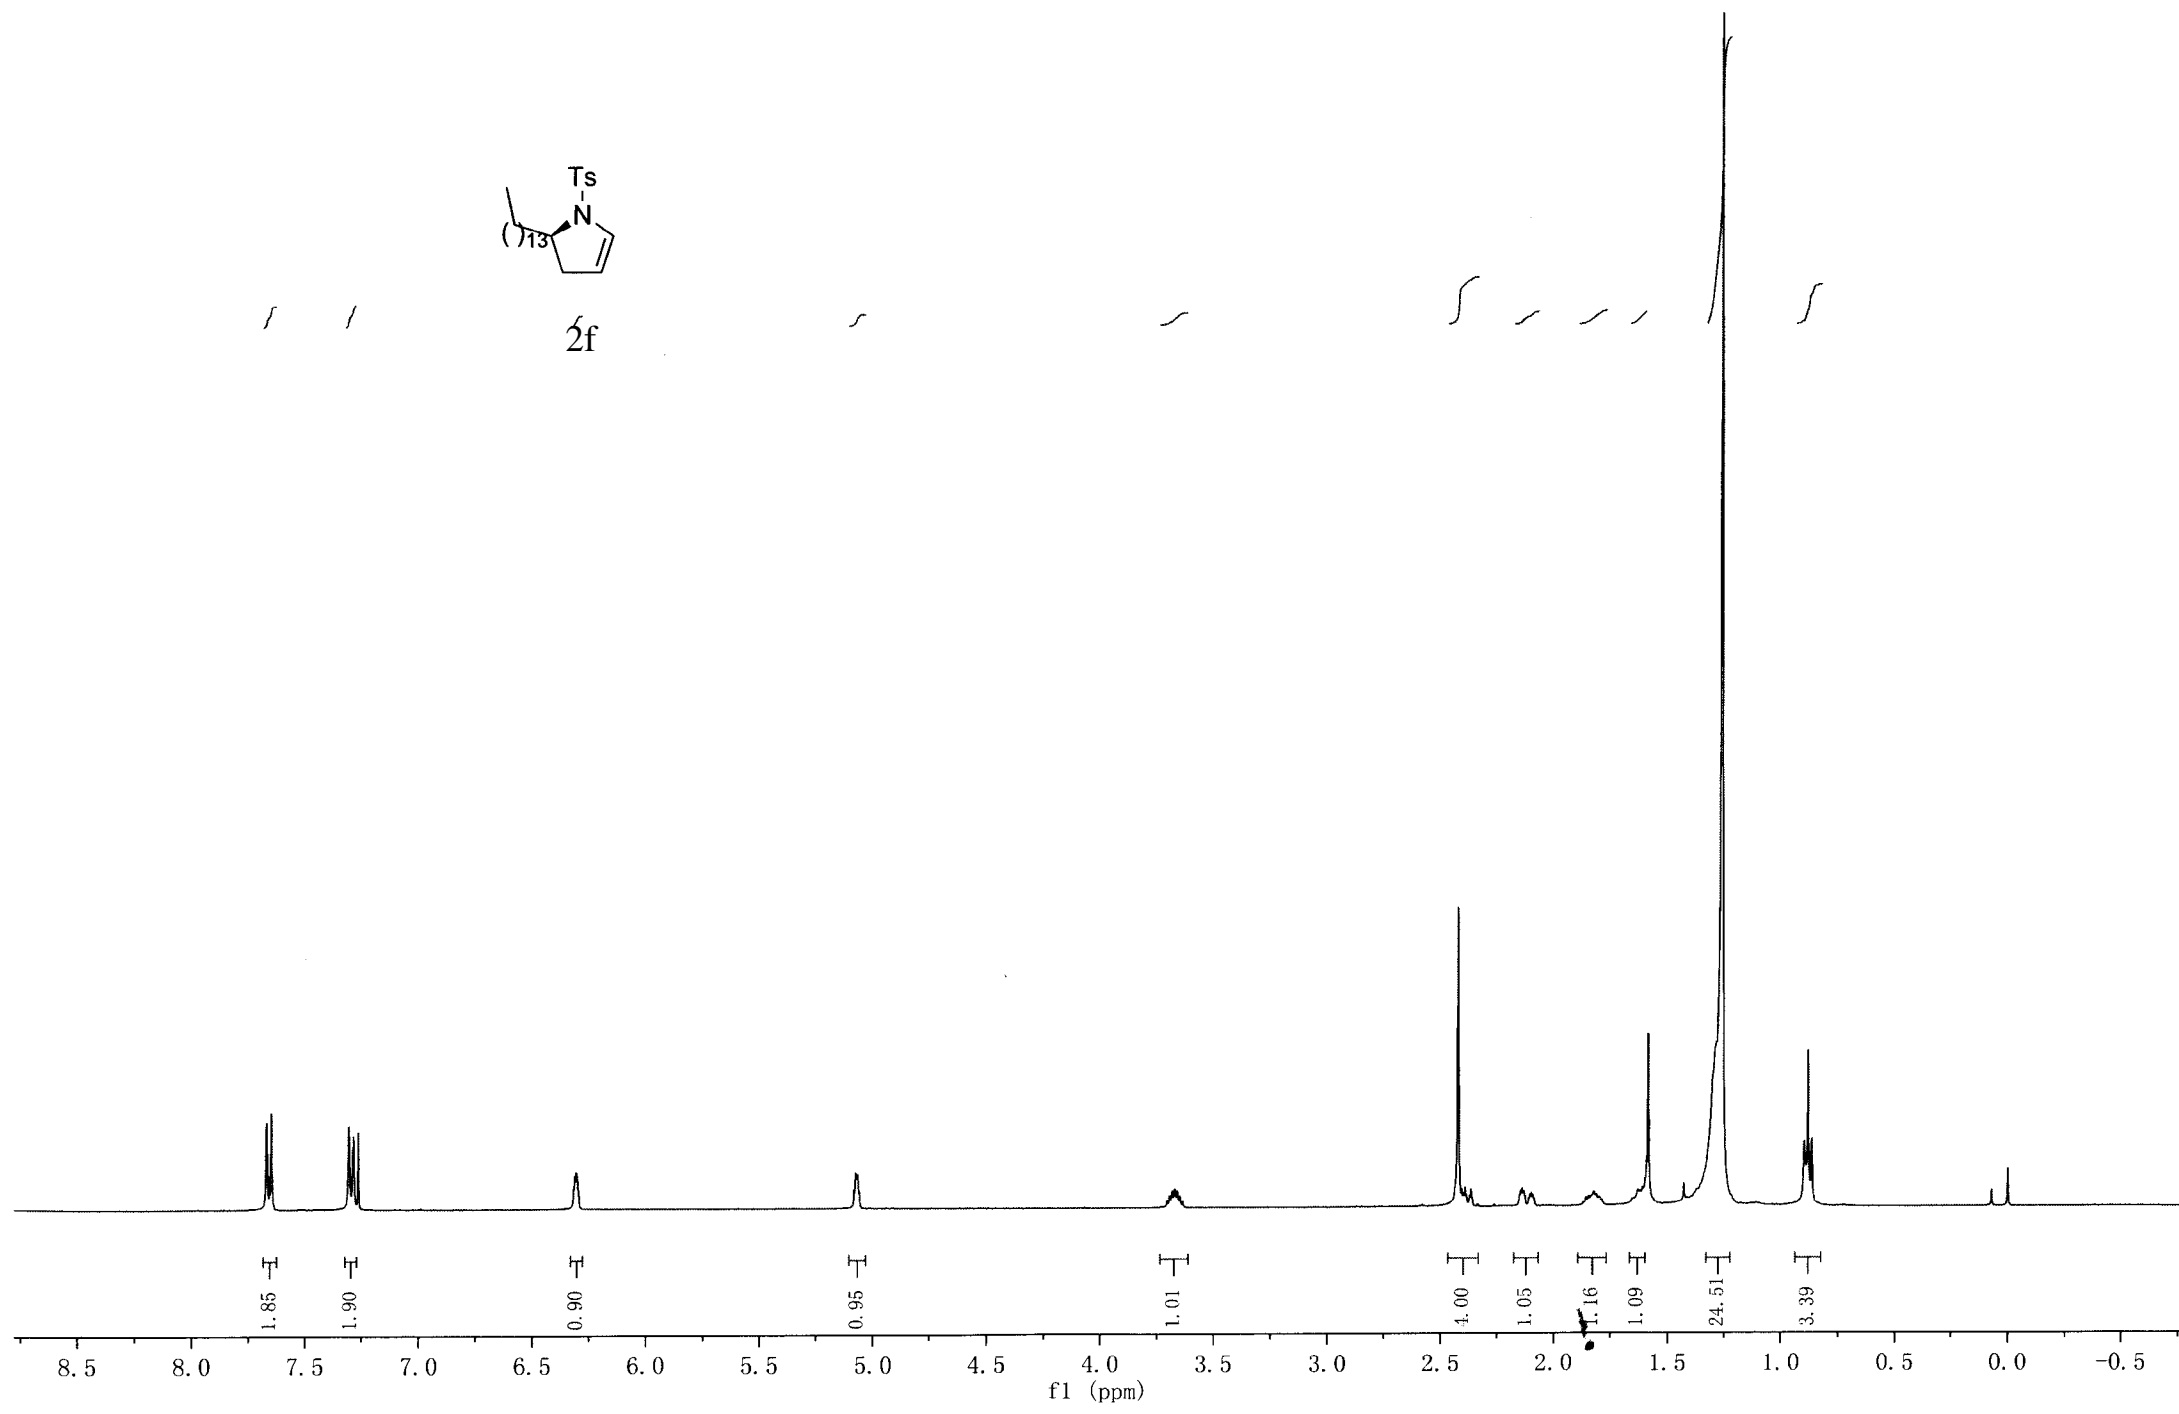

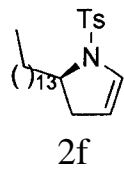

210 200 190 180 170 160 150 140 130 120 110 100 90 80 70 60 50 40 30 20 10 0 -10

f1 (ppm)

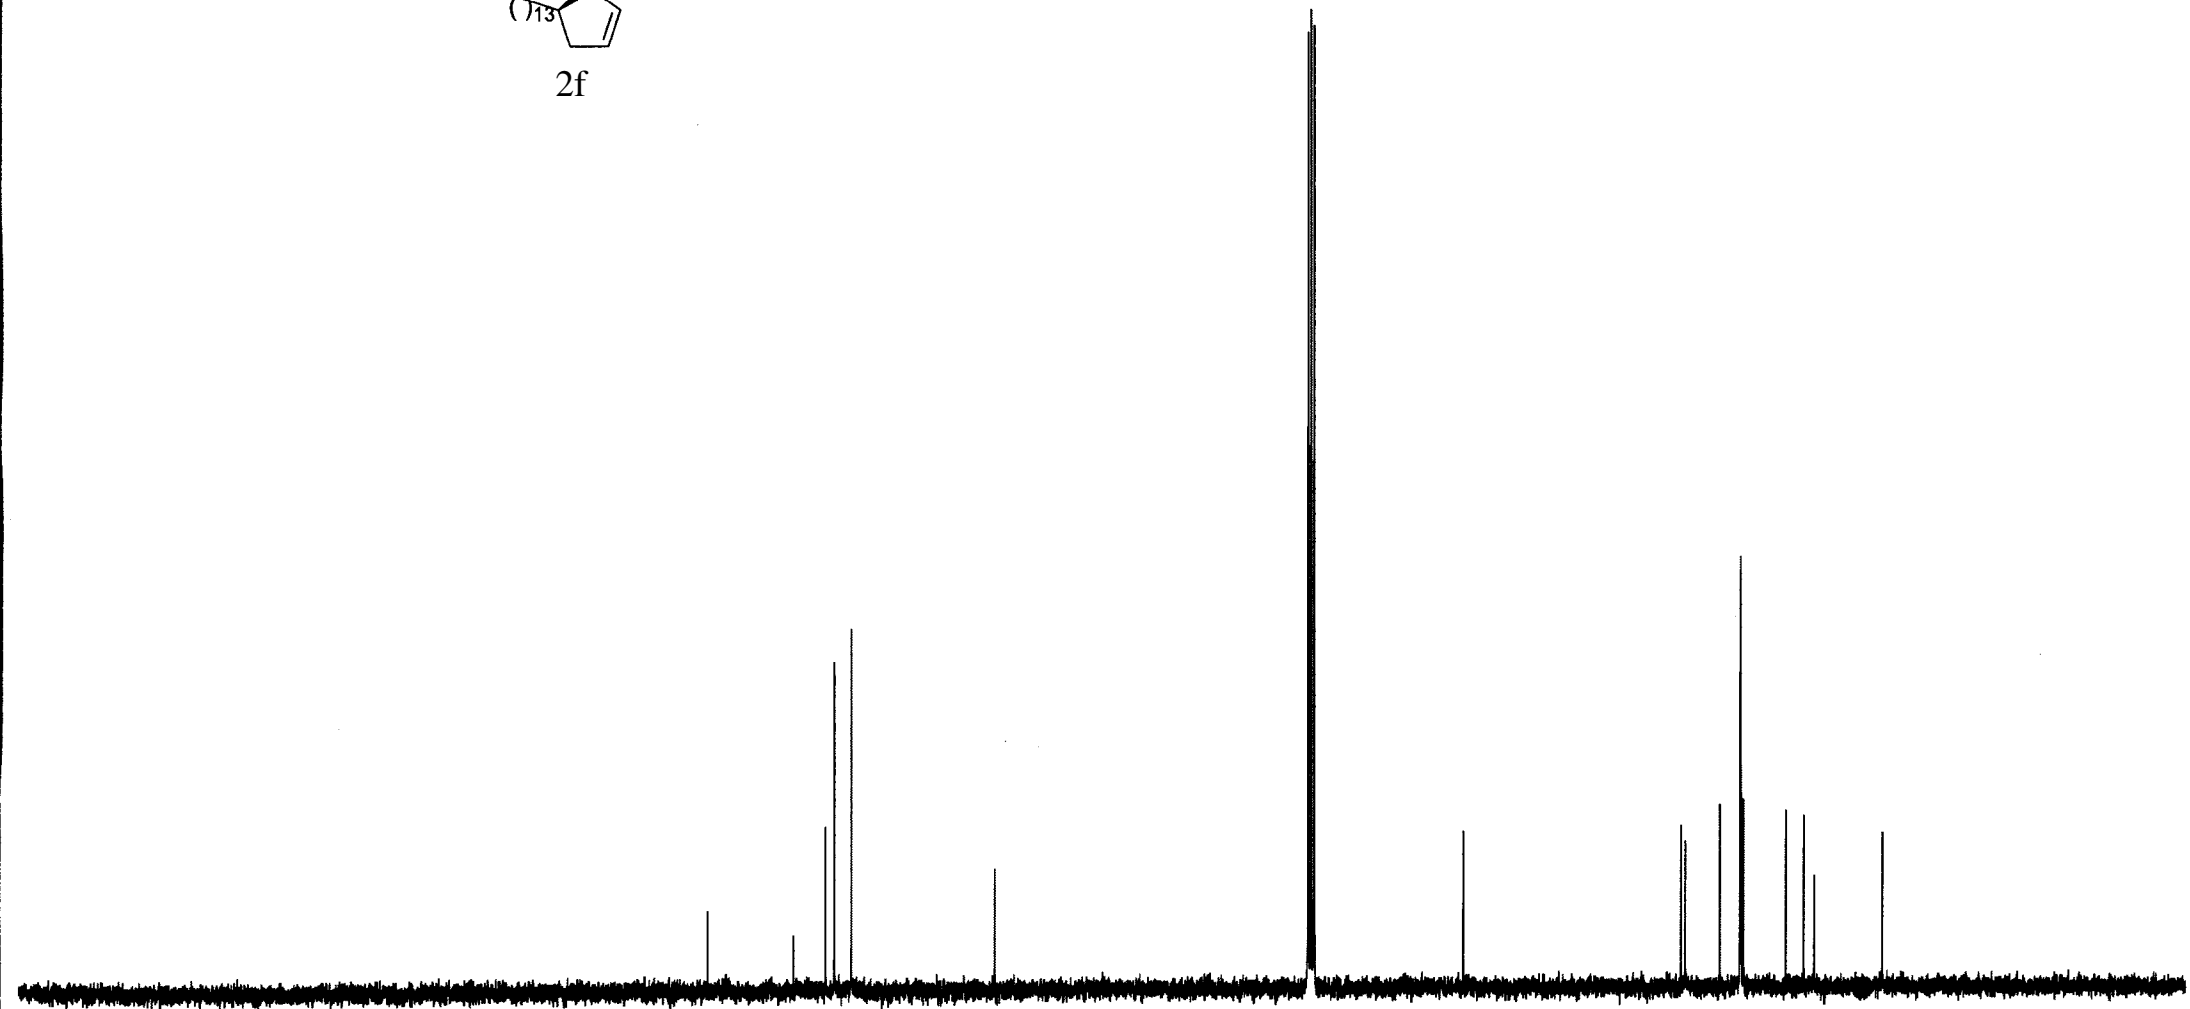

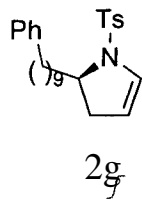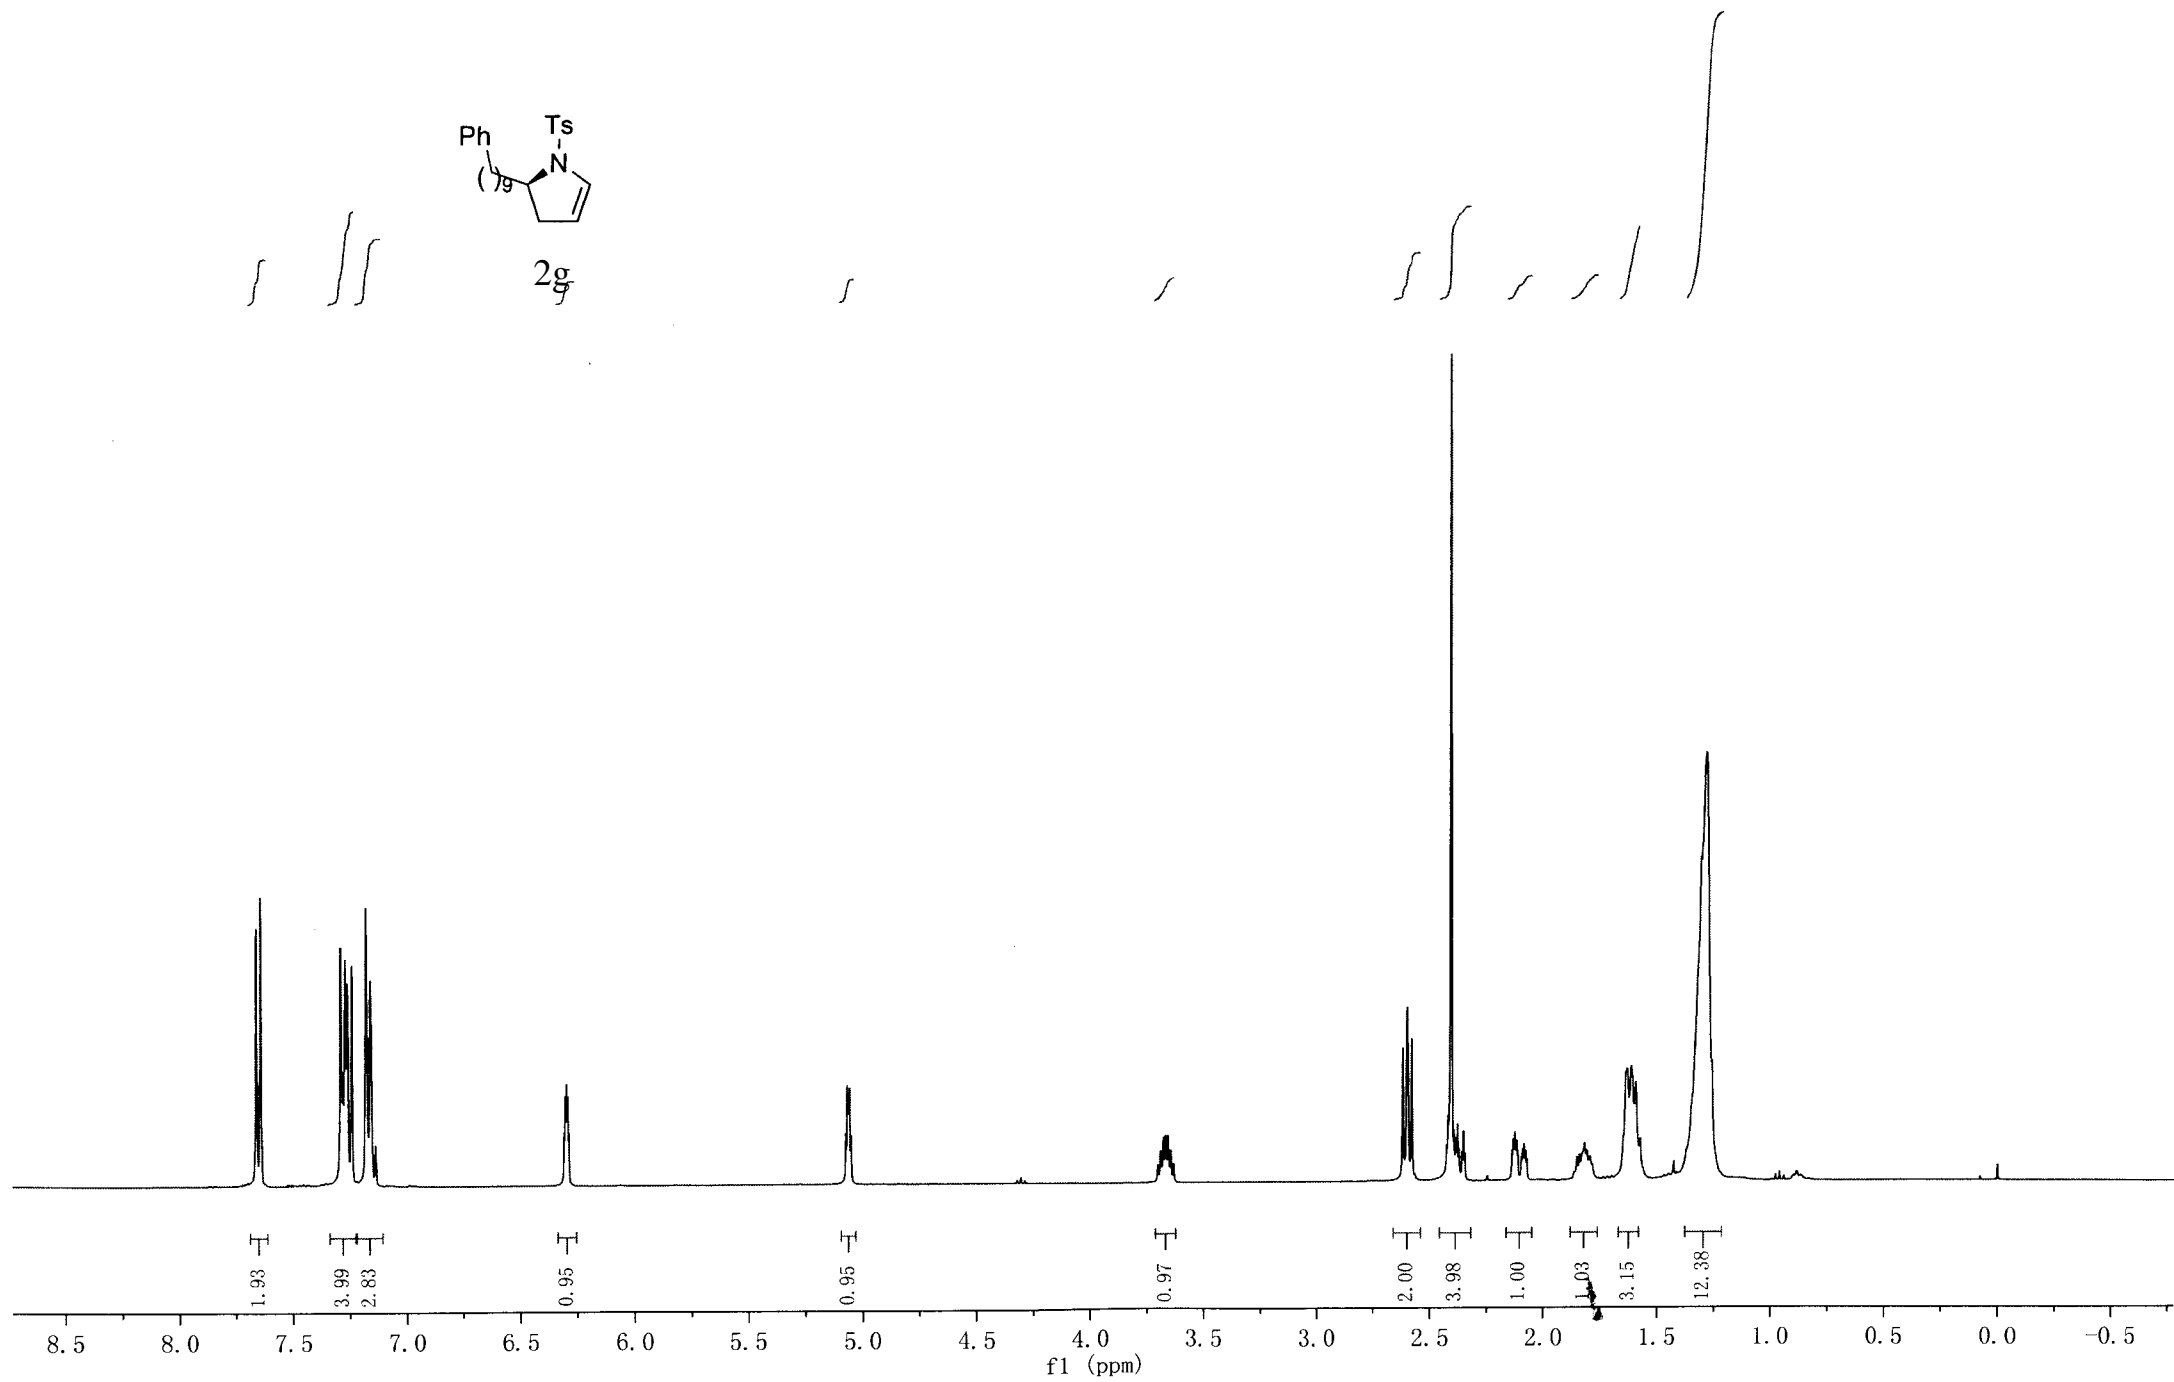



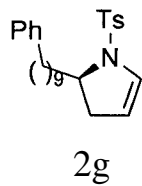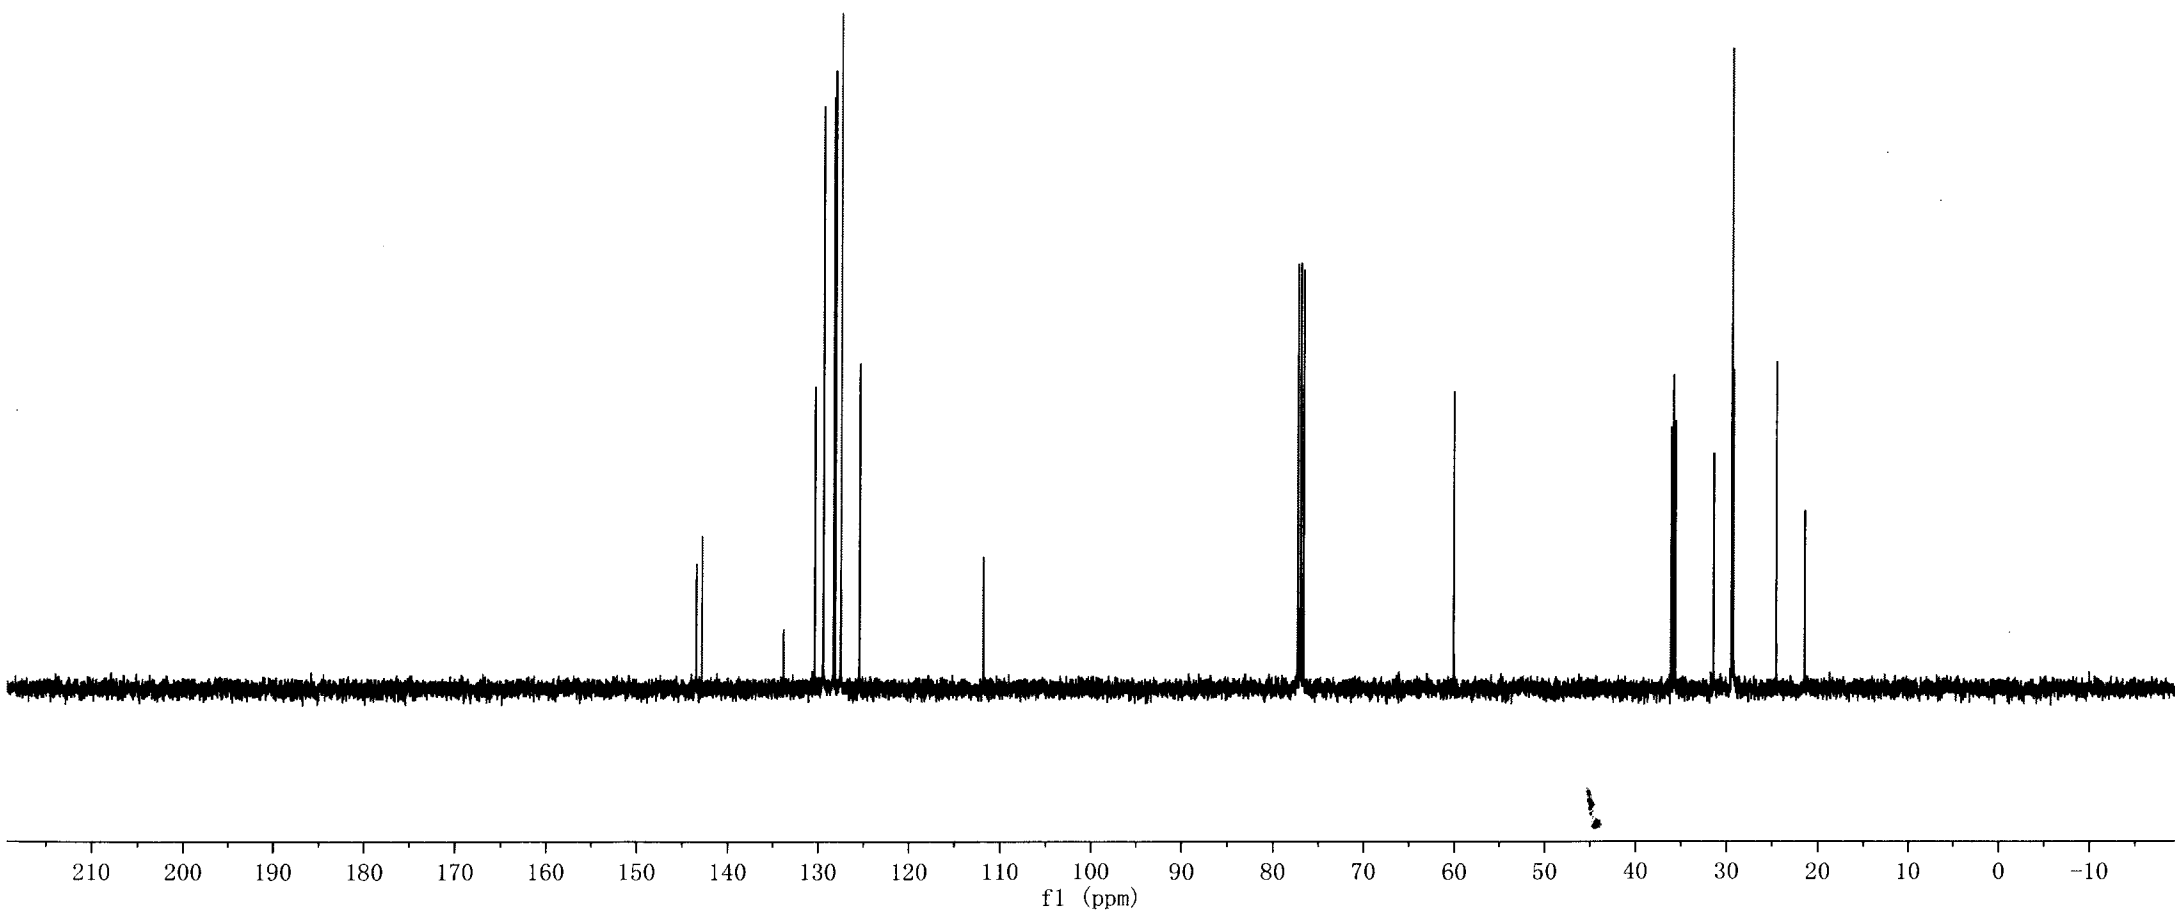

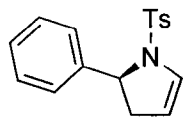

2h

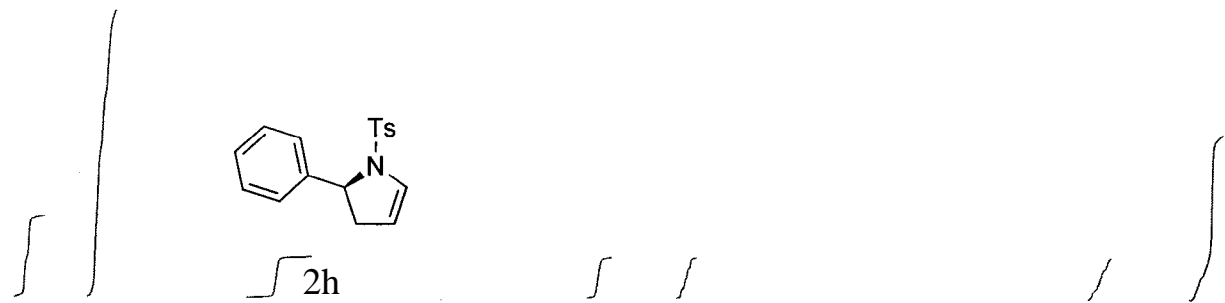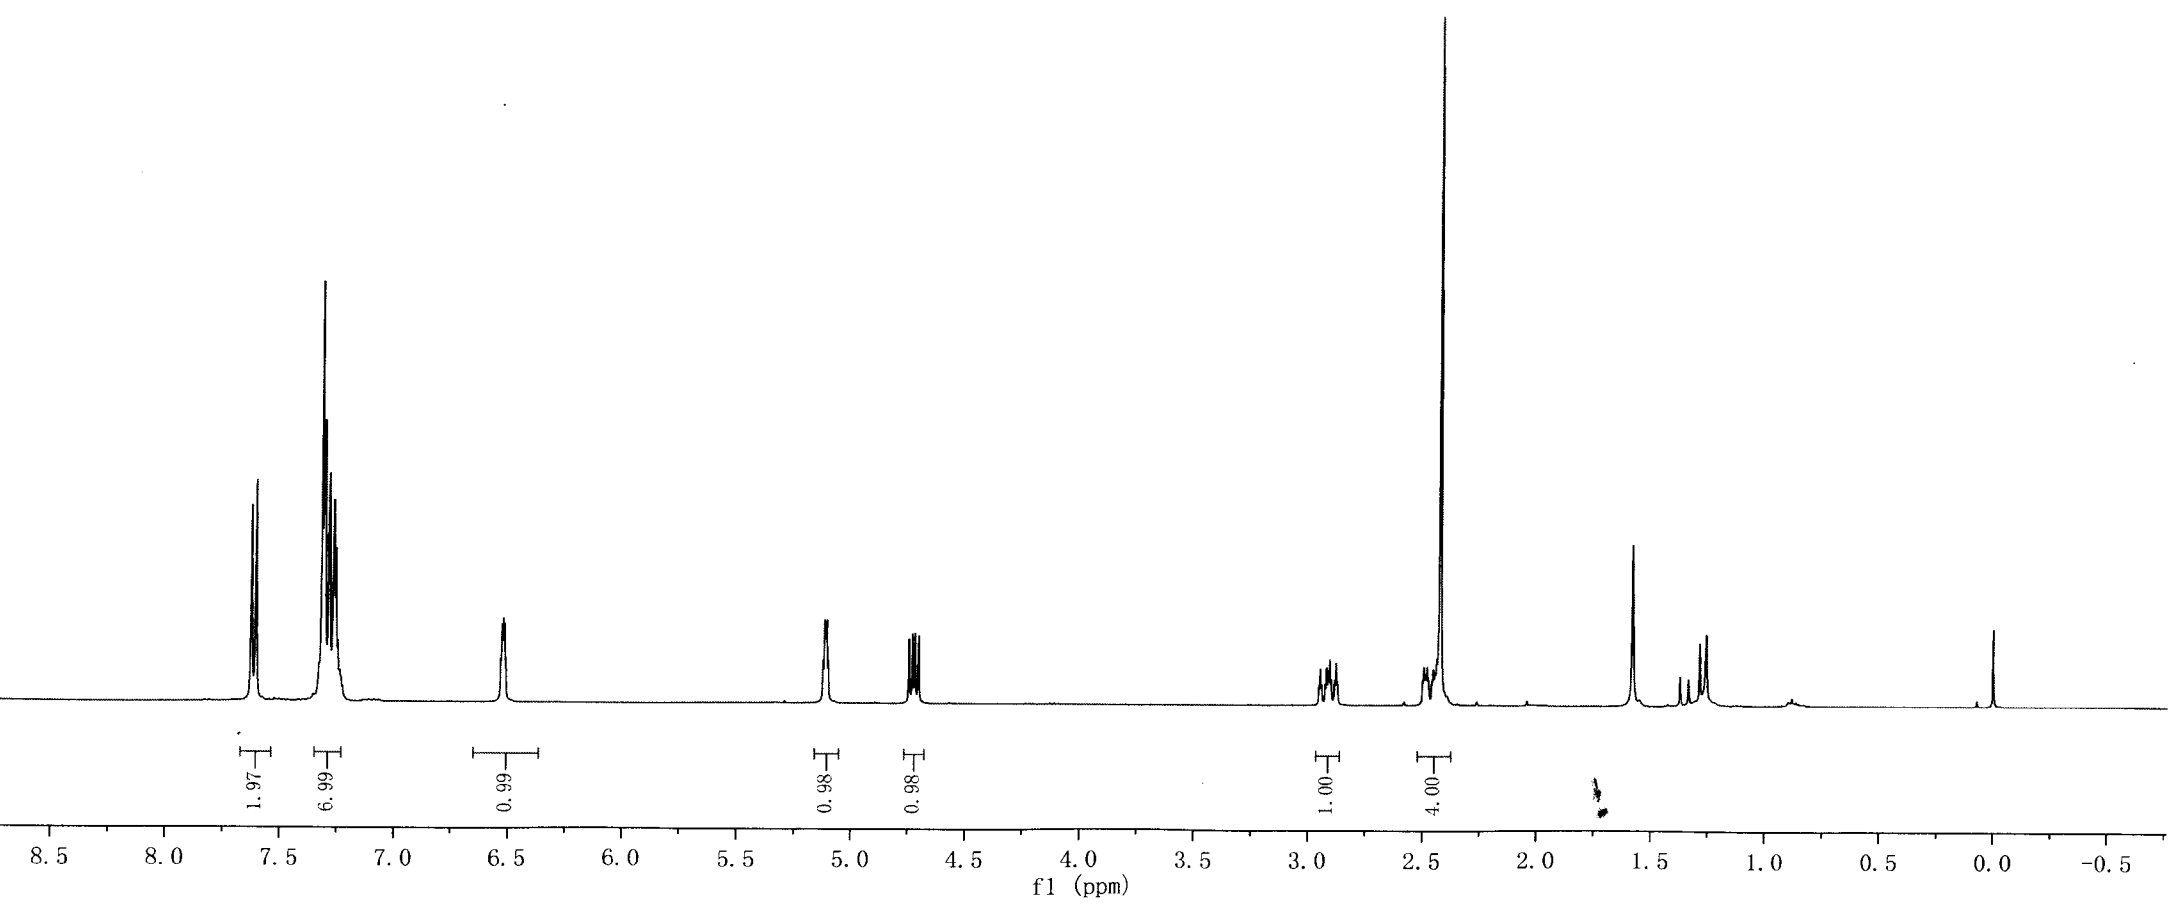

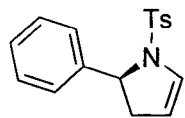

2h

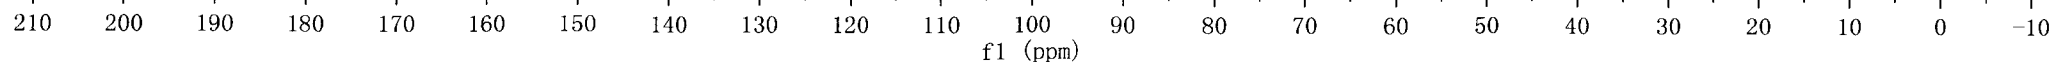

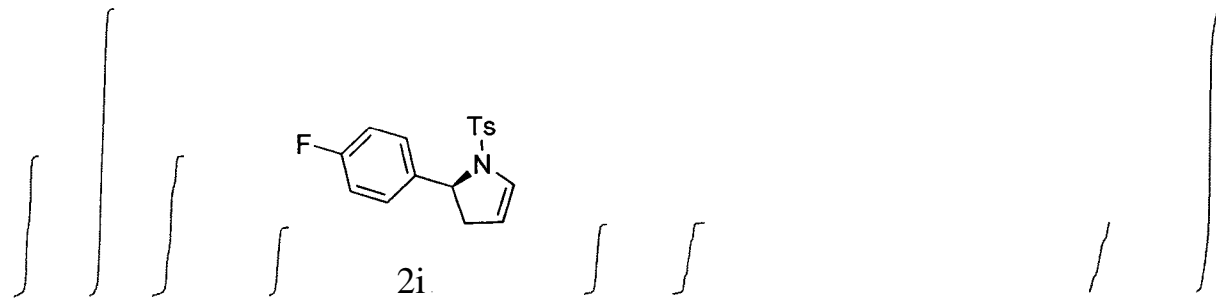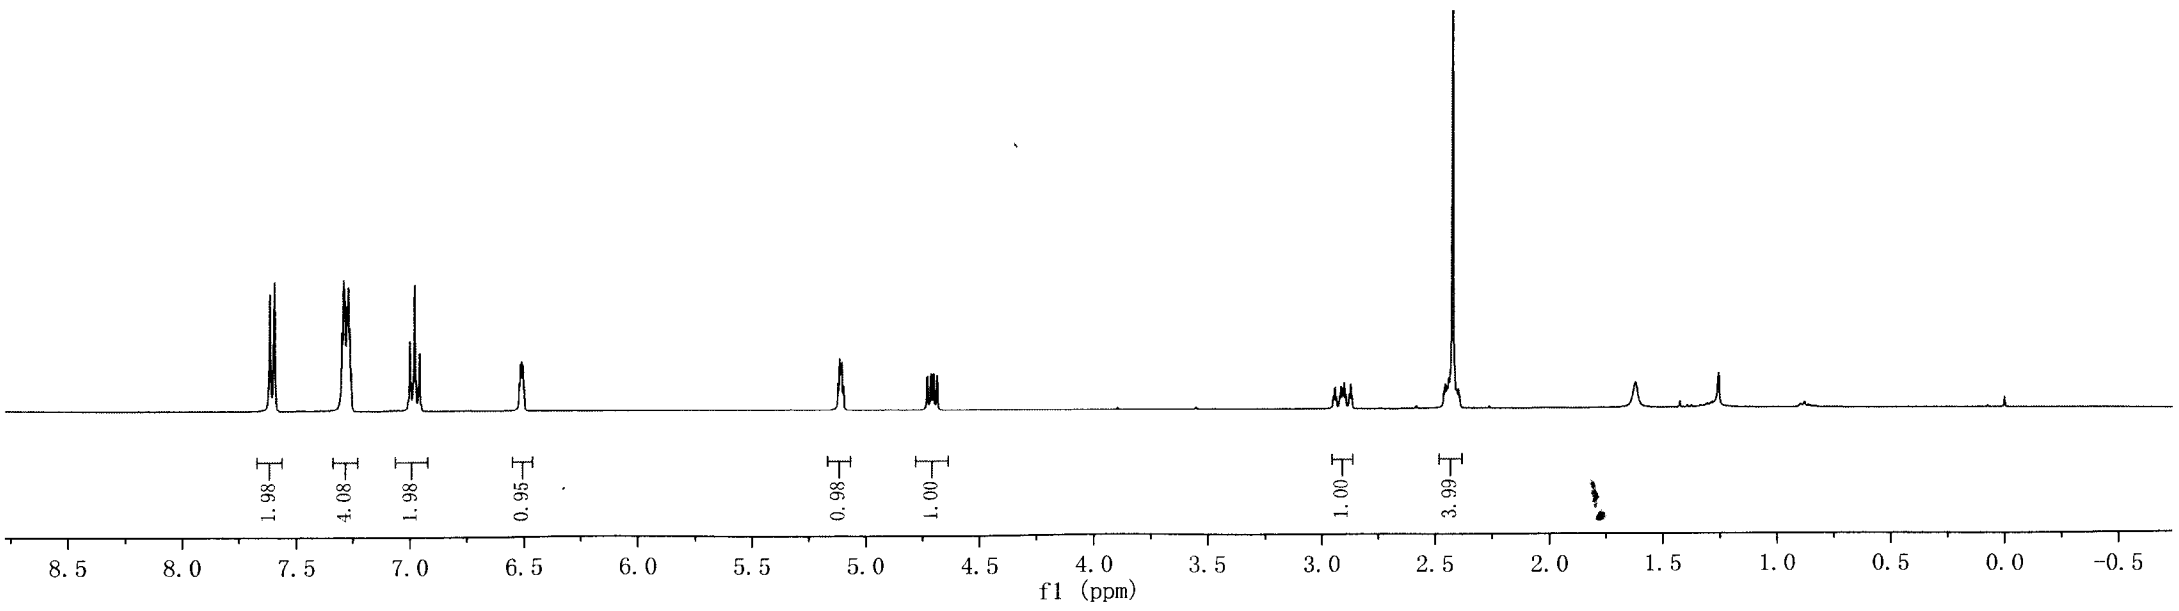

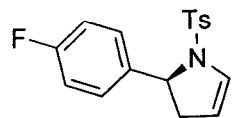

2i

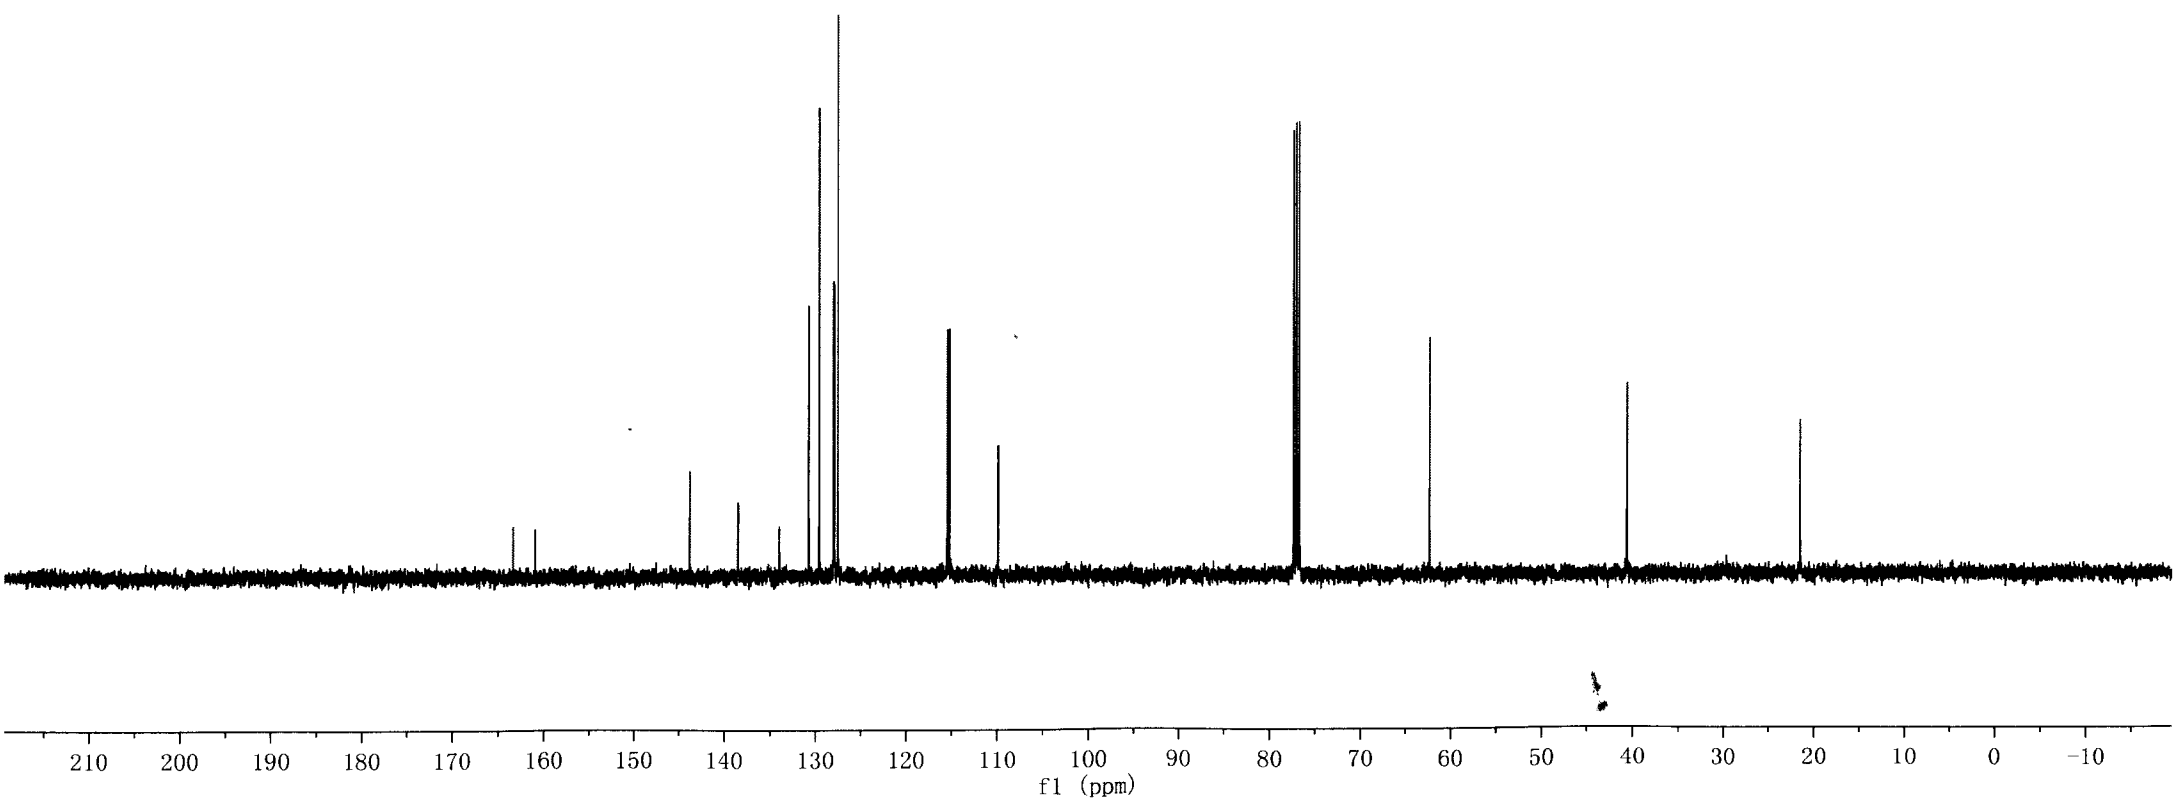

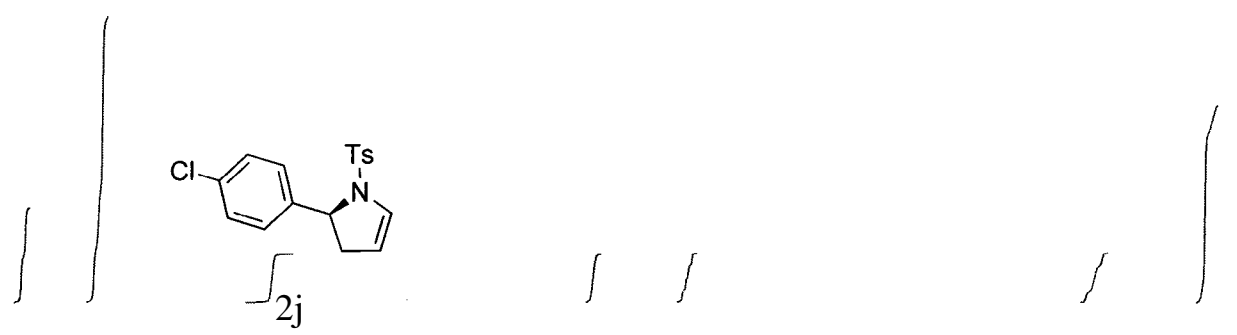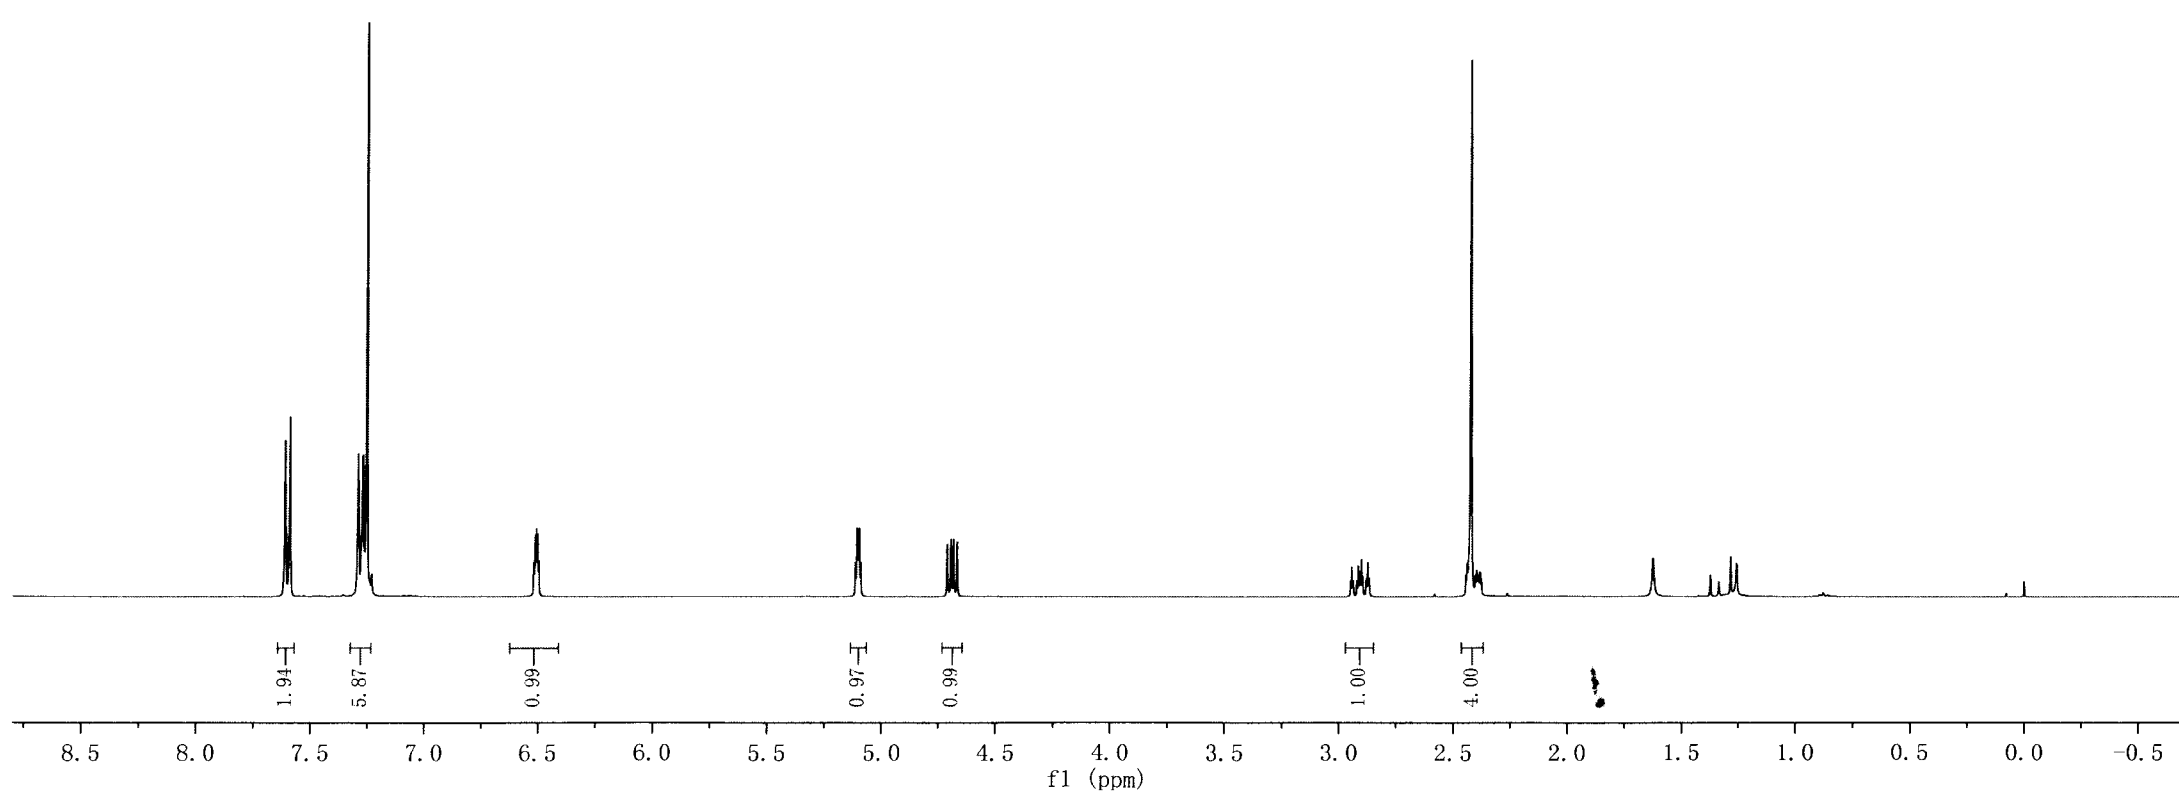

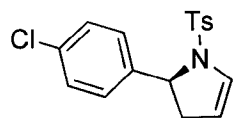

2j

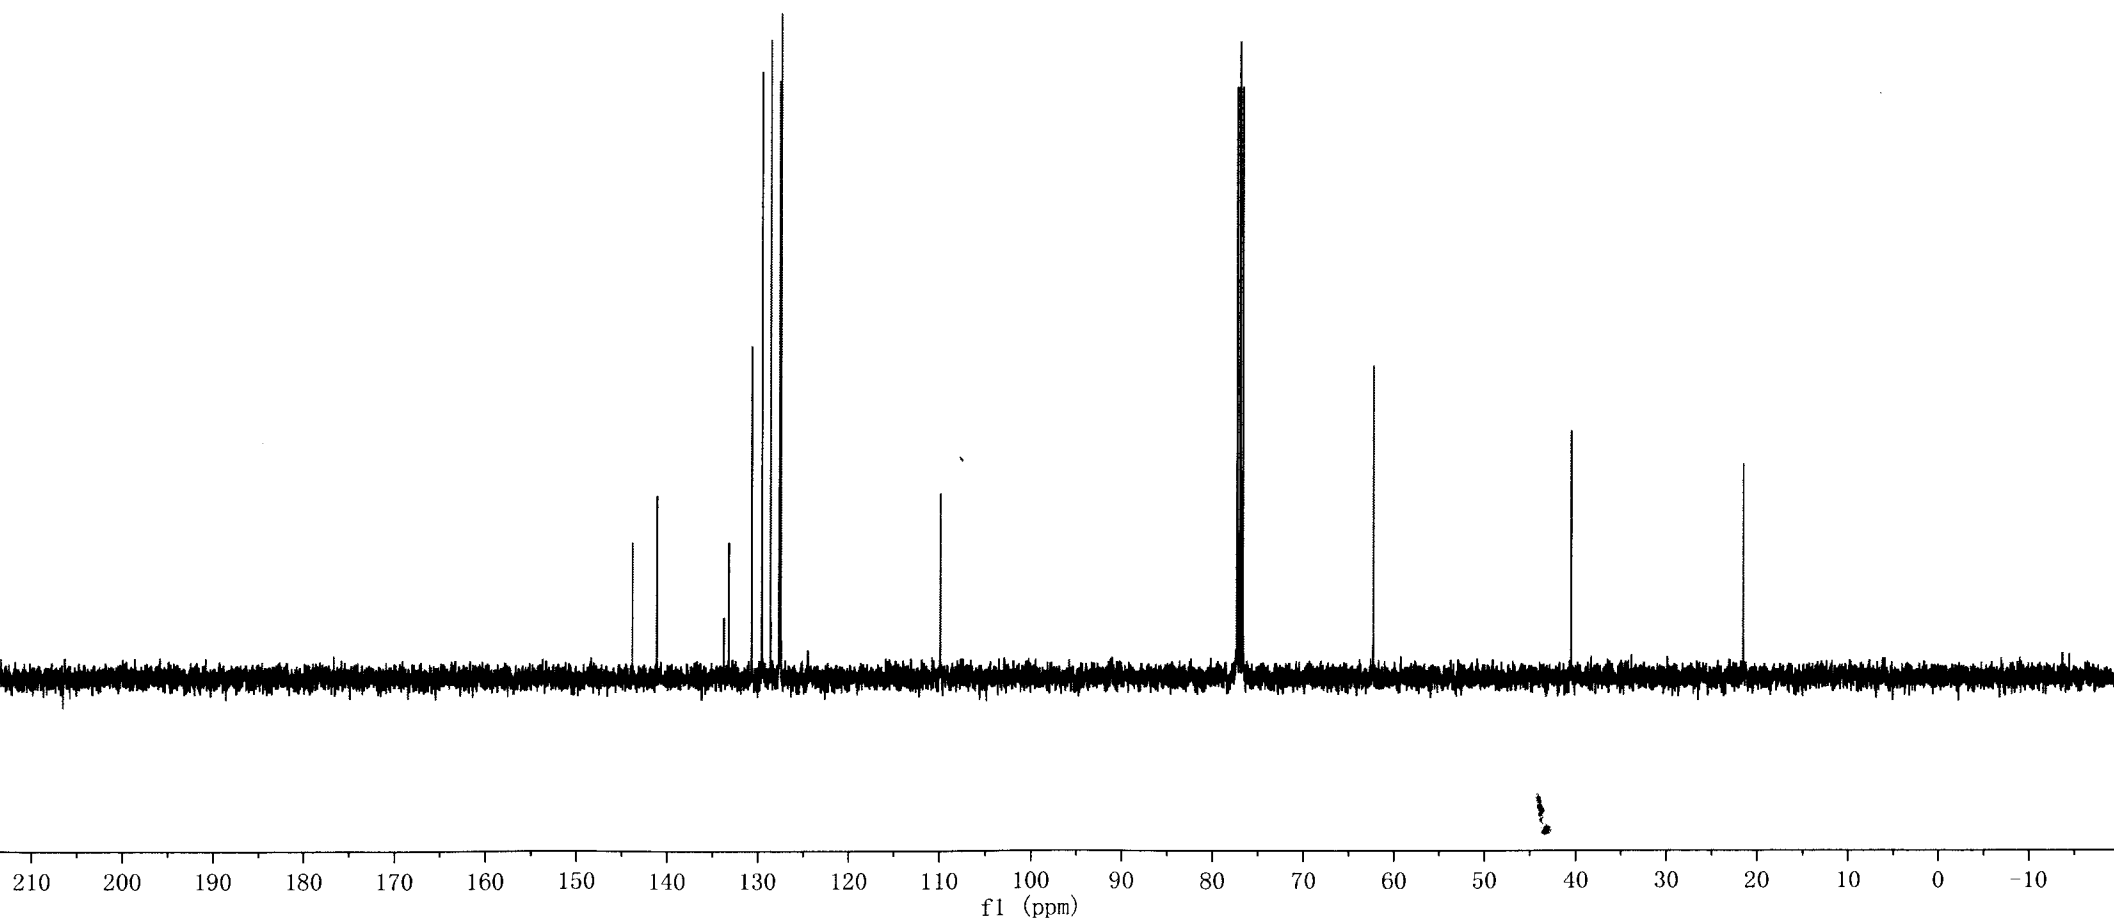

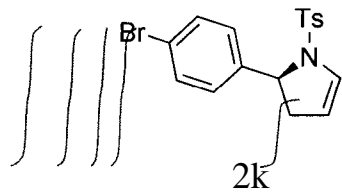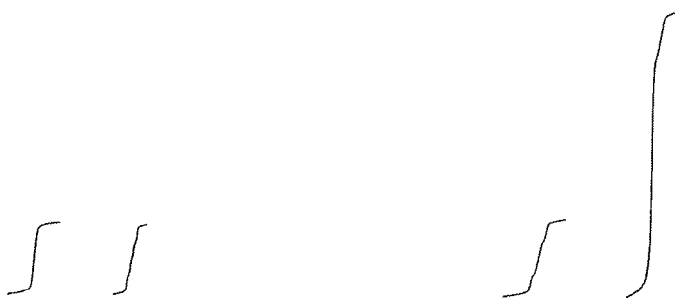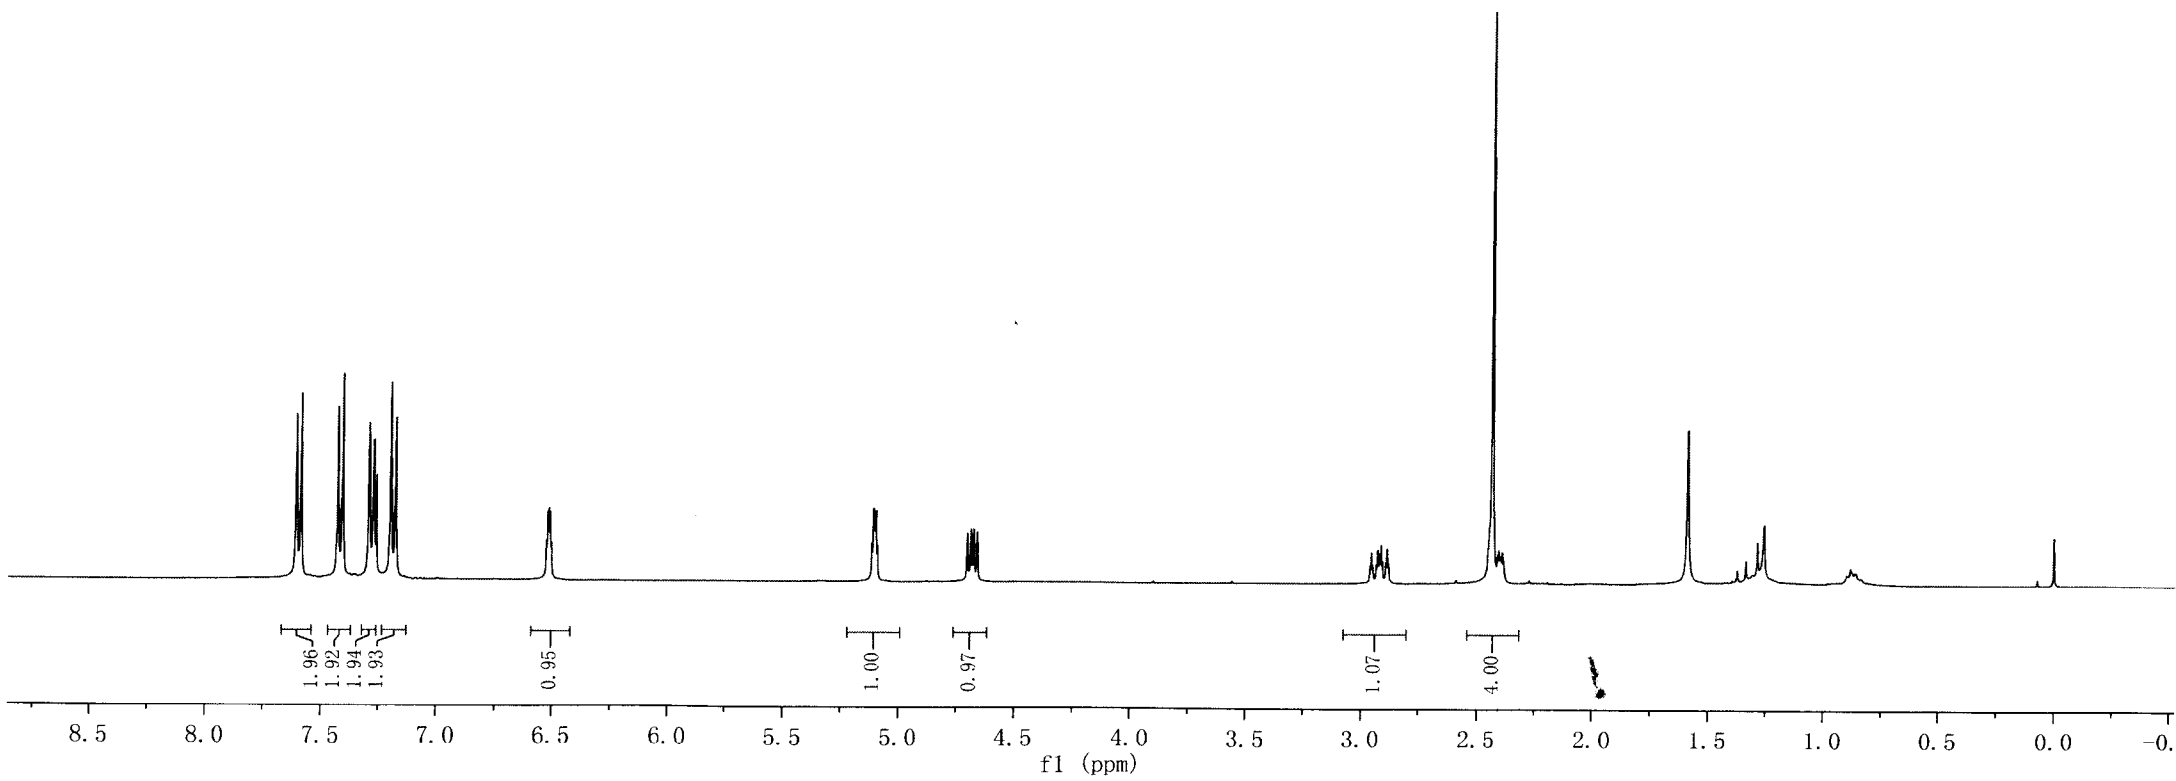



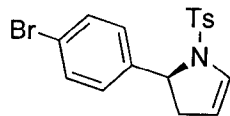

2k

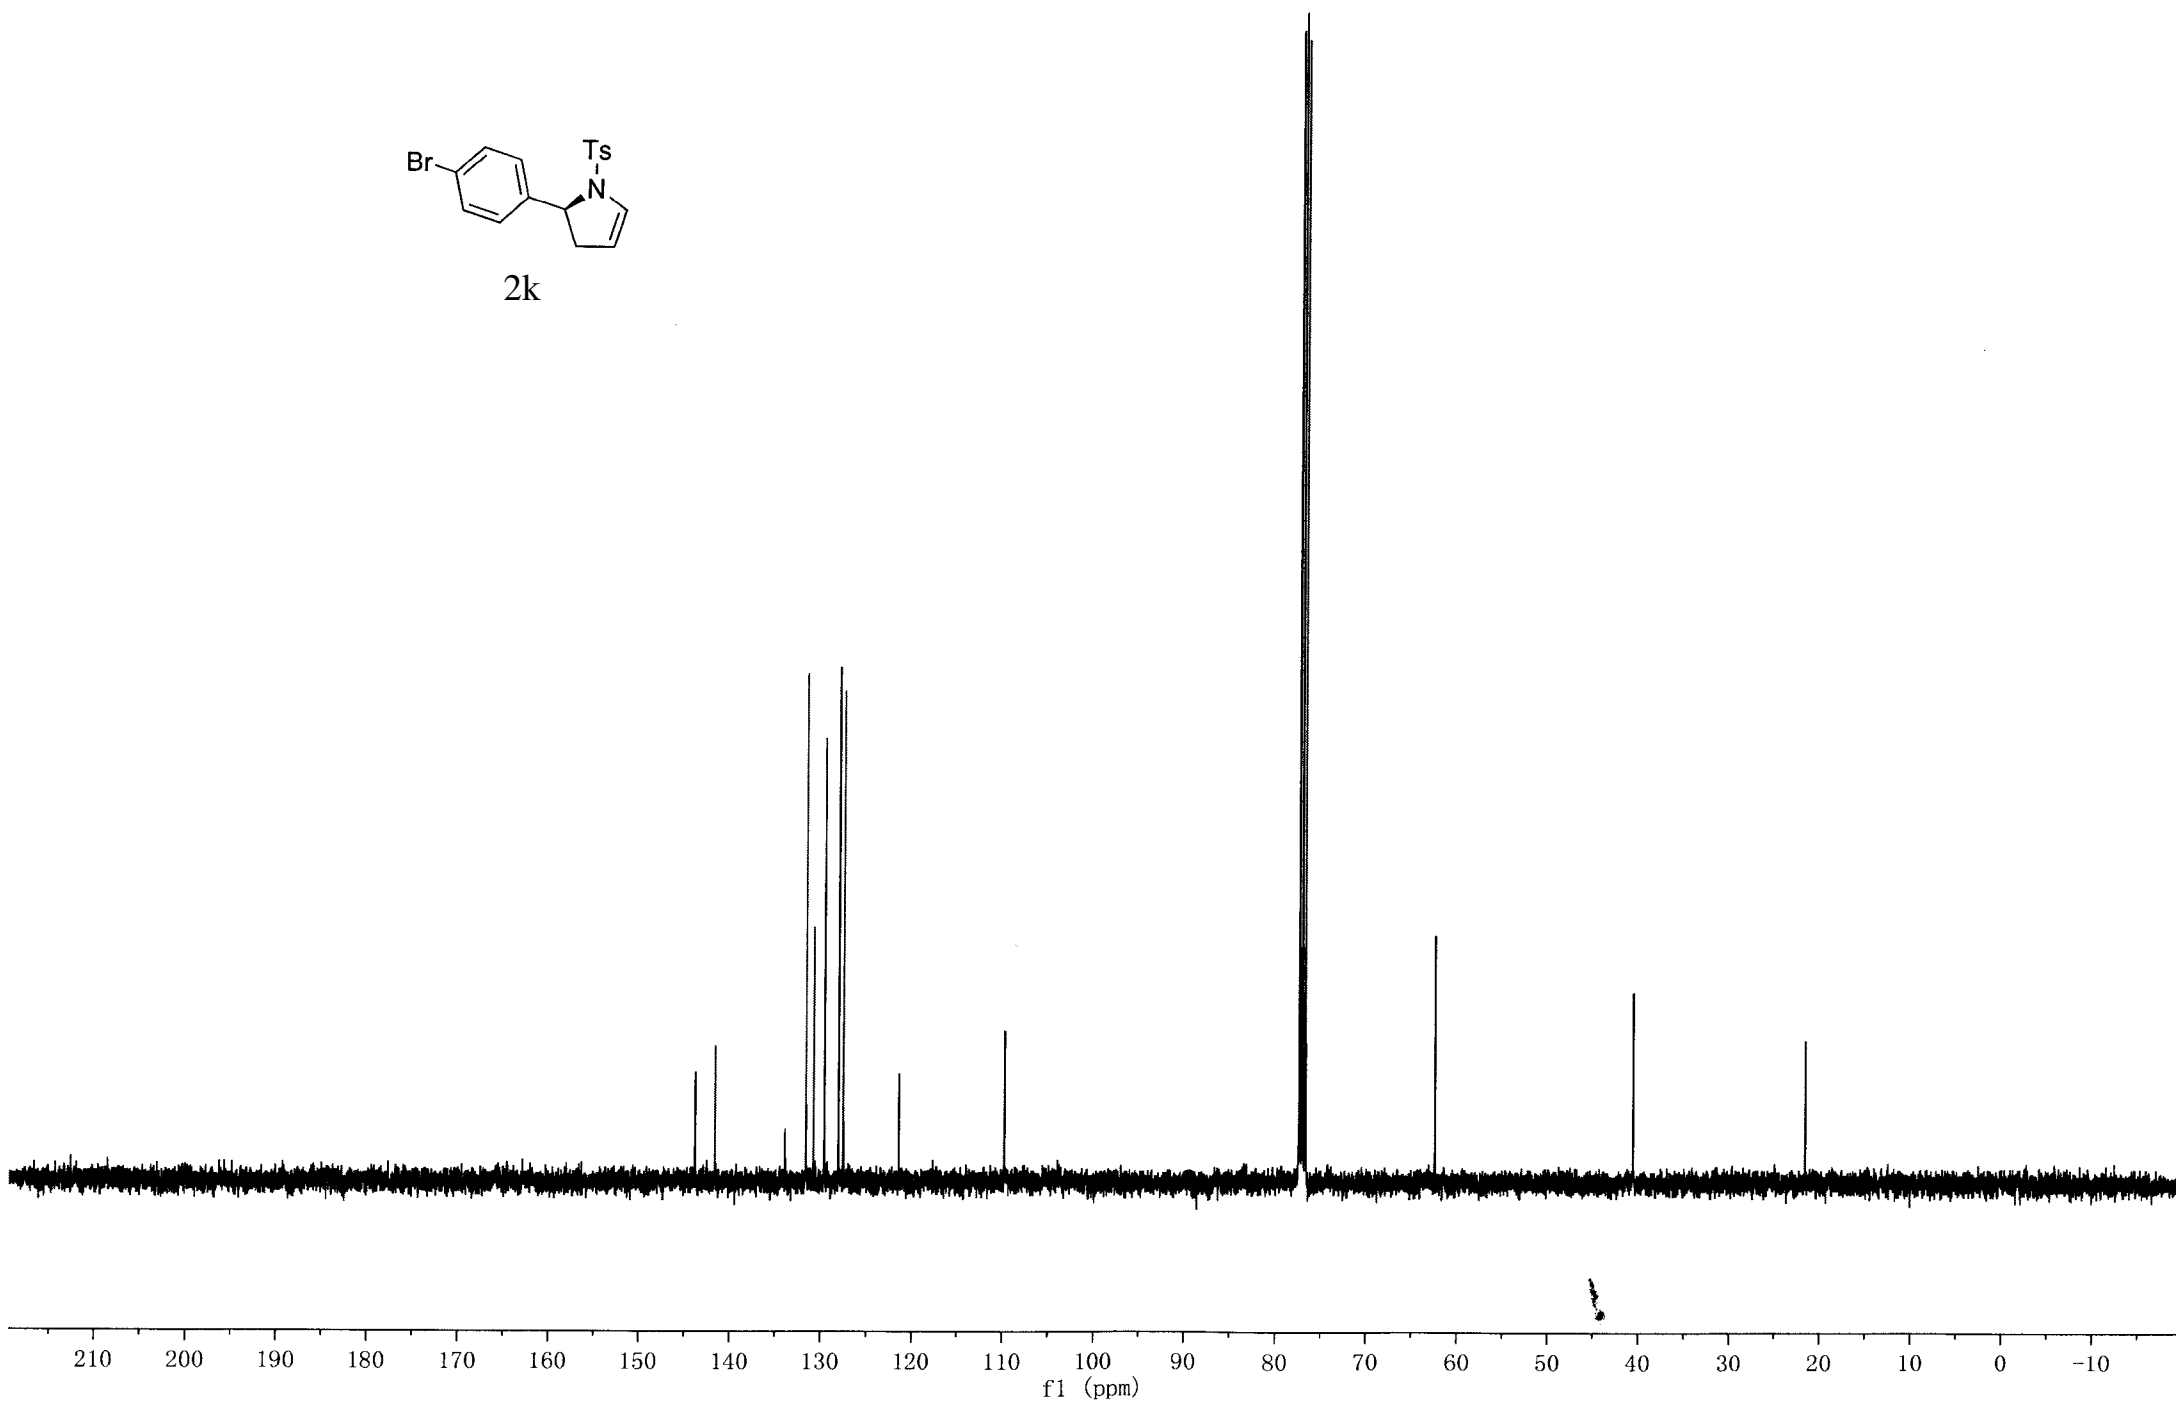

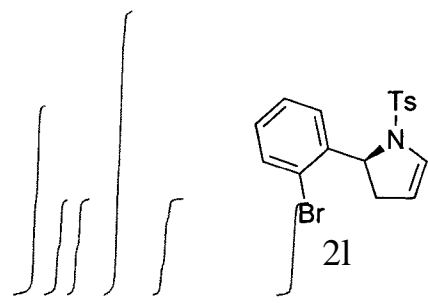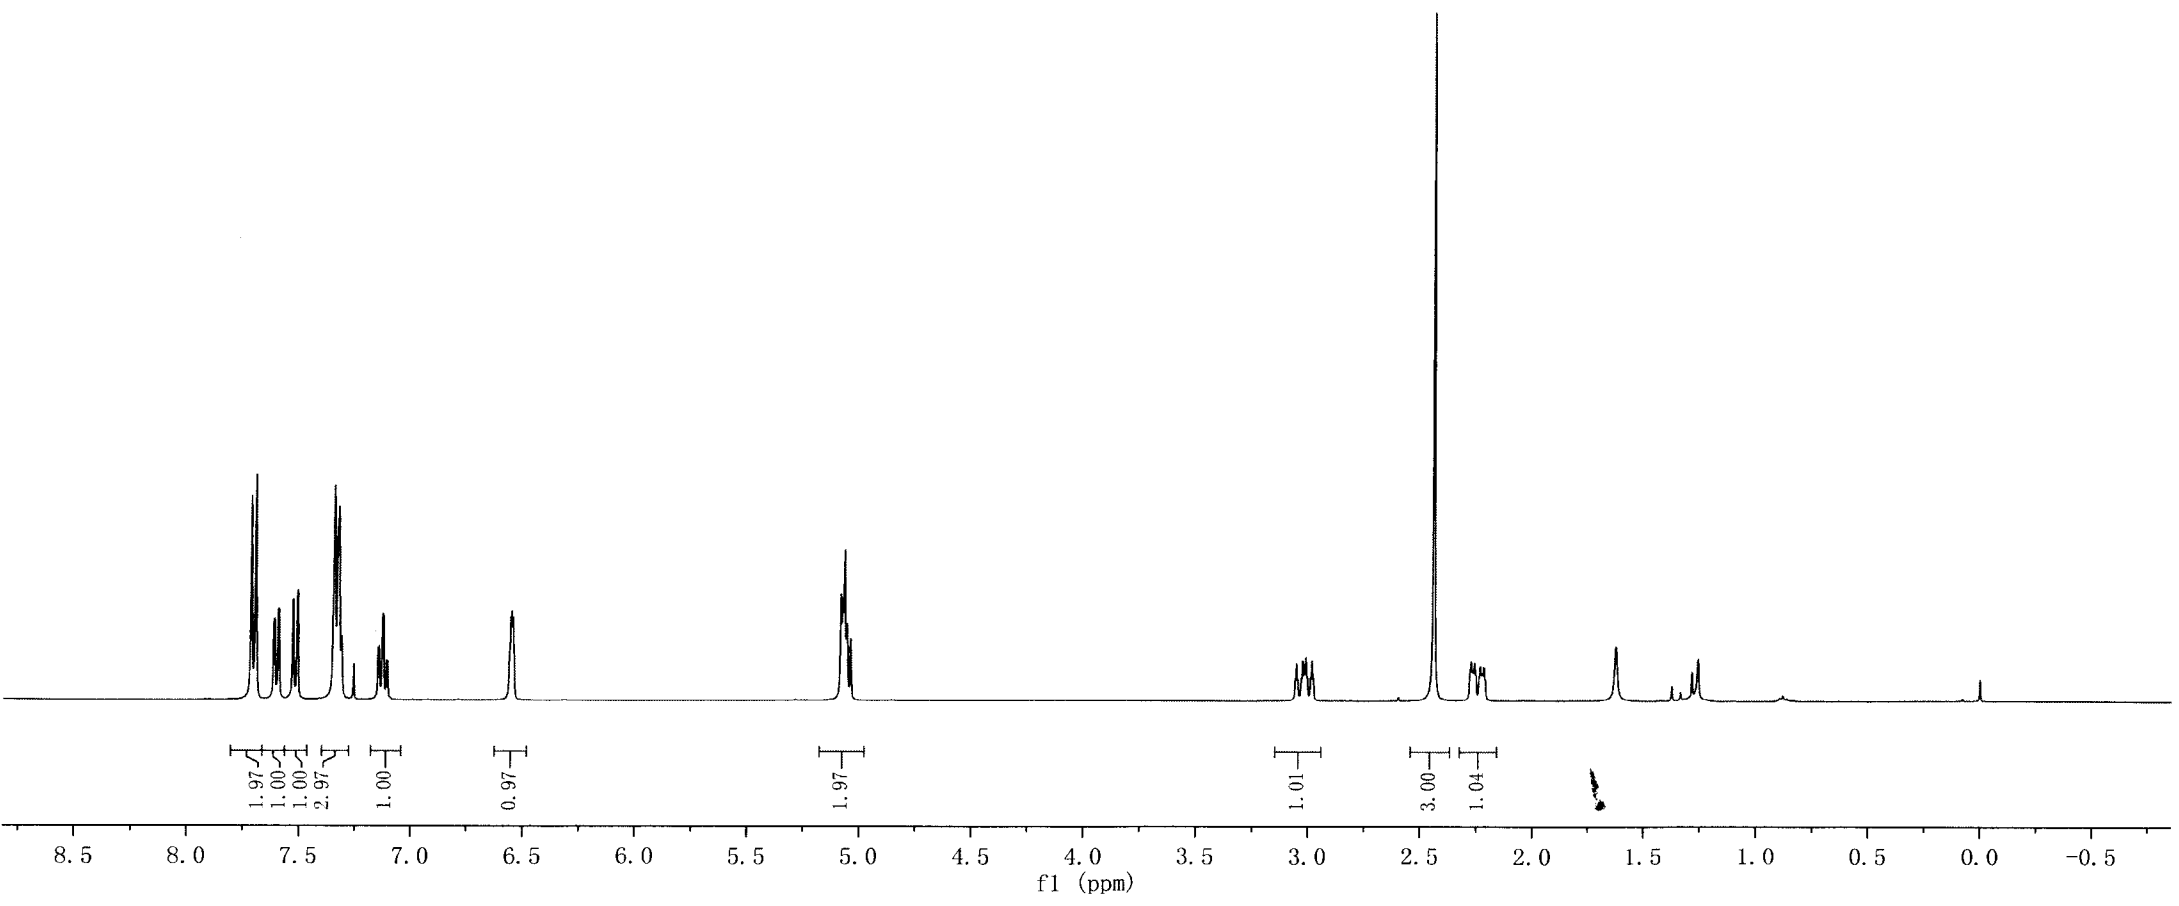

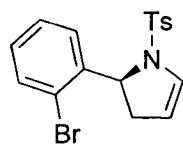

21

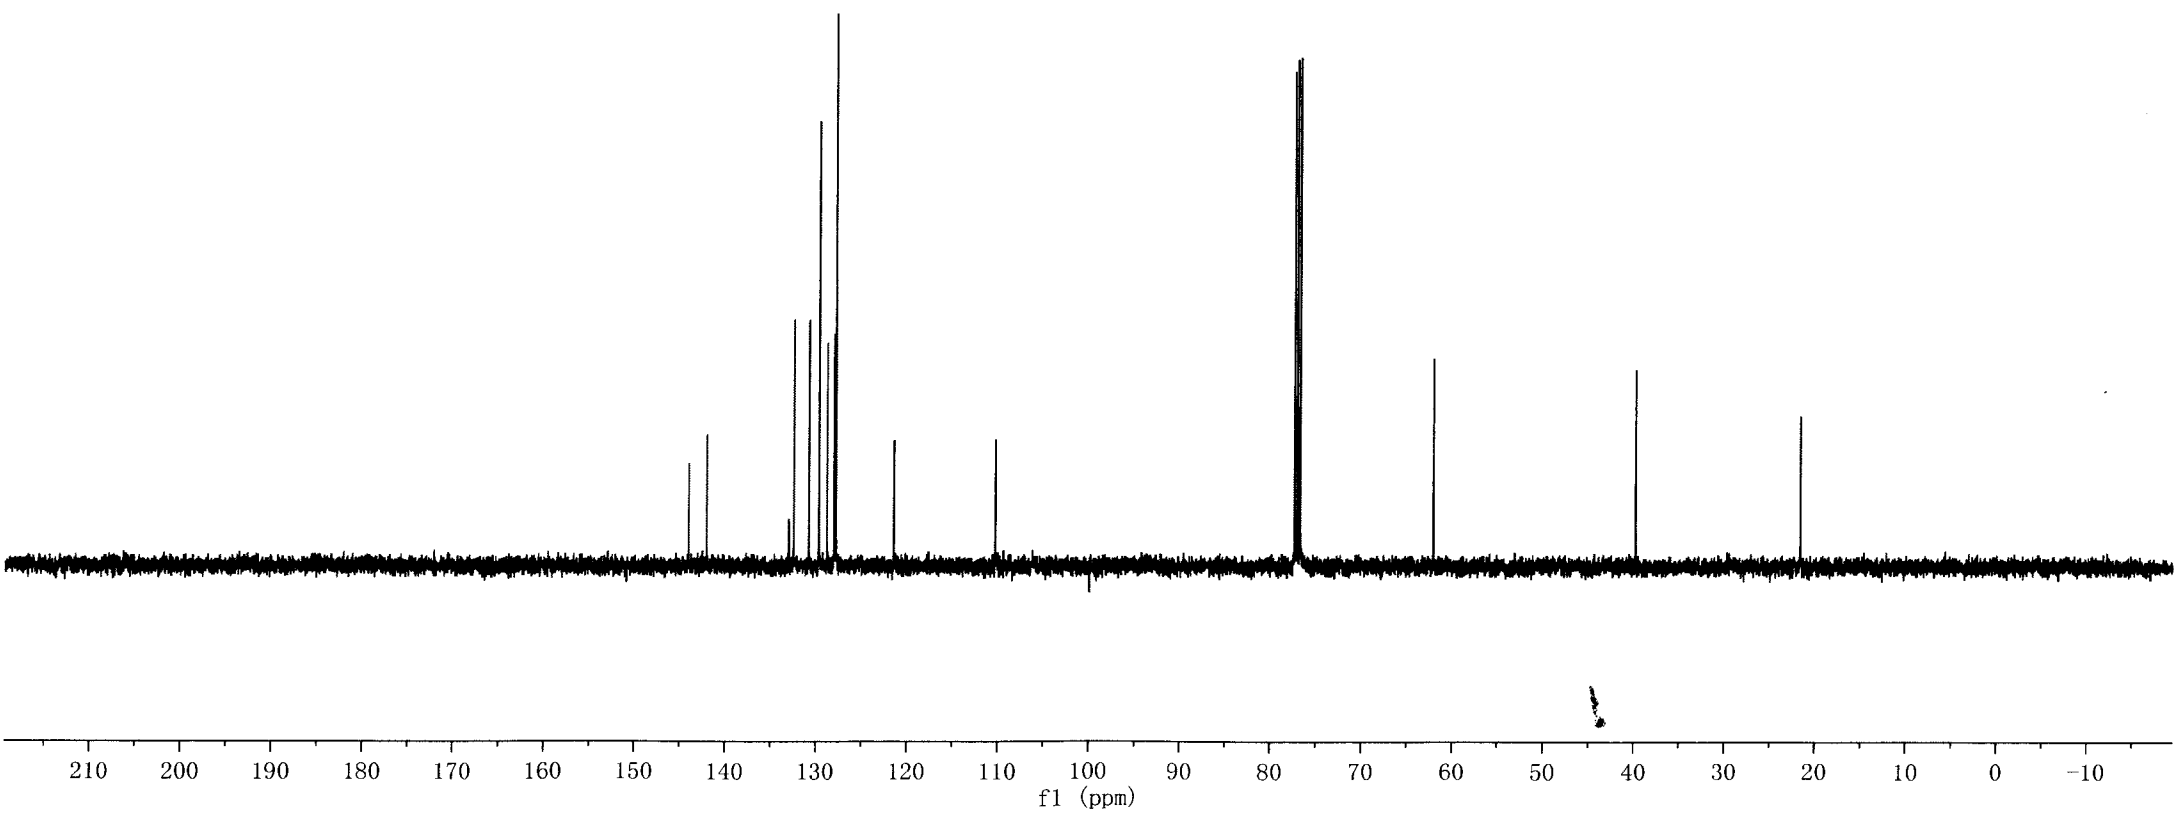

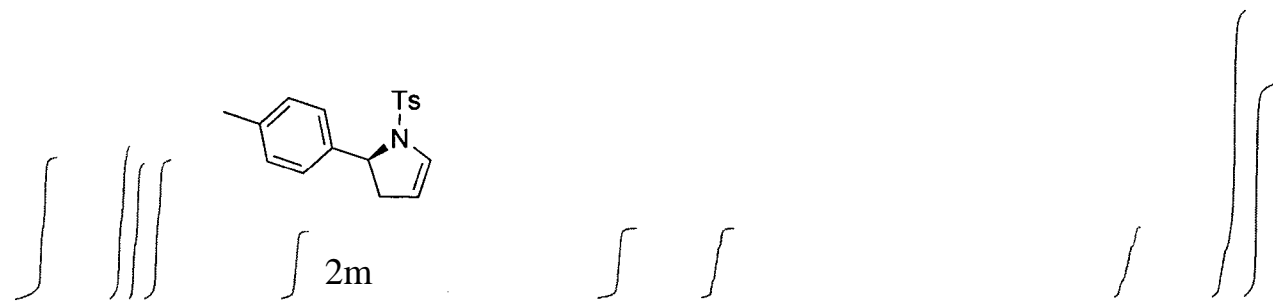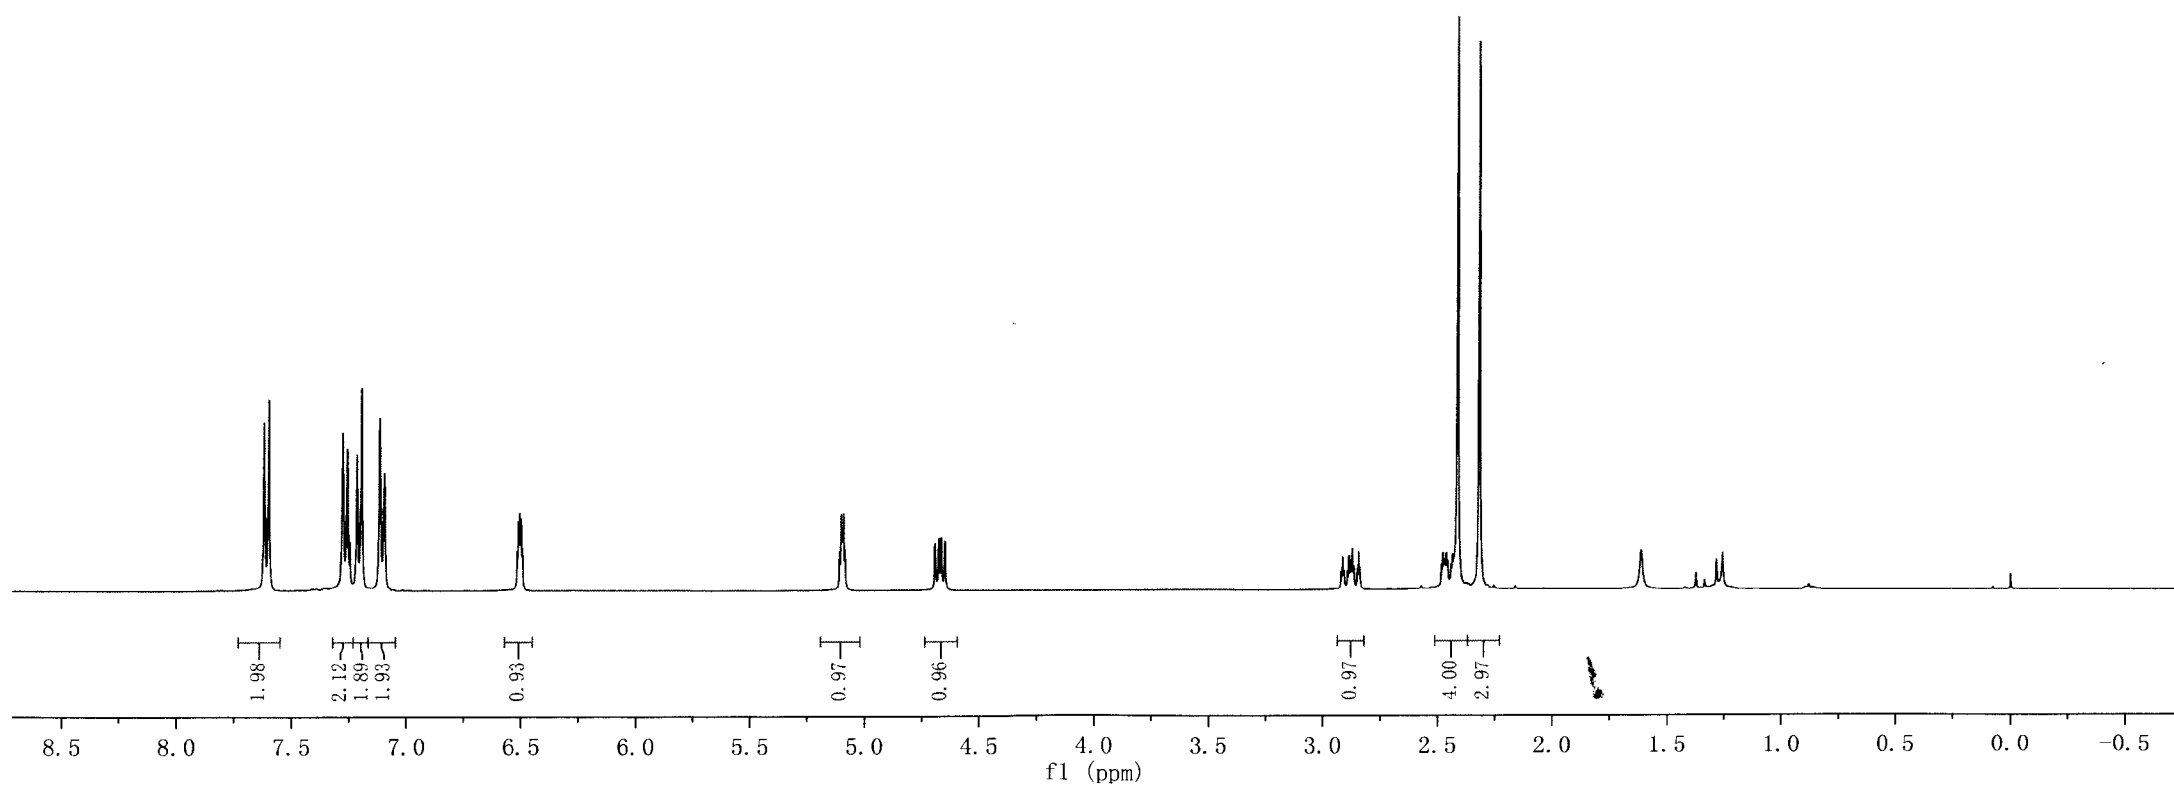

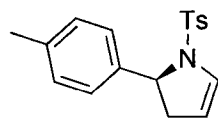

2m

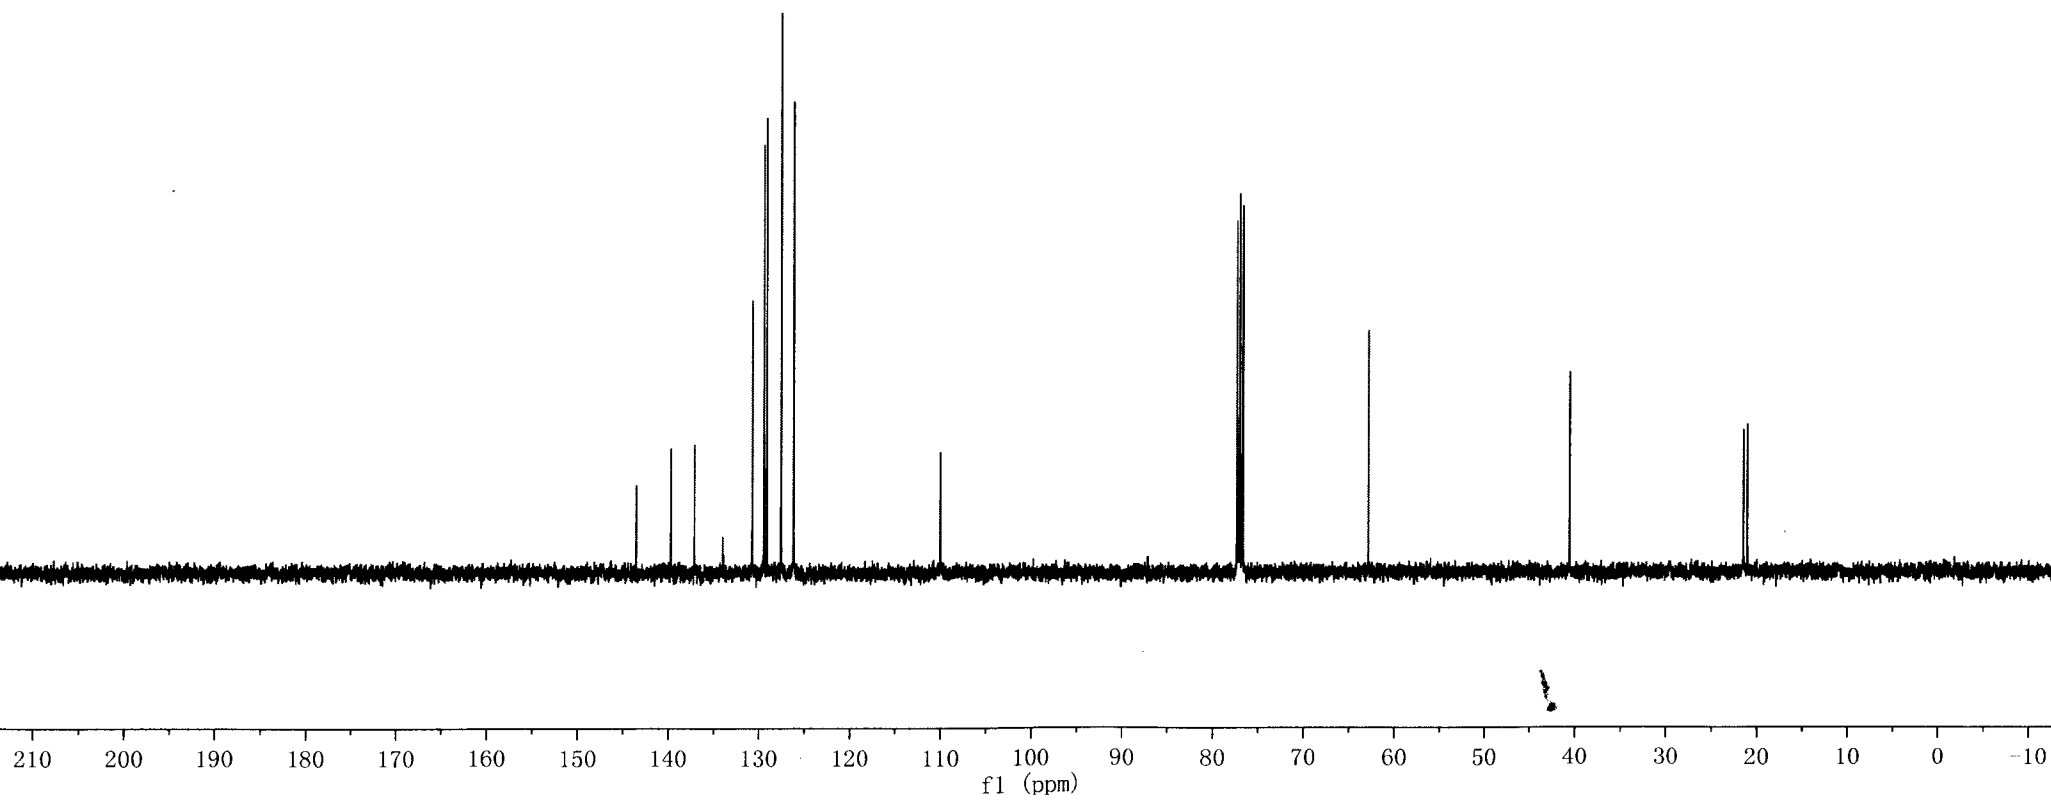

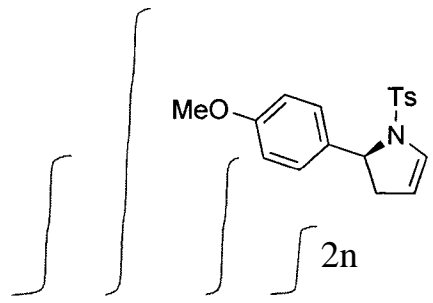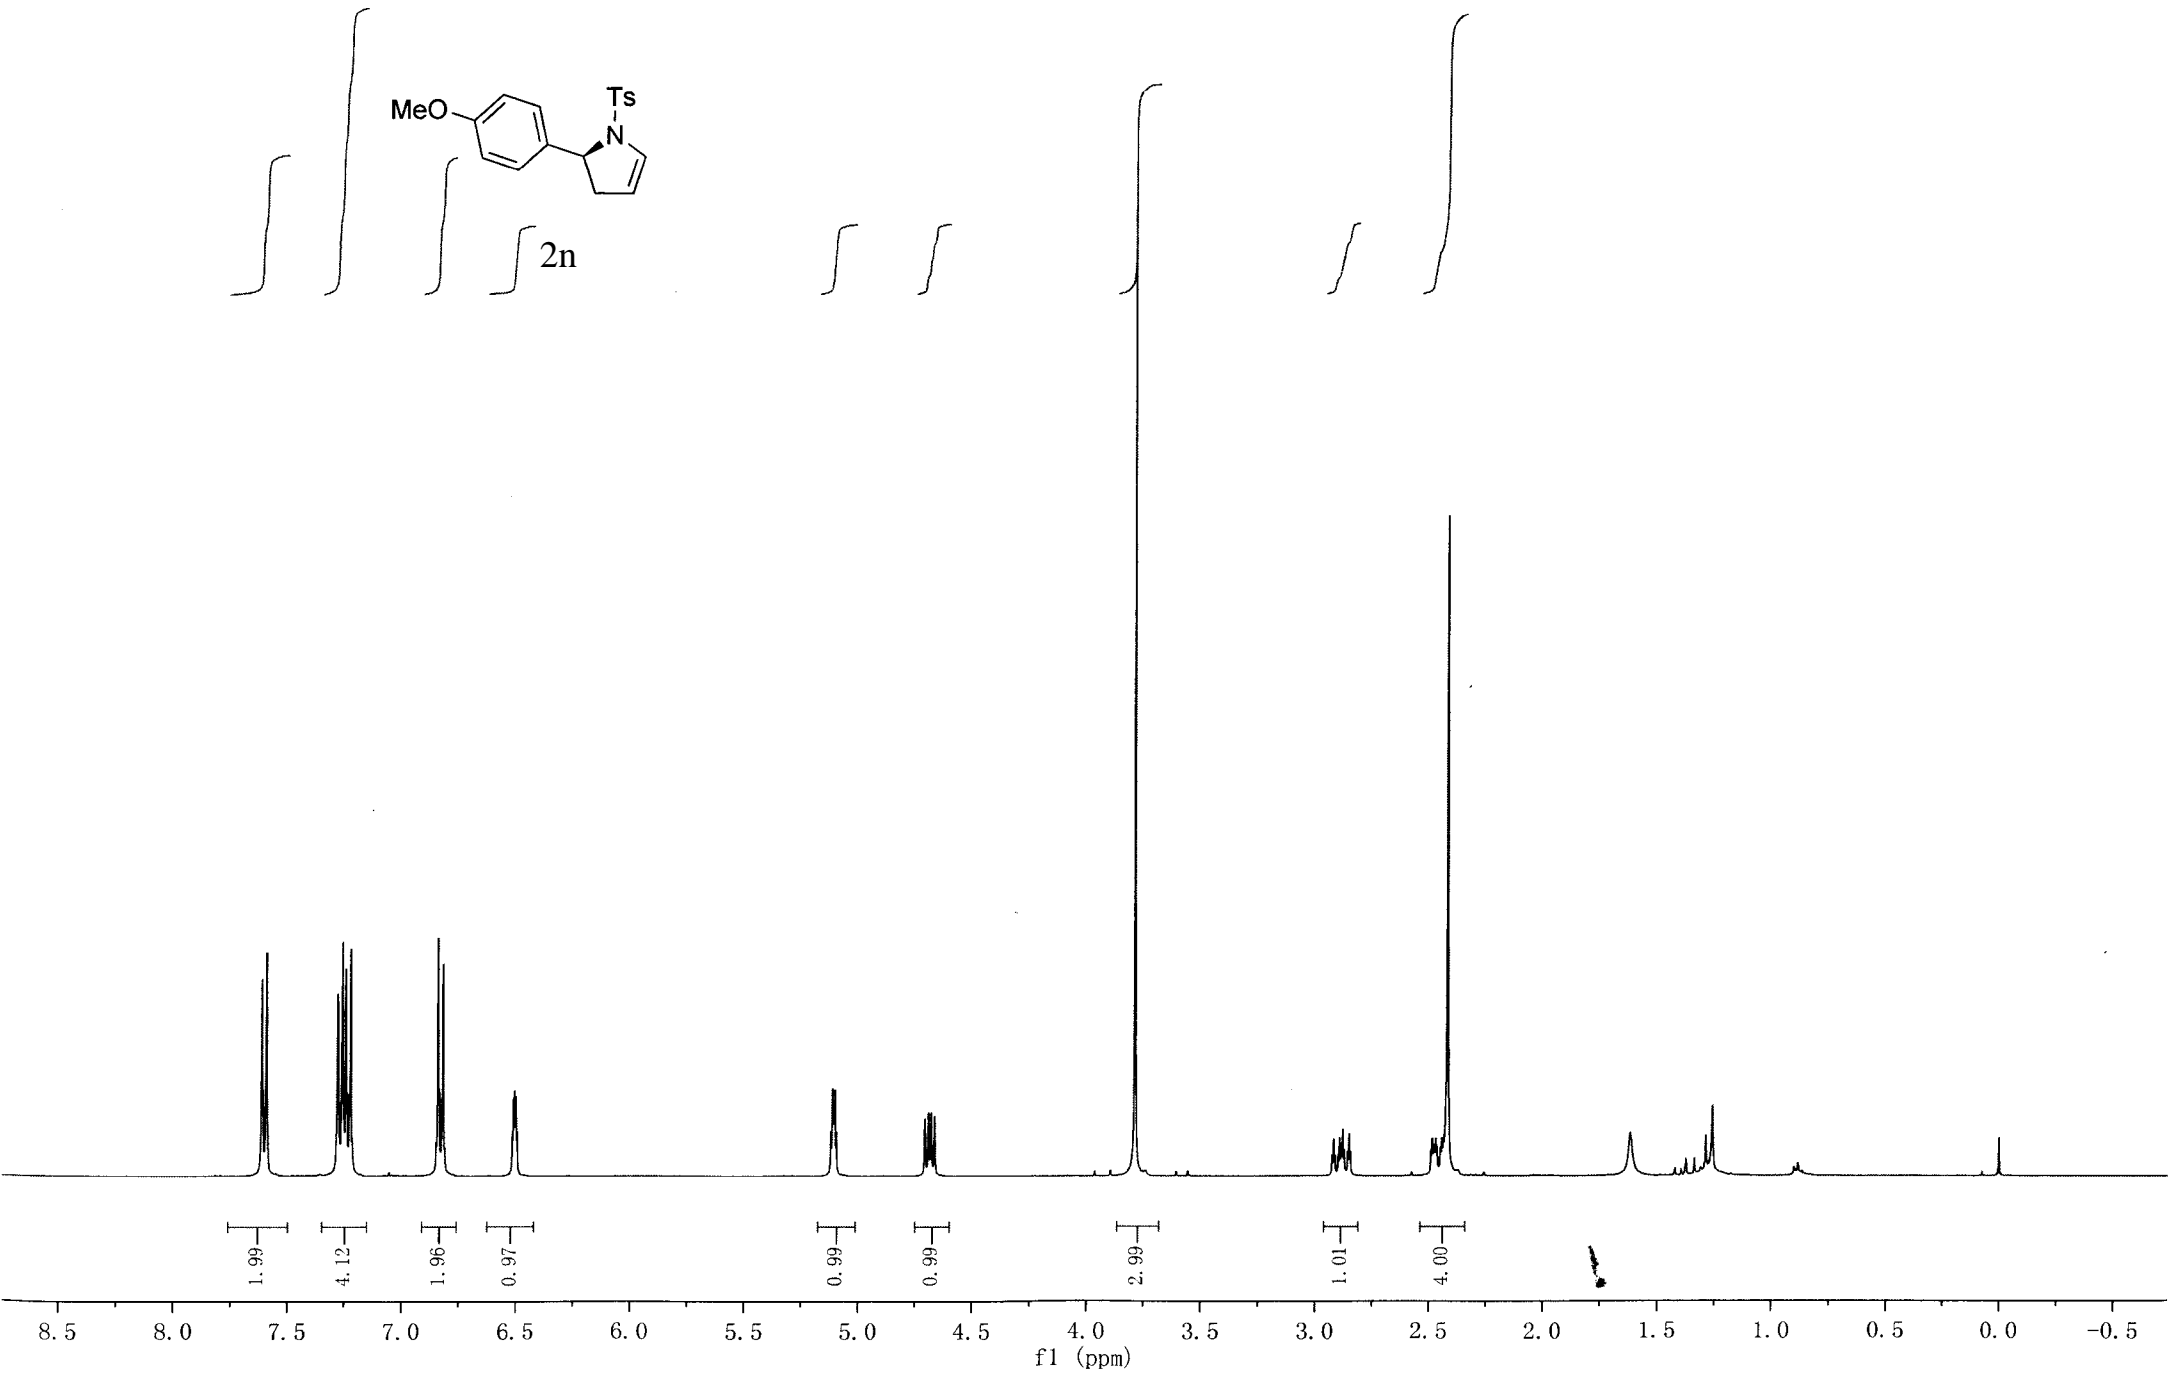

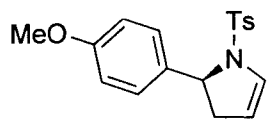

2n

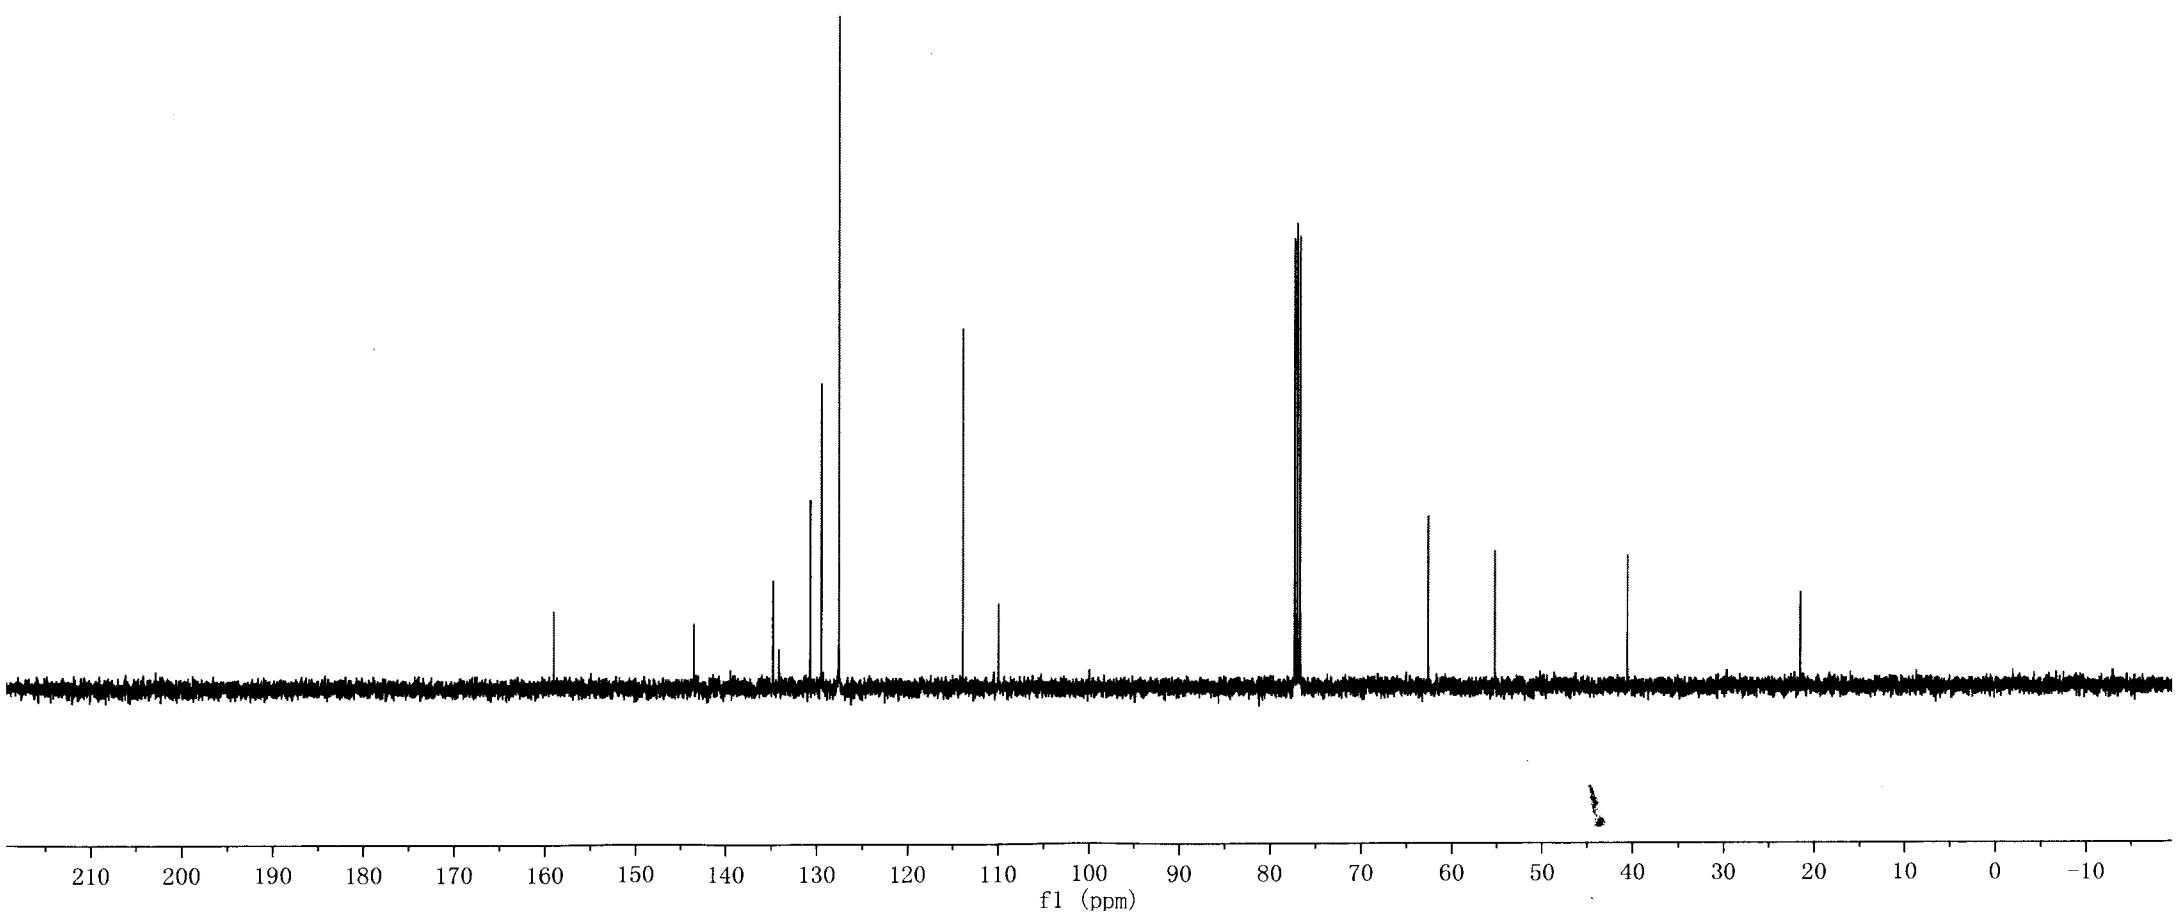

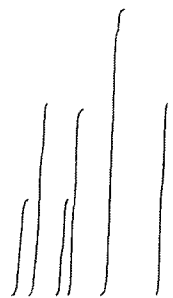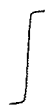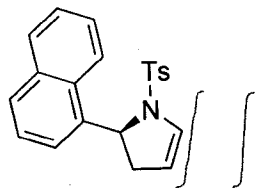

2o

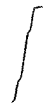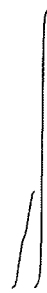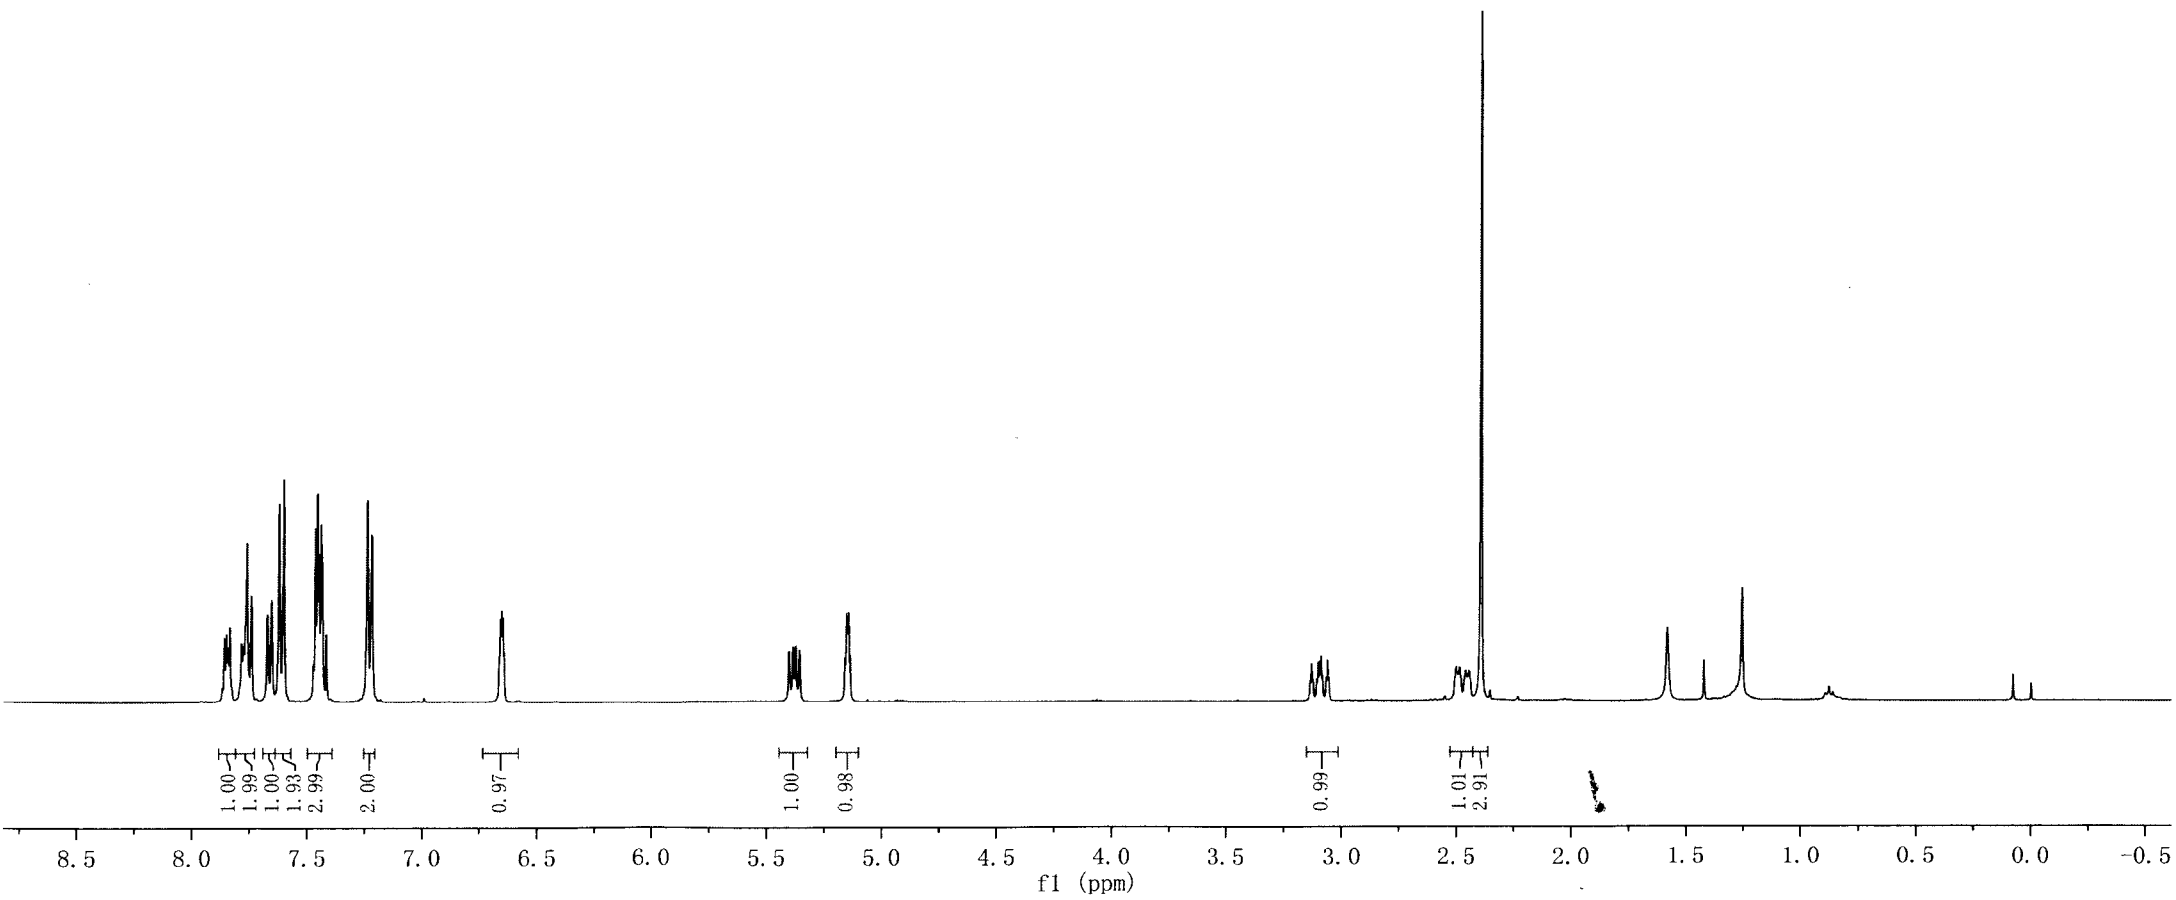



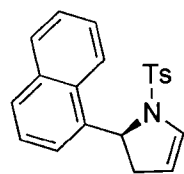

2o

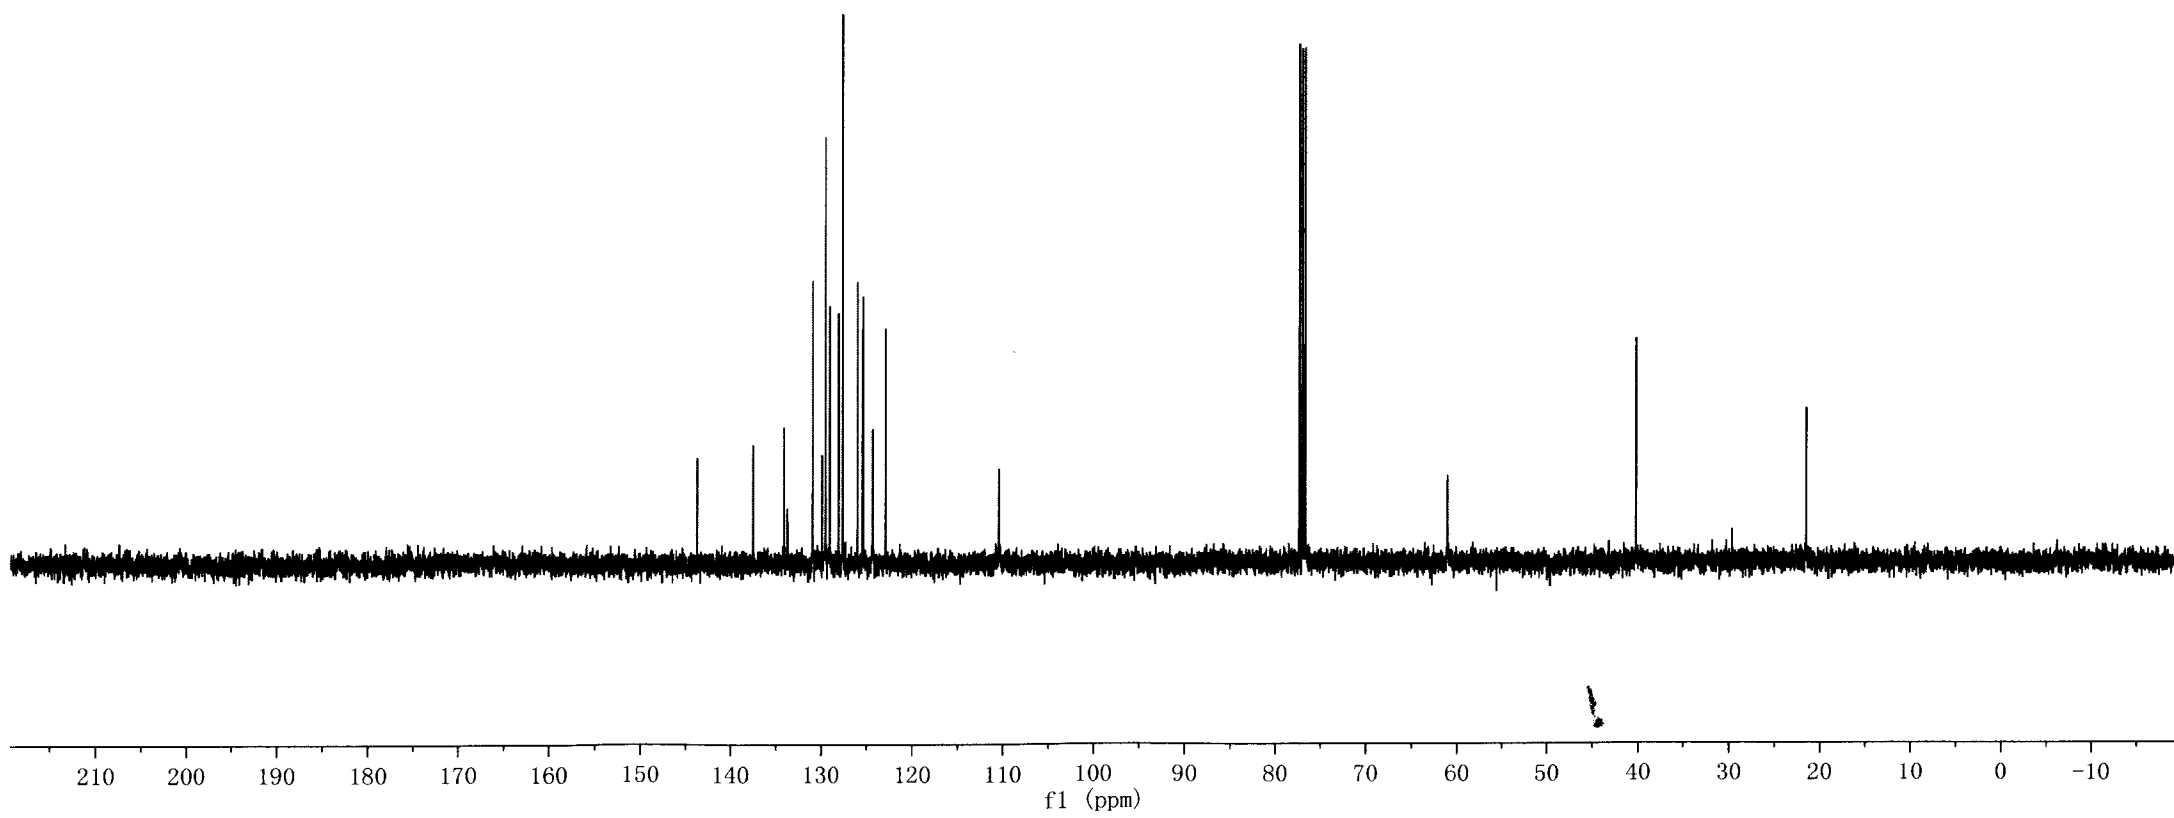

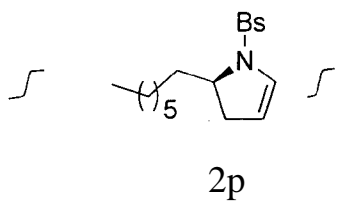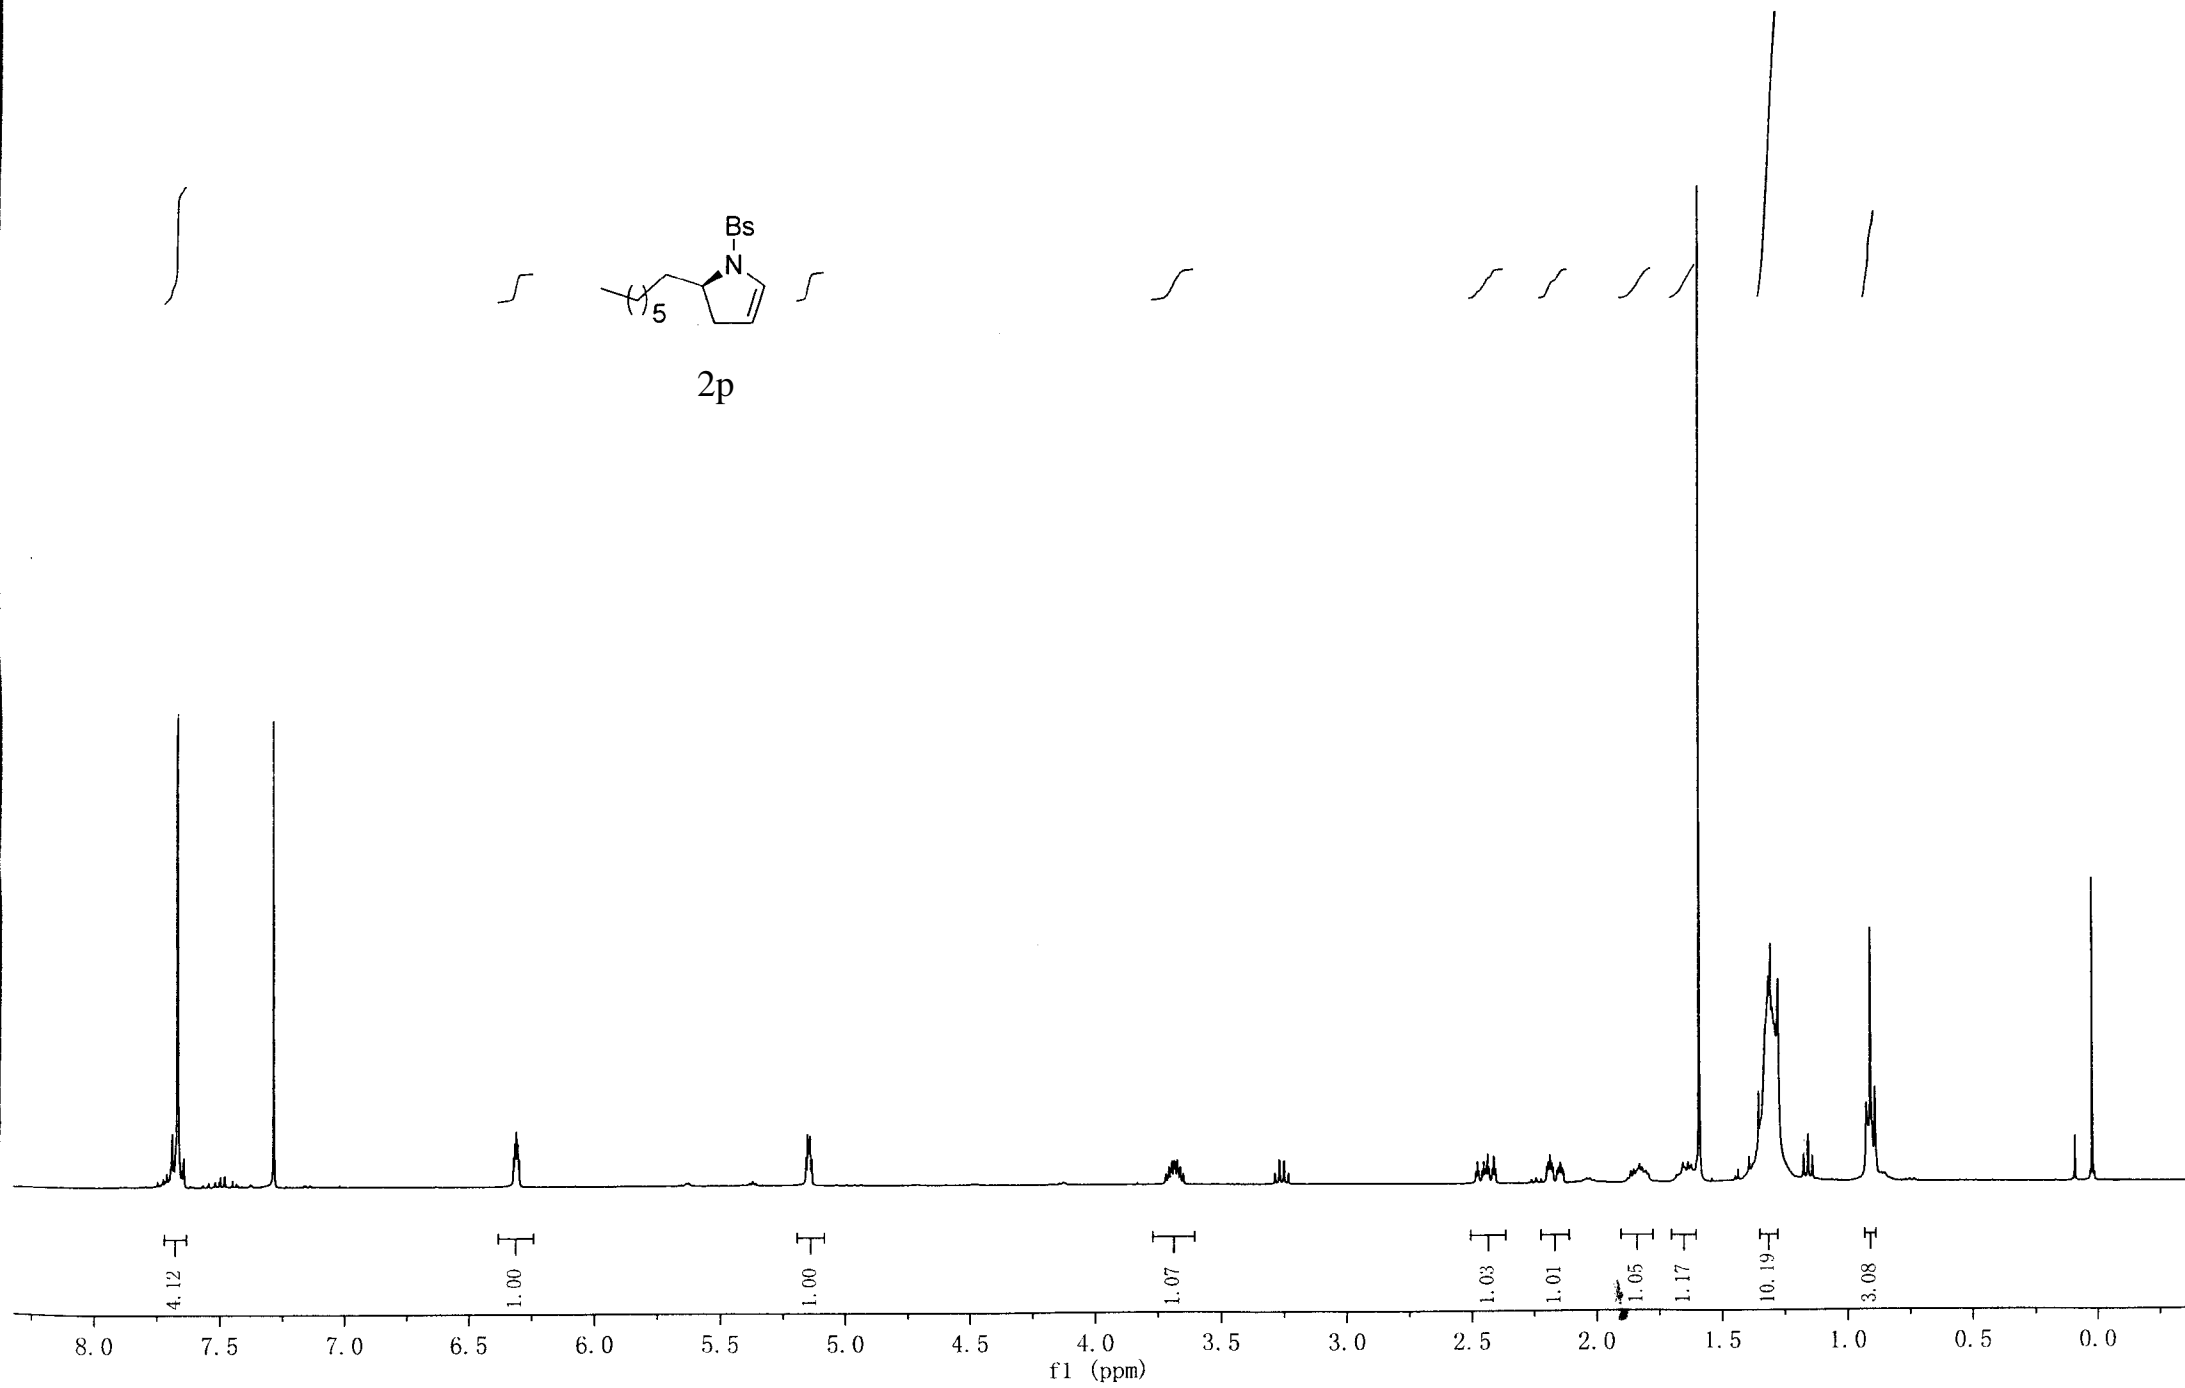

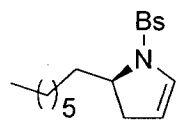

2p

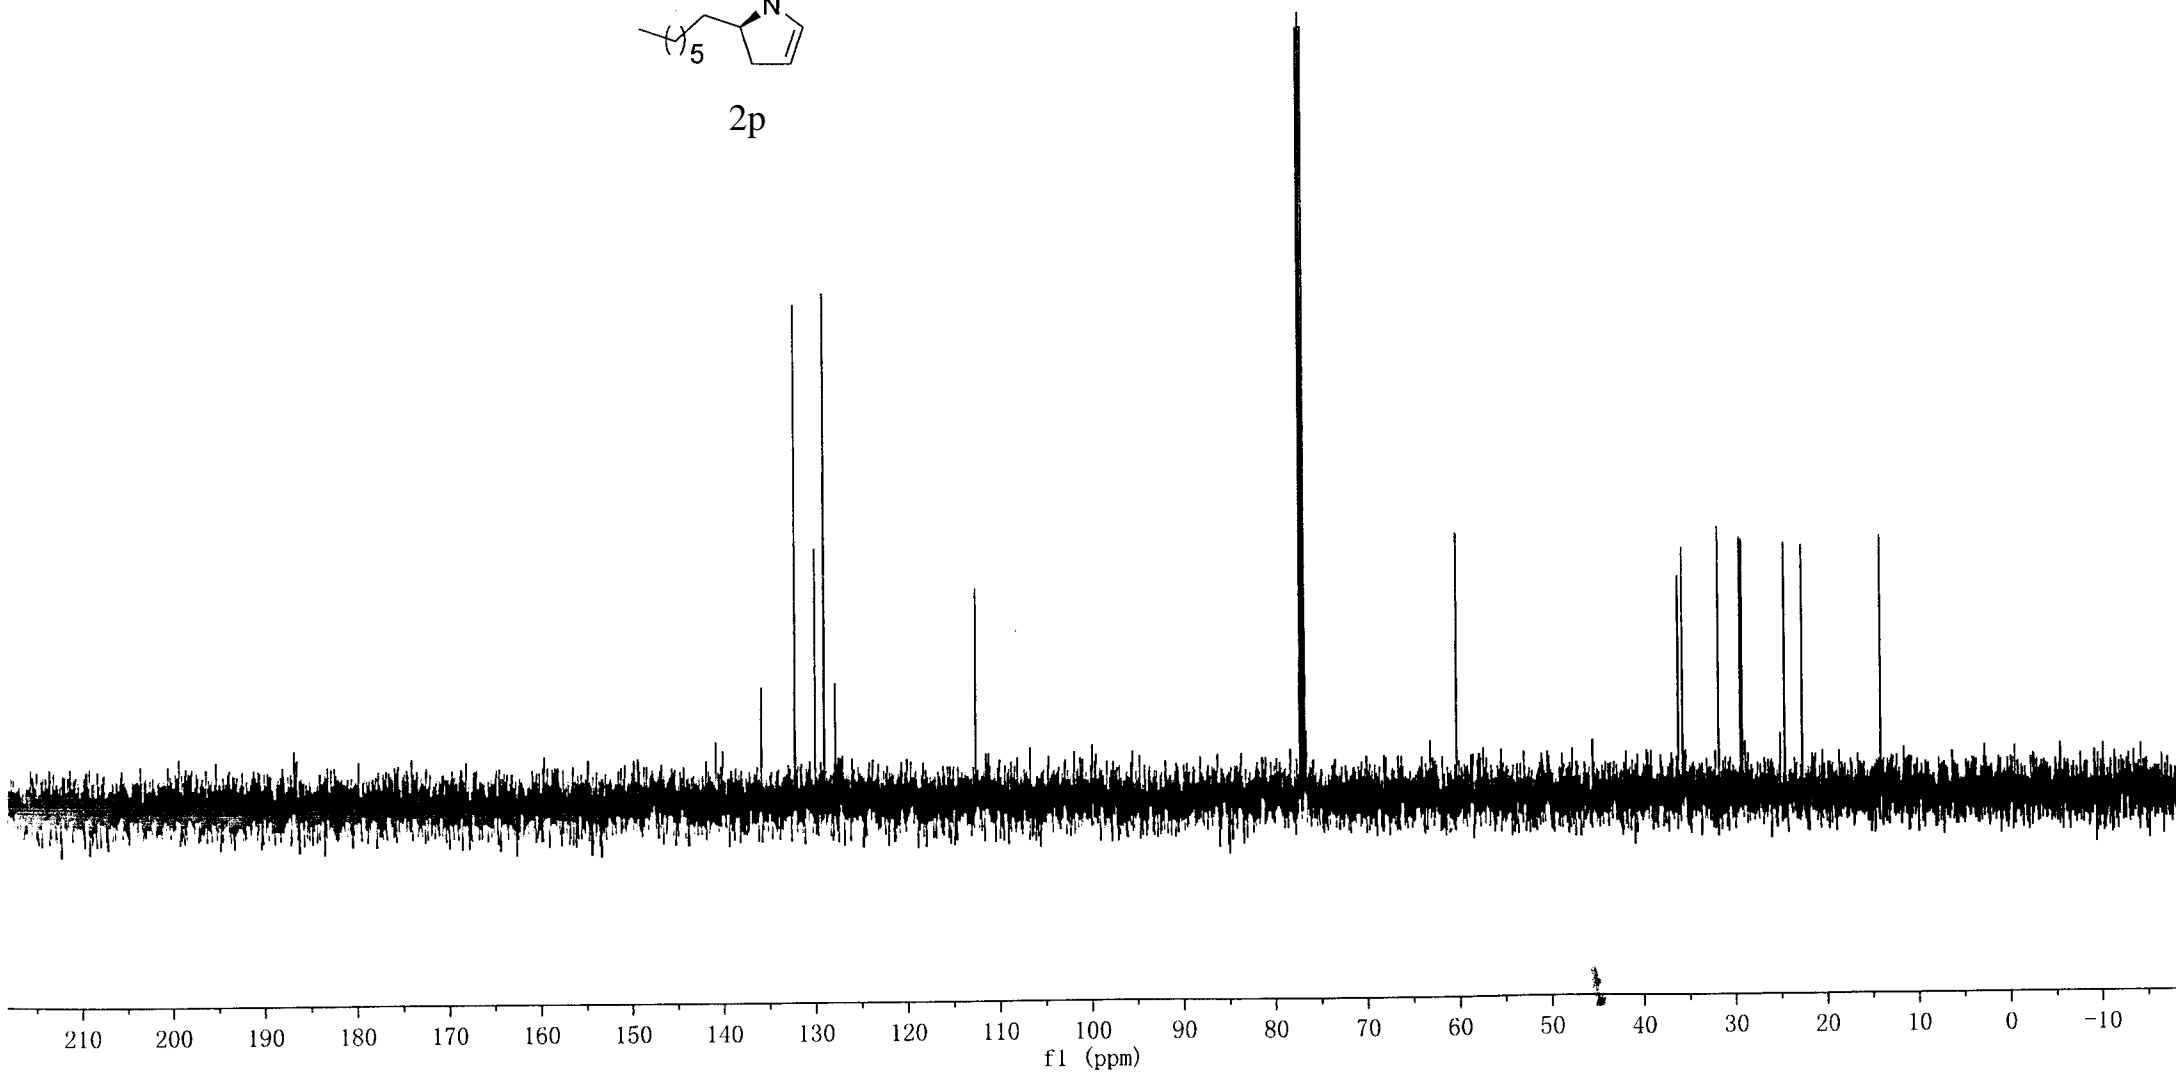

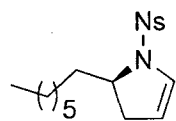

2q

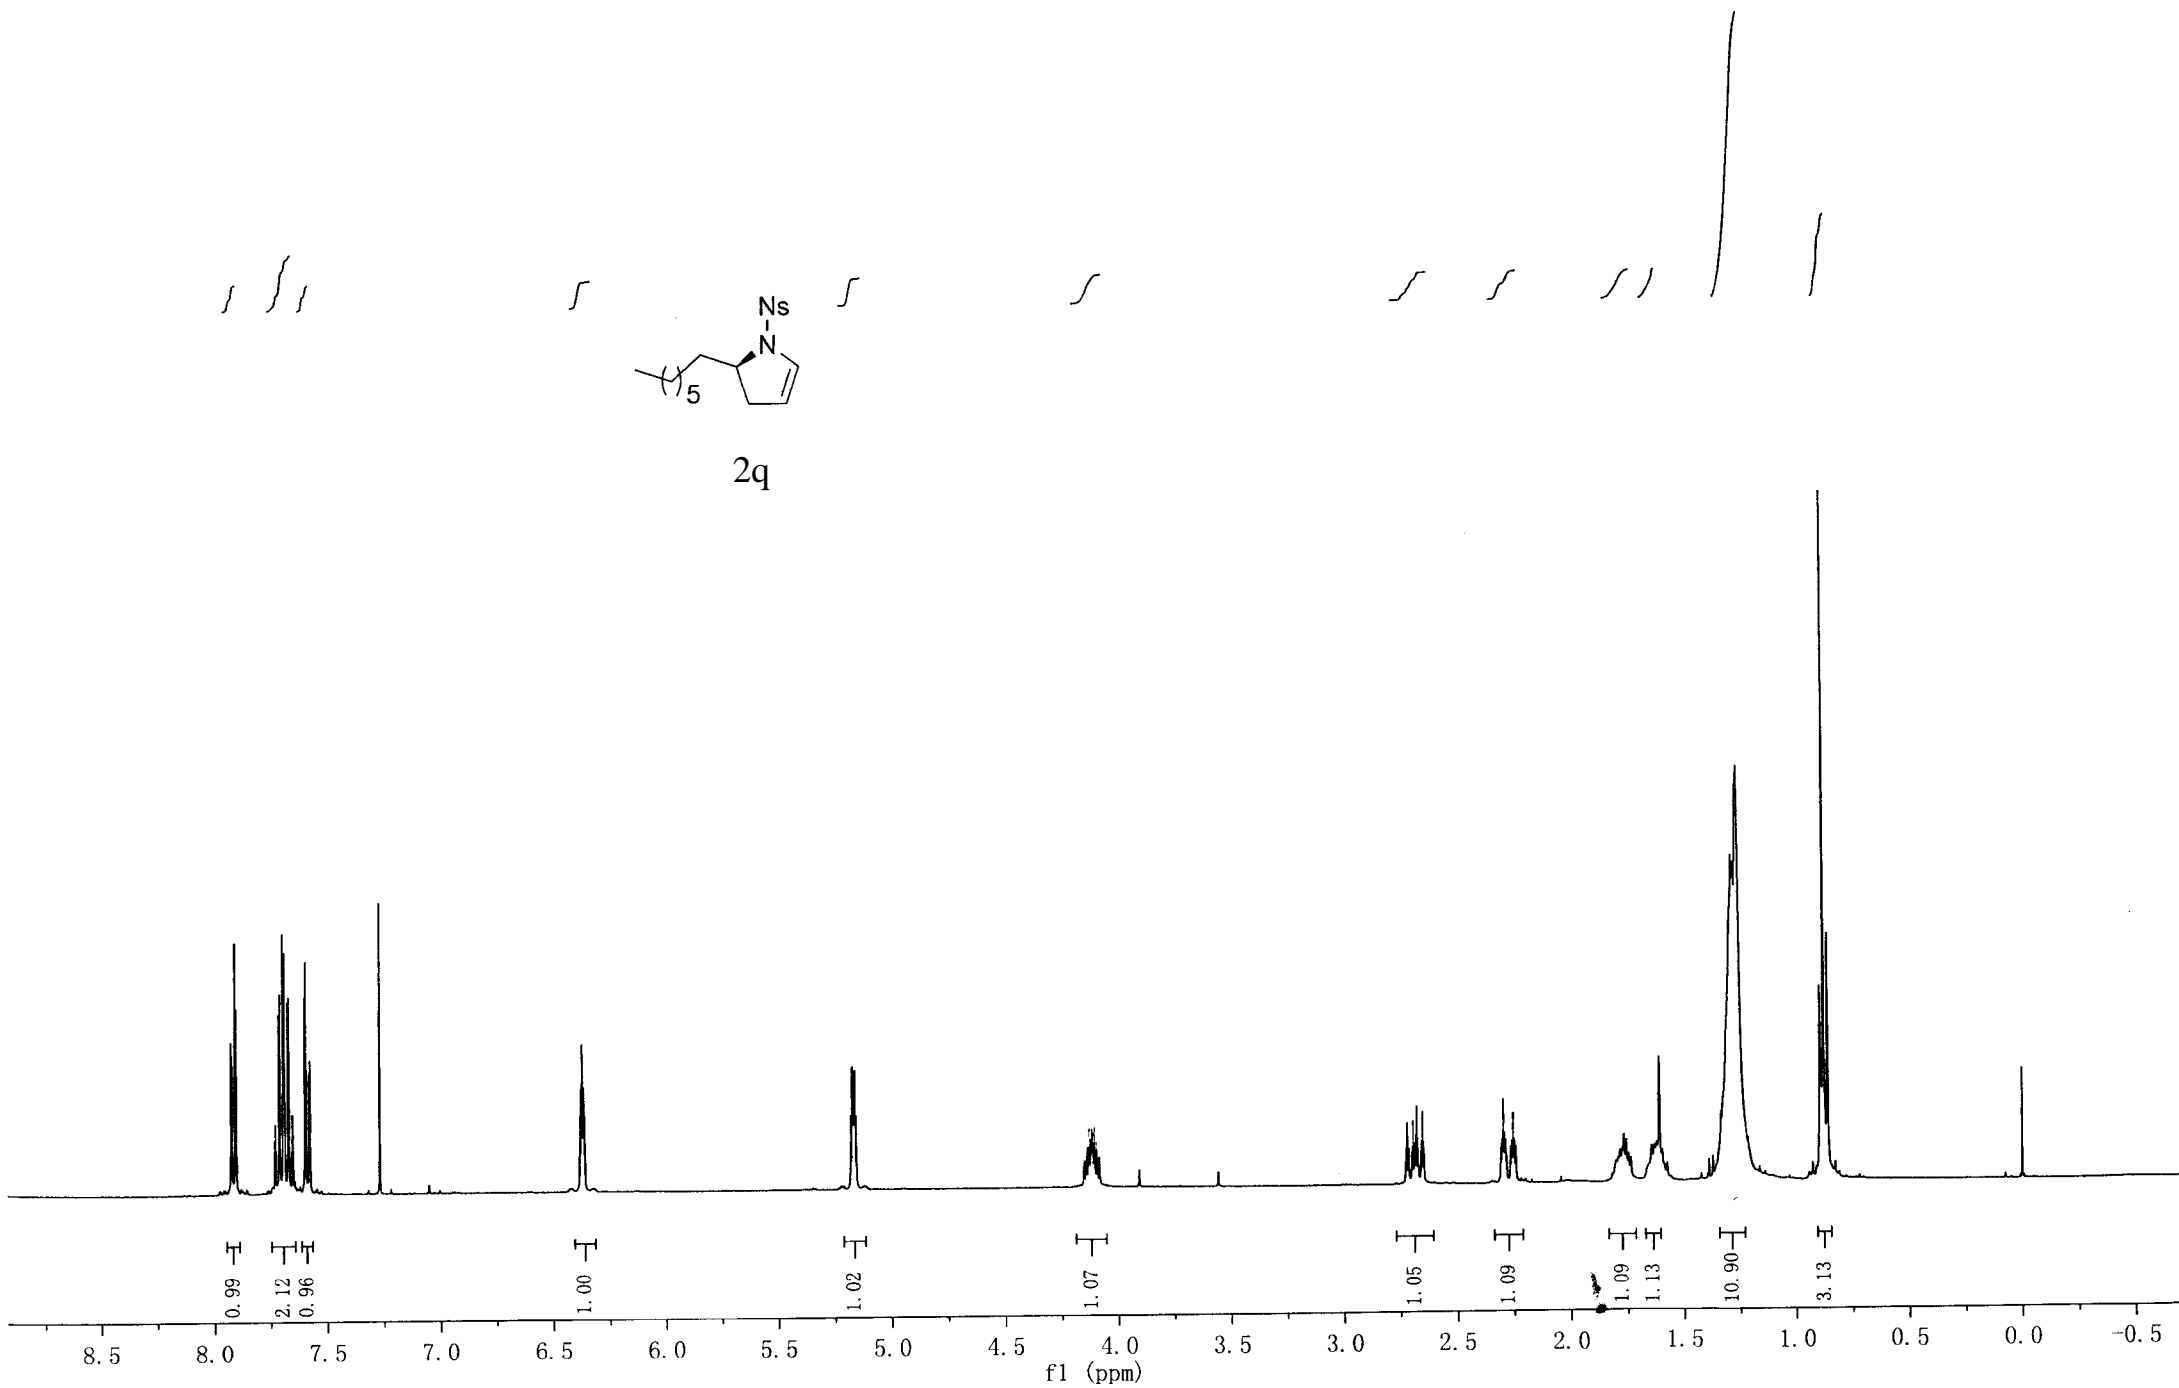

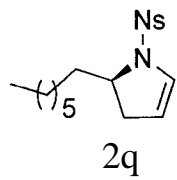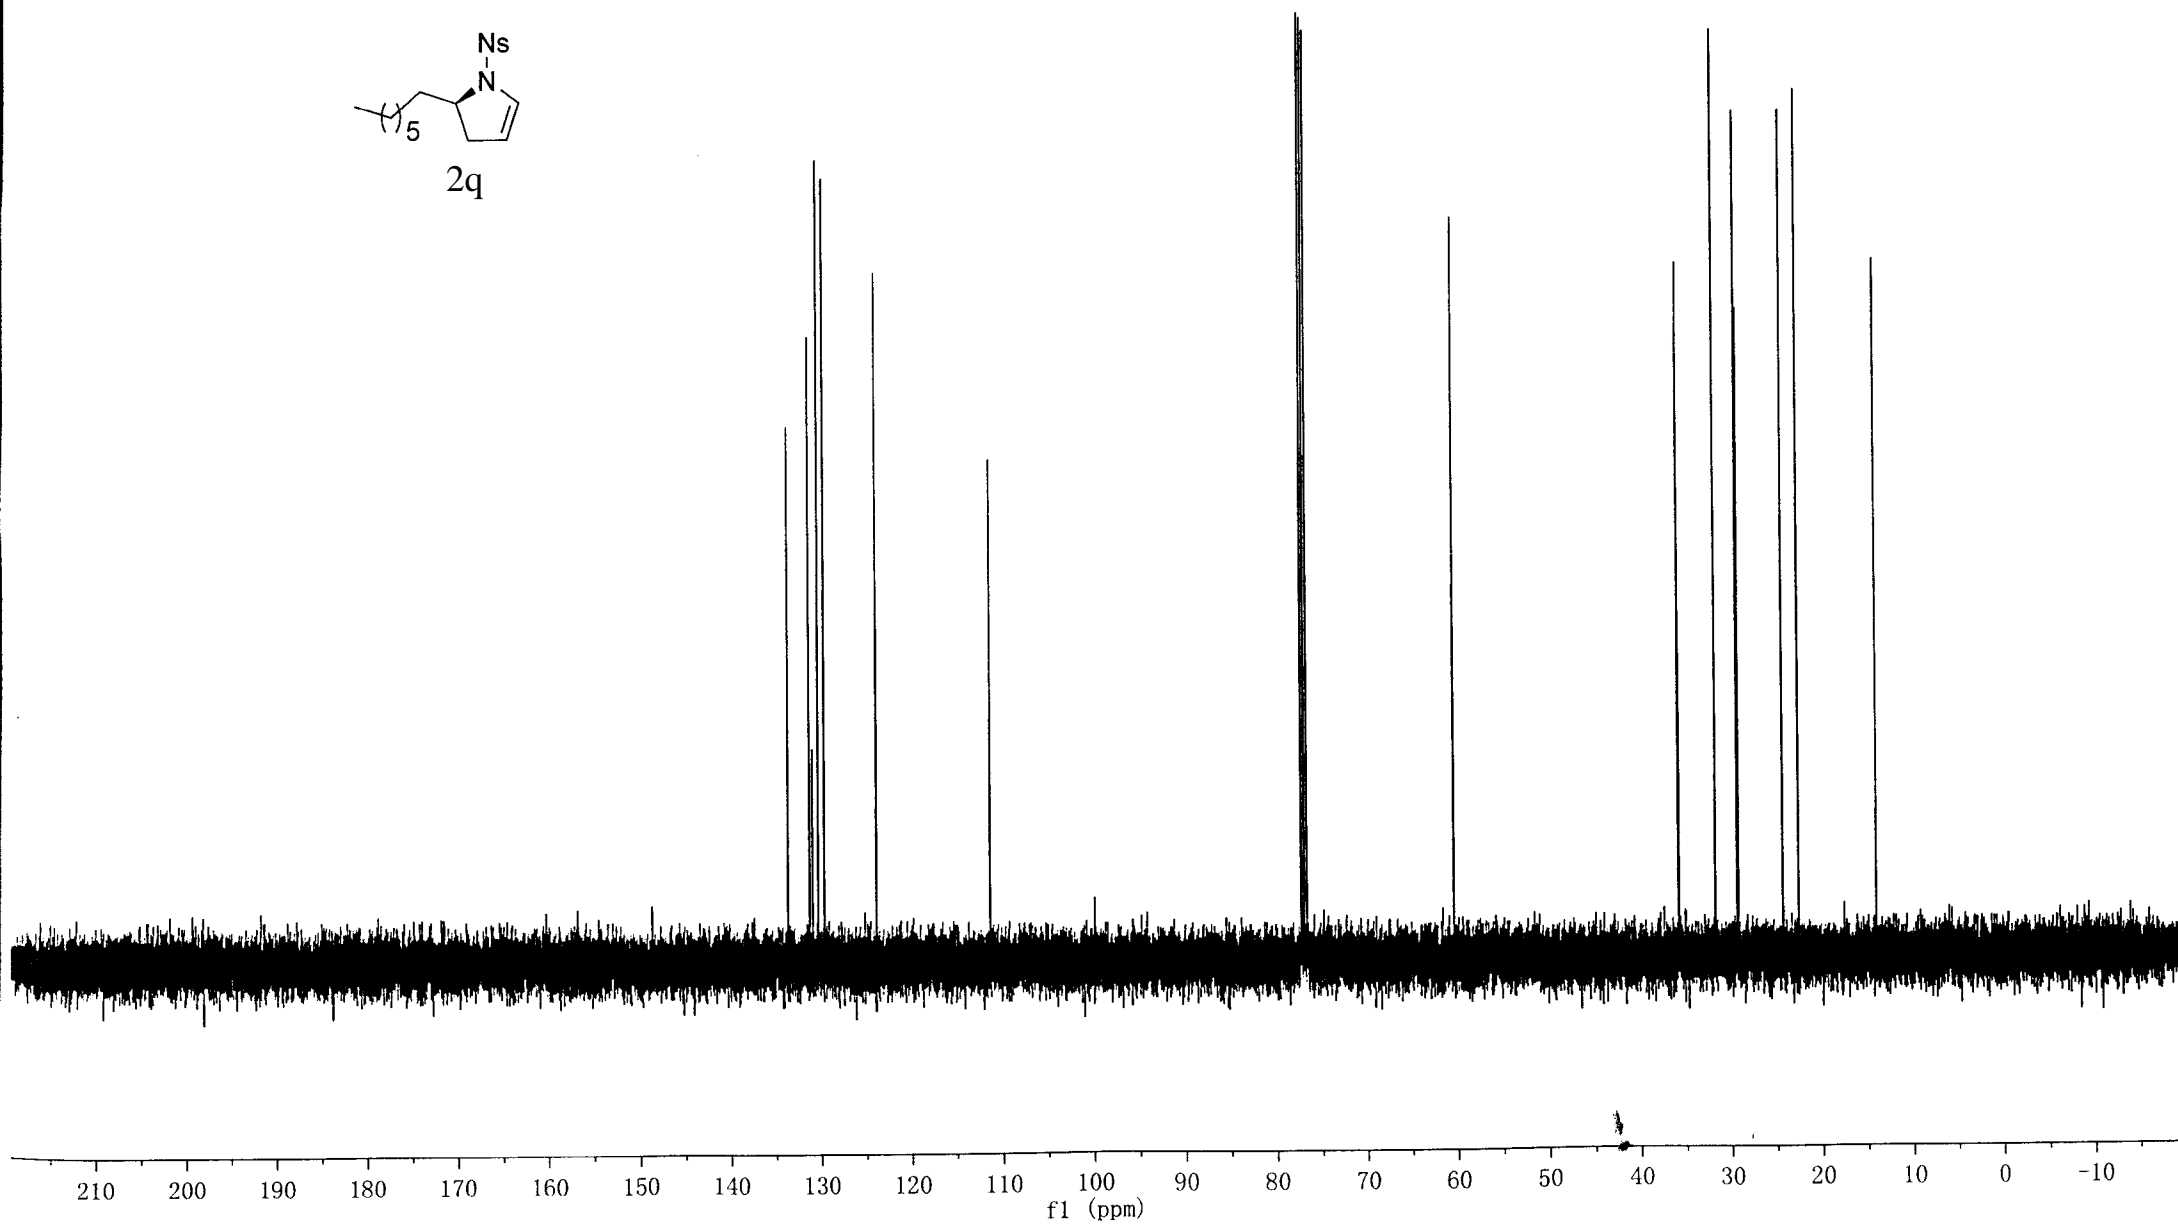

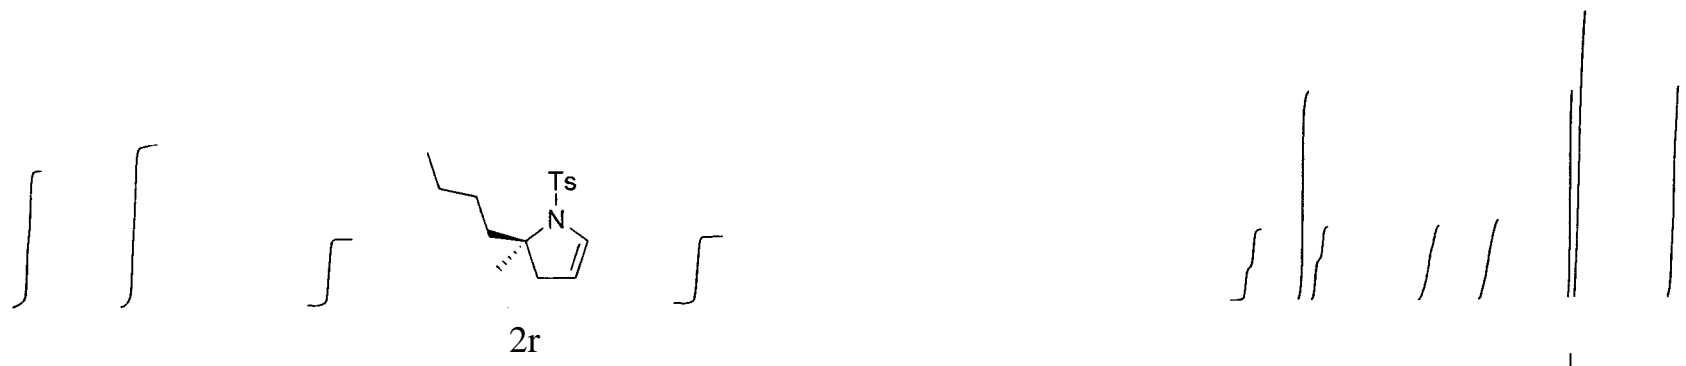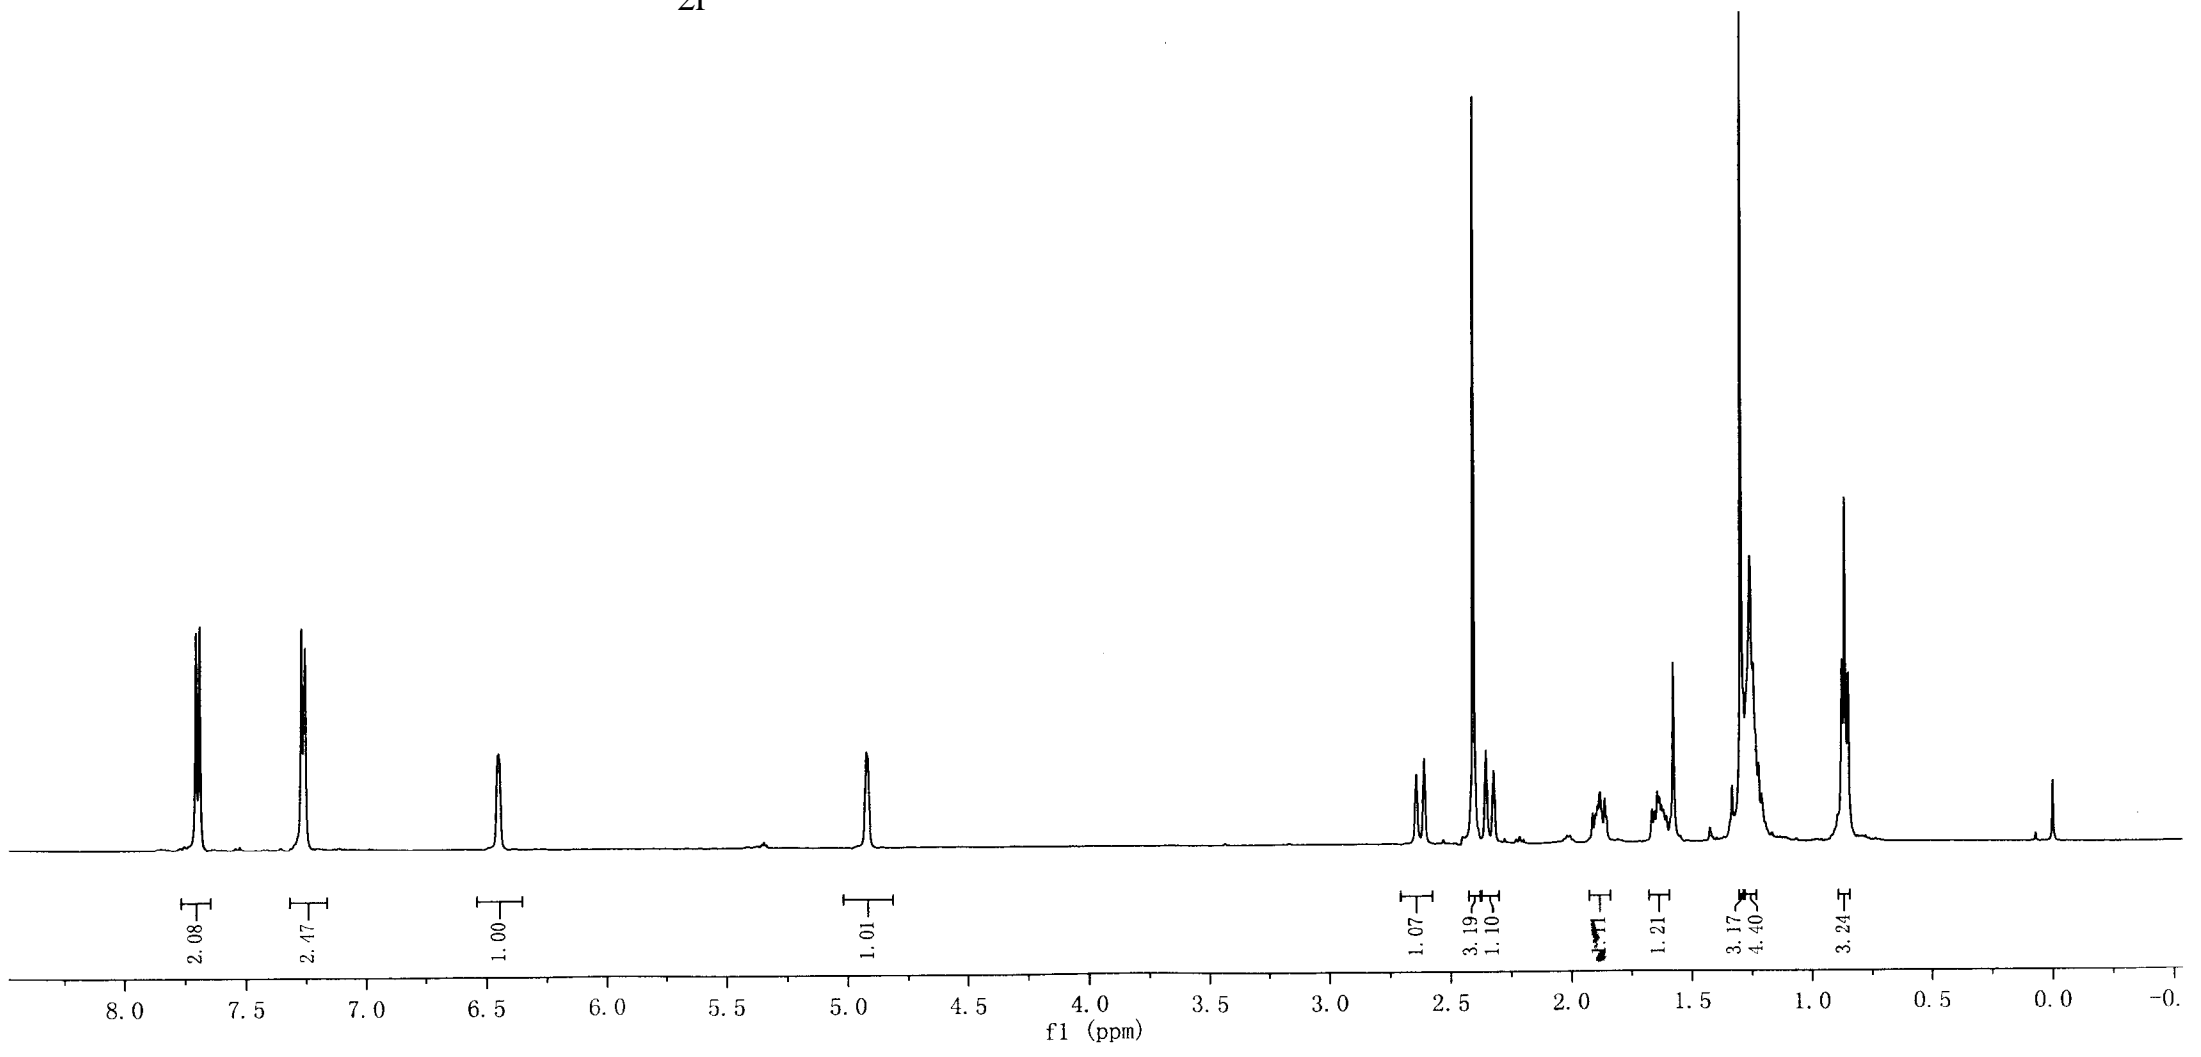

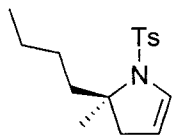

2r

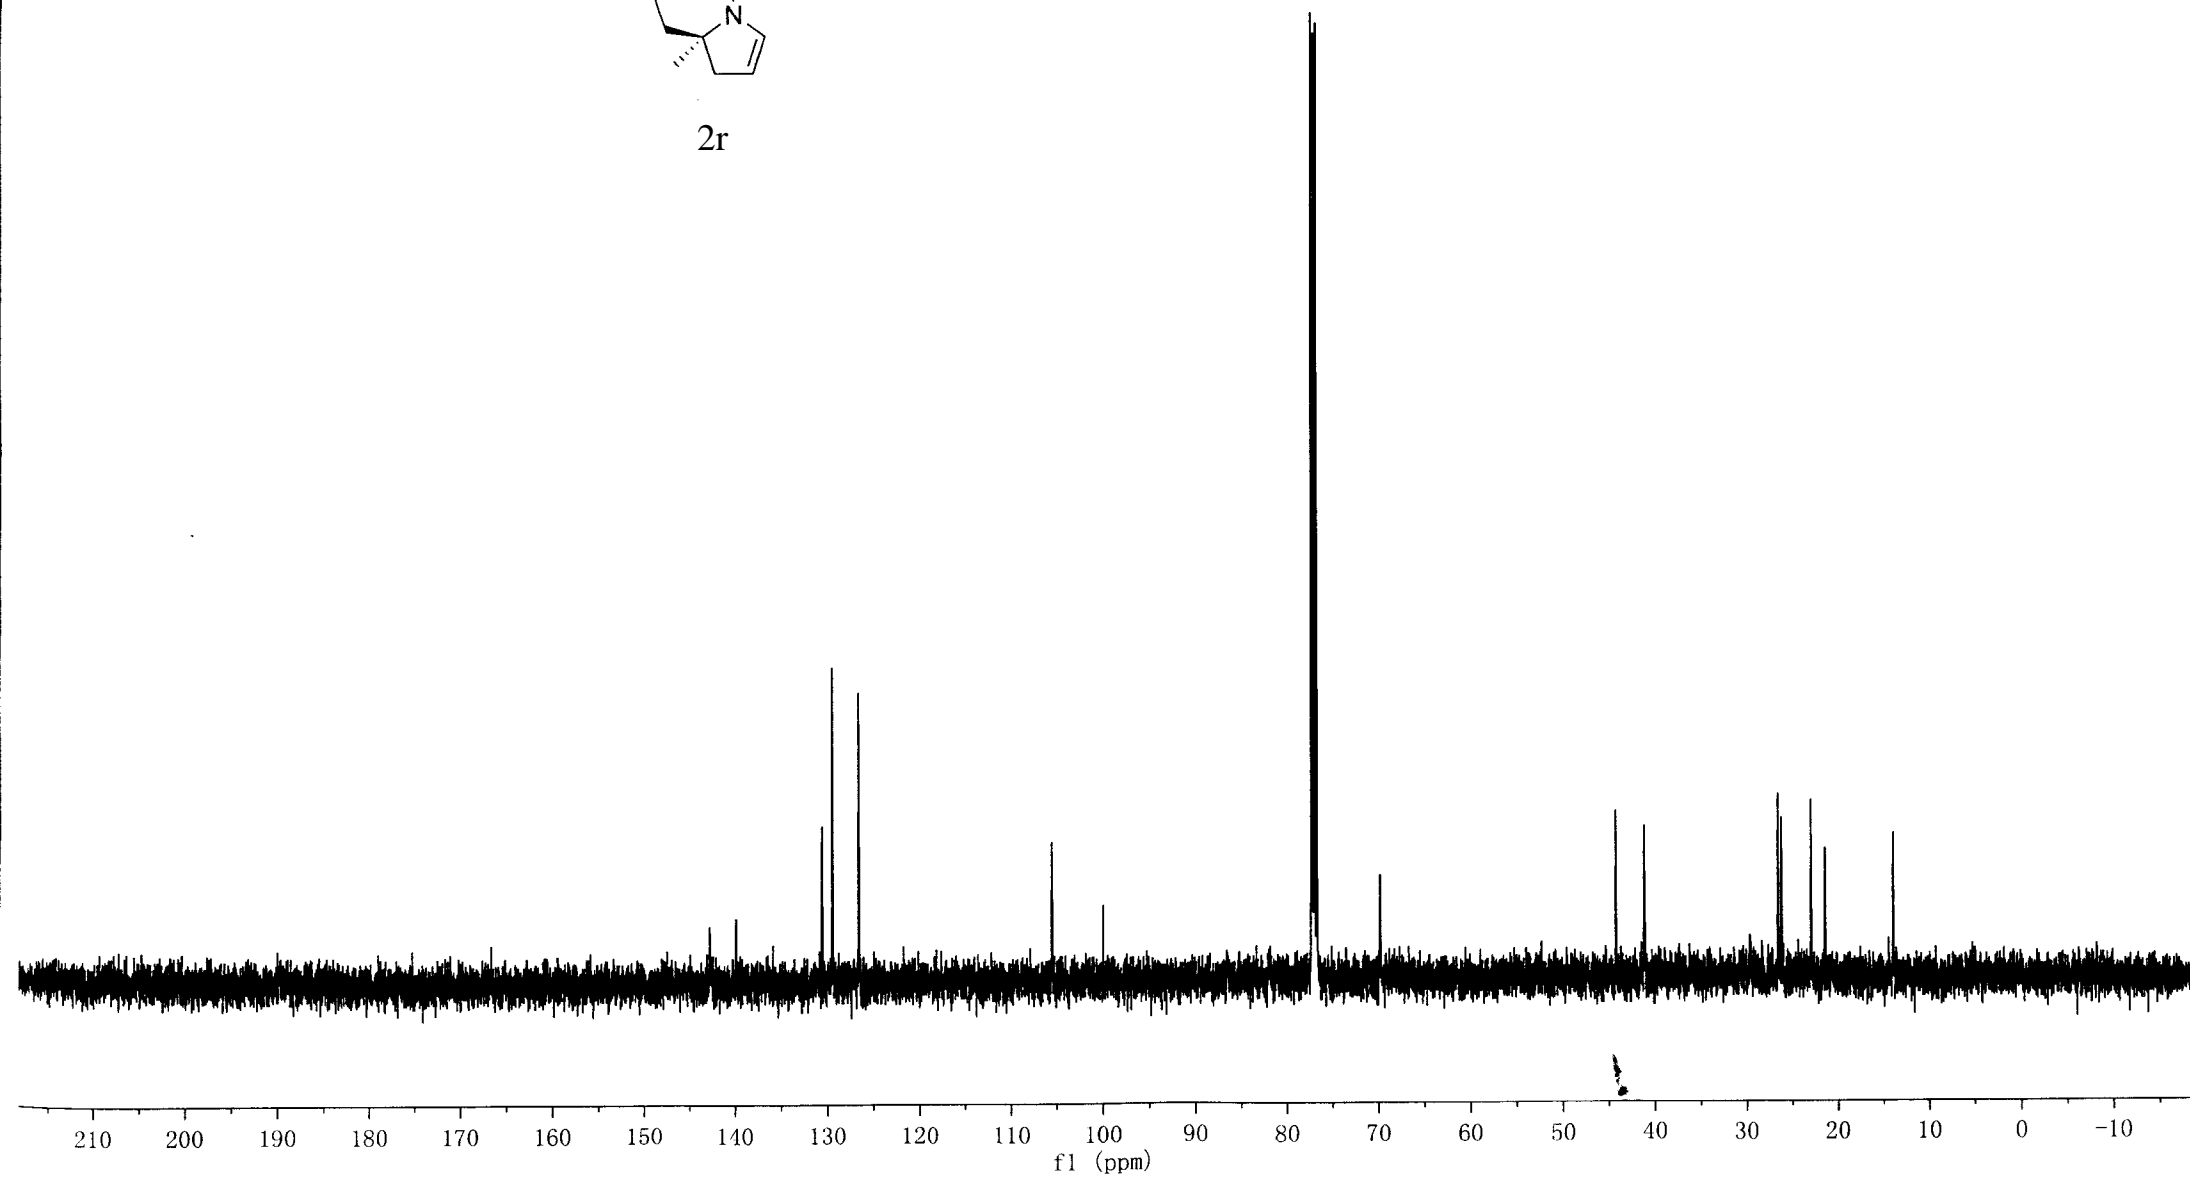

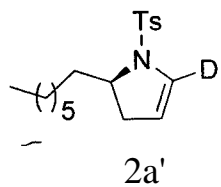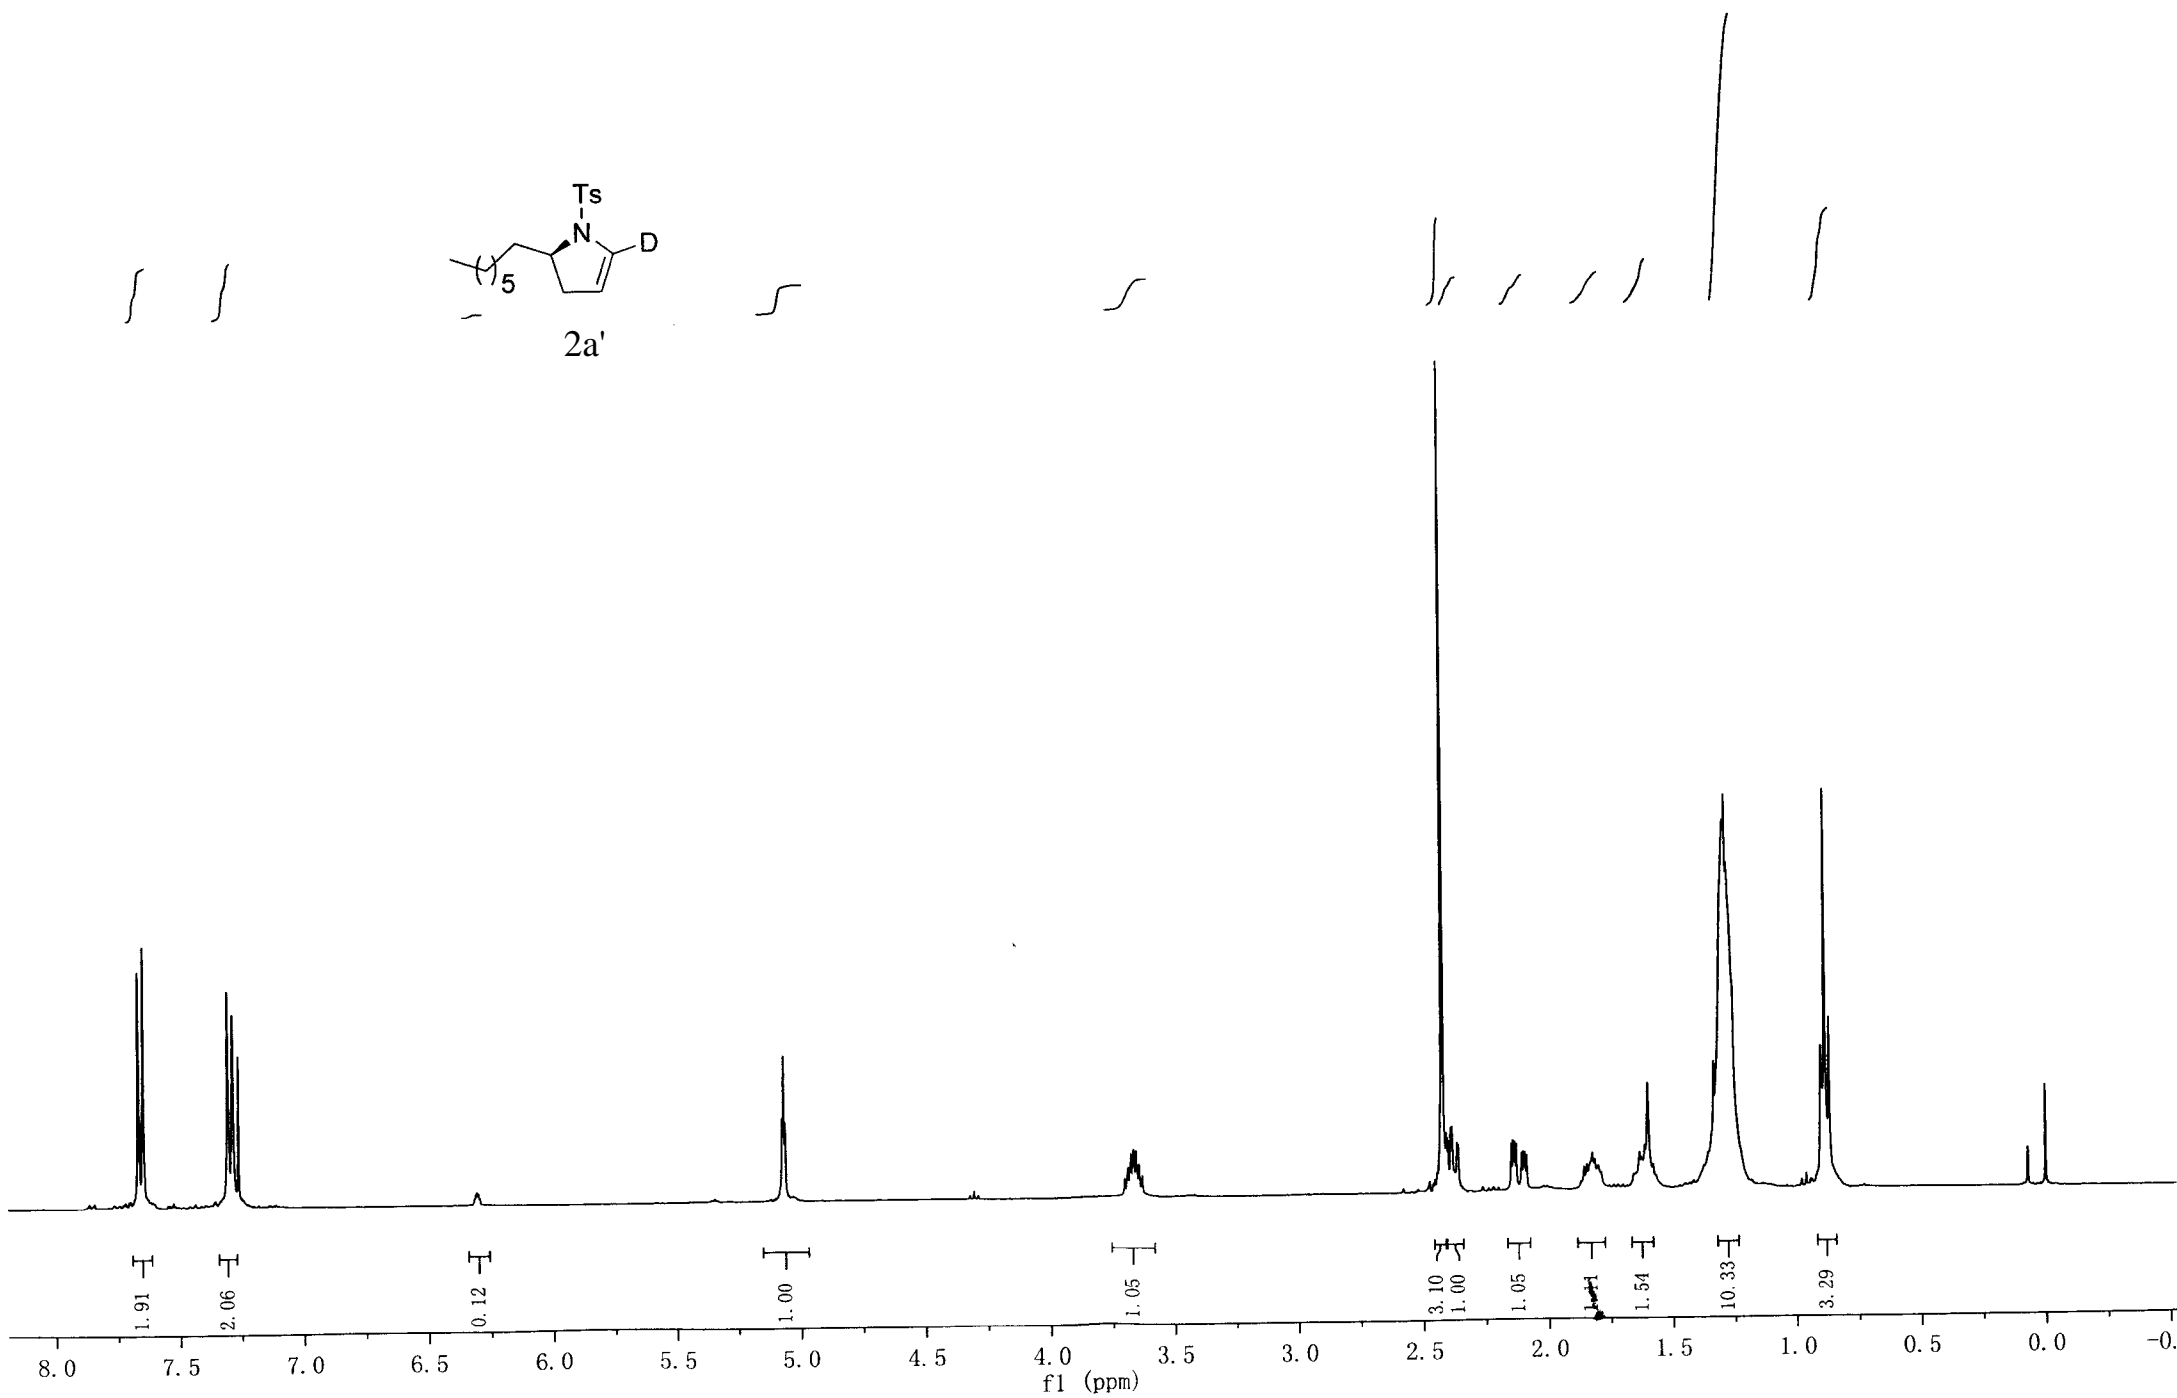



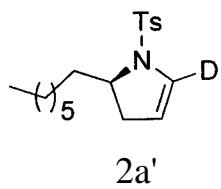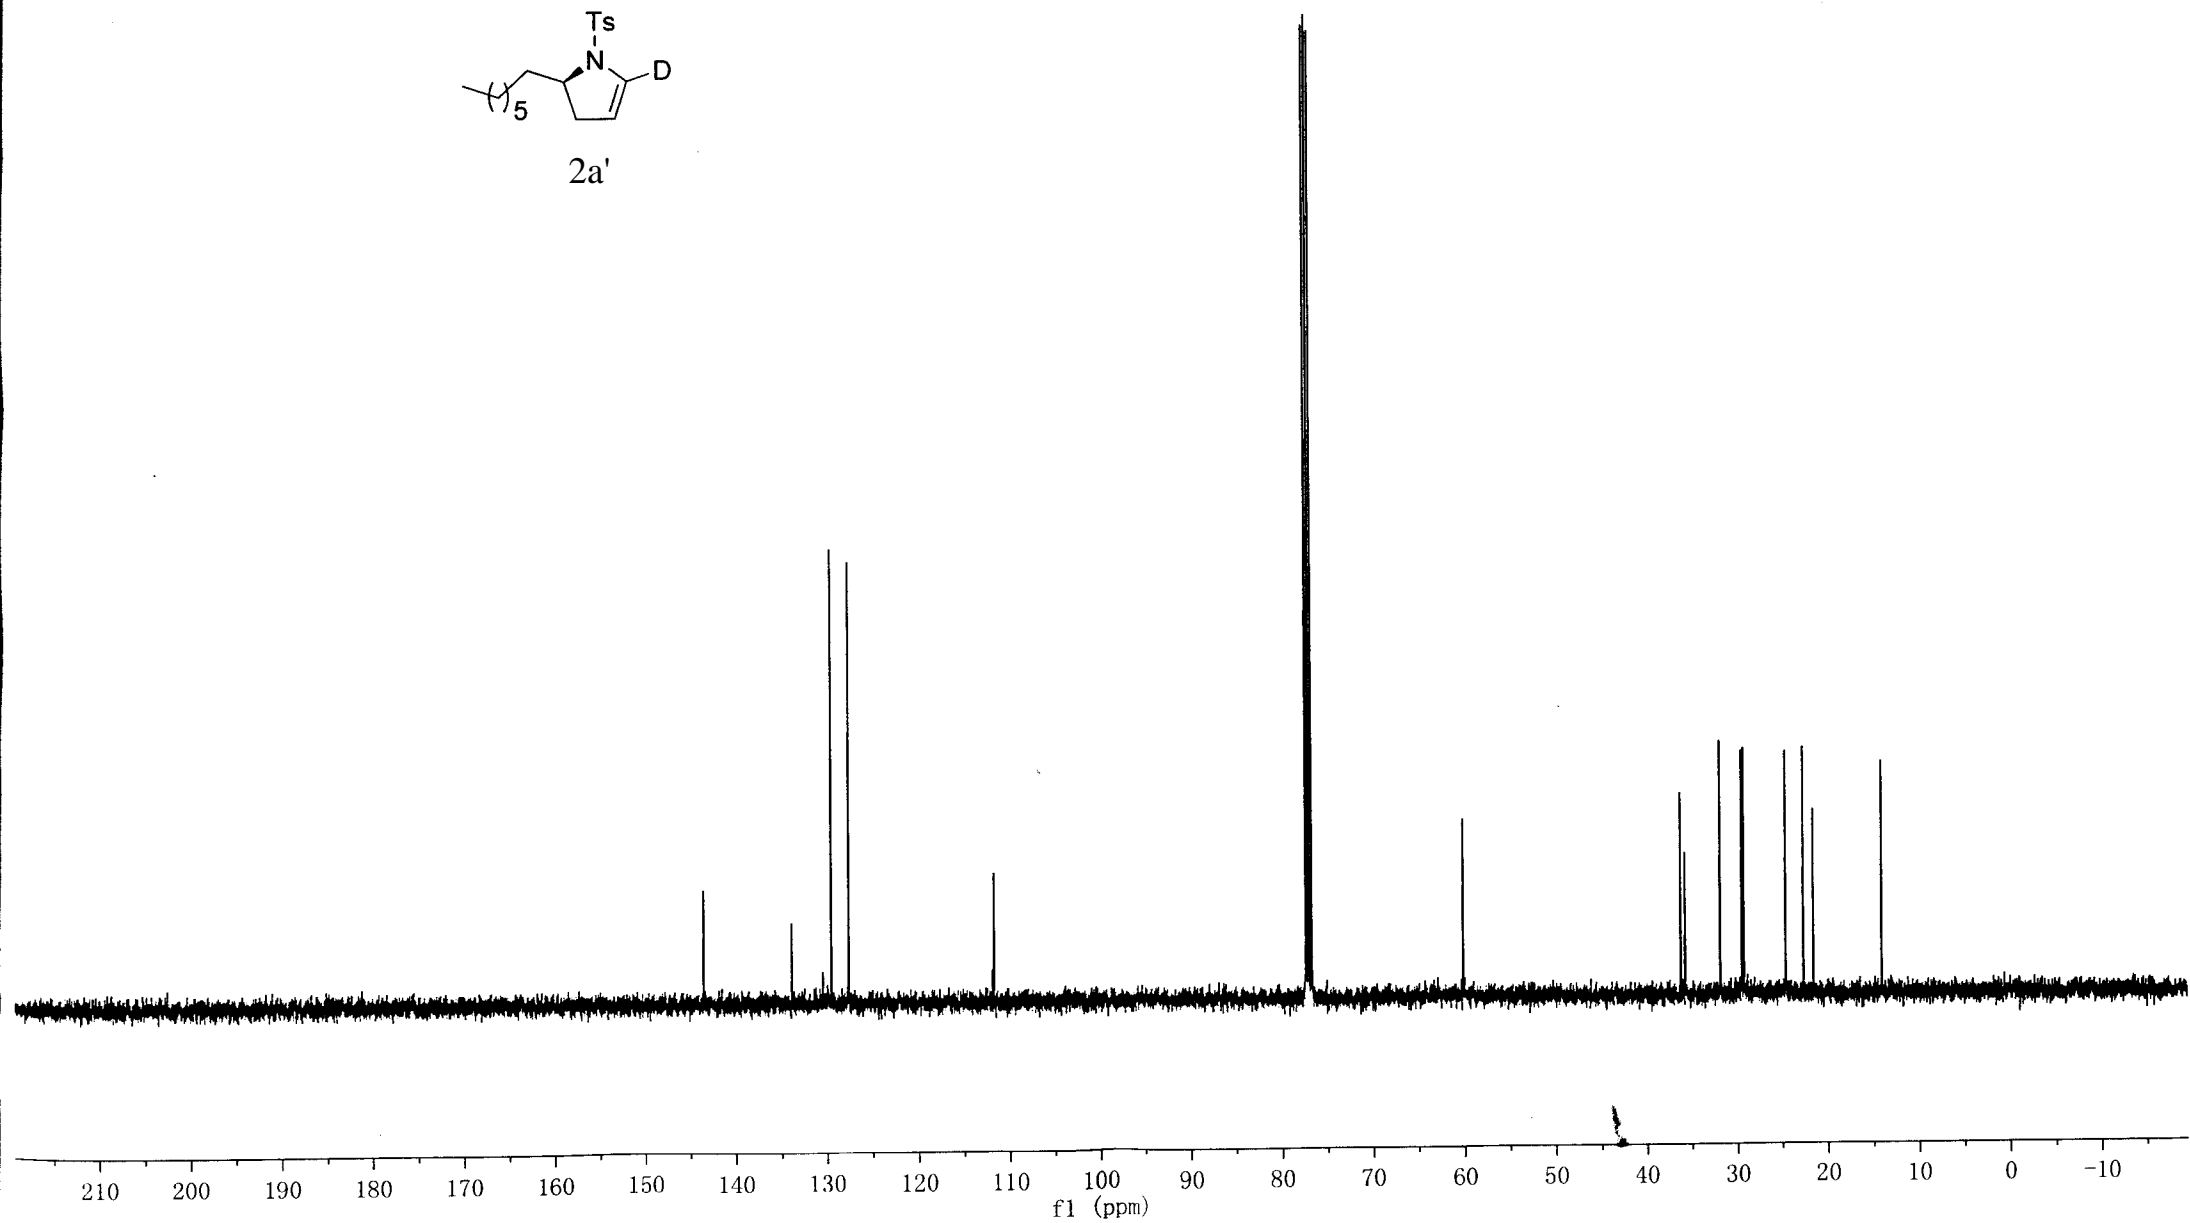

Supplement: c4cc09245g1.pdf [file c4cc09245g1.pdf]
